# Supplementary material
Source: Copernicus journal article supplement (doi:10.5194/egusphere-2026-1986)
Supplement: Supplementary file 1 [file egusphere-2026-1986-supplement.pdf]

## Supporting Information

# Perchloric acid (HClO<sub>4</sub>) Drives Atmospheric New Particle Formation Enhanced by Dimethylamine, ammonia and Sulfuric Acid: Mechanisms and Implications

Shengming Wang<sup>2,3</sup>, Xiangli Shi<sup>1,\*</sup>, Qingzhu Zhang<sup>2</sup>, Wenxing Wang<sup>2</sup>,

<sup>1</sup>College of Geography and Environment, Shandong Normal University, Jinan 250014, P. R. China

<sup>2</sup>Environment Research Institute, Shandong University, Qingdao 266237, P. R. China

<sup>3</sup>Laboratory of Atmospheric Environment and Pollution Control, Research Center for Eco-Environmental Sciences, Chinese Academy of Sciences, Beijing 100085, China

**Keywords:** New particle formation, Perchloric acid, Marine aerosol, Particle formation rate, Cluster concentration, Atmospheric nucleation precursor

---

\*Corresponding authors. E-mail: shixl@sdu.edu.cn

**Section S1. The multi-step searching method to systematically screen the most stable structures of clusters.**

**Section S2. Atmospheric clusters dynamic simulations**

**Section S3. The boundary clusters in the simulated system.**

**Section S4. Figures and Tables**

**Figure S1.** The most stable configurations of  $(\text{PA})_m(\text{NH}_3)_n$  ( $m = 0-4$  and  $n = 0-4$ ) clusters calculated at the DLPNO-CCSD(T)/aug-cc-pVTZ// $\omega$ B97X-D/6-31++G(d,p) level of theory. The dashed white lines indicate hydrogen bonds. The white, red, gray, blue and green spheres denote the H, O, C, N and Cl atoms, respectively.

**Figure S2.** The formation free energy ( $\Delta G$ ) (in kcal mol<sup>-1</sup>) of  $(\text{PA})_m(\text{NH}_3)_n$  clusters ( $m = 0-4$  and  $n = 0-4$ ) calculated at the DLPNO-CCSD(T)/aug-cc-pVTZ// $\omega$  B97X-D/6-31++G(d,p) level of theory. The calculations are performed at 278 K and 1 atm.

**Figure S3.** Evaporation rates for  $(\text{PA})_m(\text{NH}_3)_n$  clusters ( $m = 0-4$  and  $n = 0-4$ ), at 278 K and 1 atm.

**Figure S4.** The simulated cluster formation rate  $J$  (cm<sup>-3</sup> s<sup>-1</sup>) of PA–NH<sub>3</sub> system at 278 K with different [DMA] (1 –100 ppt), and  $\text{CS} = 2 \times 10^{-3}$  s<sup>-1</sup>.

**Figure S5.** The simulated steady-state PA dimer concentration of PA–NH<sub>3</sub> cluster system at 278 K with different [NH<sub>3</sub>] (1 –100 ppt), and  $\text{CS} = 2 \times 10^{-3}$  s<sup>-1</sup>.

**Figure S6.** Ratios of collision frequencies with (A) DMA monomer or (B) PA monomer versus total evaporation rate coefficients ( $\beta_{\text{DMA}}C_{\text{DMA}}/\Sigma\gamma$  or  $\beta_{\text{PA}}C_{\text{PA}}/\Sigma\gamma$ ) of the

corresponding clusters.

**Figure S7.** (A) Gibbs formation free energies ( $\Delta G$ ) of the  $(PA)_{1-4}(DMA)_{1-4}$  clusters identified at the DLPNO-CCSD(T)/aug-cc-pVTZ// $\omega$ B97X-D/6-31++G(d,p) level of theory,  $T = 238$  K,  $p = 1$  atm. (B) Total evaporation rate coefficients ( $\Sigma\gamma$  in  $s^{-1}$ ) and the ratios of collision frequencies with (C) DMA monomer or (D) PA monomer versus total evaporation rate coefficients ( $\beta_{DMA}C_{DMA}/\Sigma\gamma$  or  $\beta_{PA}C_{PA}/\Sigma\gamma$ ) of the corresponding clusters.

**Figure S8.** (A) Gibbs formation free energies ( $\Delta G$ ) of the  $(PA)_{1-4}(DMA)_{1-4}$  clusters identified at the DLPNO-CCSD(T)/aug-cc-pVTZ// $\omega$ B97X-D/6-31++G(d,p) level of theory,  $T = 258$  K,  $p = 1$  atm. (B) Total evaporation rate coefficients ( $\Sigma\gamma$  in  $s^{-1}$ ) and the ratios of collision frequencies with (C) DMA monomer or (D) PA monomer versus total evaporation rate coefficients ( $\beta_{DMA}C_{DMA}/\Sigma\gamma$  or  $\beta_{PA}C_{PA}/\Sigma\gamma$ ) of the corresponding clusters.

**Figure S9.** (A) Gibbs formation free energies ( $\Delta G$ ) of the  $(PA)_{1-4}(DMA)_{1-4}$  clusters identified at the DLPNO-CCSD(T)/aug-cc-pVTZ// $\omega$ B97X-D/6-31++G(d,p) level of theory,  $T = 298$  K,  $p = 1$  atm. (B) Total evaporation rate coefficients ( $\Sigma\gamma$  in  $s^{-1}$ ) and the ratios of collision frequencies with (C) DMA monomer or (D) PA monomer versus total evaporation rate coefficients ( $\beta_{DMA}C_{DMA}/\Sigma\gamma$  or  $\beta_{PA}C_{PA}/\Sigma\gamma$ ) of the corresponding clusters.

**Figure S10.** The most stable configurations of  $(PA)_m(SA)_n$  ( $m = 0-4$  and  $n = 0-4$ ) clusters calculated at the DLPNO-CCSD(T)/aug-cc-pVTZ// $\omega$ B97X-D/6-31++G(d,p) level of theory. The dashed white lines indicate hydrogen bonds. The white, red, gray,

yellow and green spheres denote the H, O, S, N and Cl atoms, respectively.

**Figure S11.** The simulated cluster formation rate  $J$  ( $\text{cm}^{-3} \text{s}^{-1}$ ) of PA–SA system at 278 K with different [SA] ( $10^6$ – $10^8 \text{ cm}^{-3}$ ), and  $\text{CS} = 2 \times 10^{-3} \text{ s}^{-1}$ .

**Figure S12.** The simulated steady-state PA dimer concentration of PA–SA cluster system at 278 K with different [SA] ( $10^6$ – $10^8 \text{ cm}^{-3}$ ), and  $\text{CS} = 2 \times 10^{-3} \text{ s}^{-1}$ .

**Figure S13.** The most stable configurations of  $(\text{CA})_m(\text{PA})_n$  ( $m = 0$ – $3$  and  $n = 0$ – $3$ ) clusters calculated at the DLPNO-CCSD(T)/aug-cc-pVTZ// $\omega$ B97X-D/6-31++G(d,p) level of theory. The dashed white lines indicate hydrogen bonds. The white, red, gray, and green spheres denote the H, O, C, and Cl atoms, respectively.

**Figure S14.** The formation free energy ( $\Delta G$ ) (in  $\text{kcal mol}^{-1}$ ) of  $(\text{CA})_m(\text{PA})_n$  clusters ( $m = 0$ – $3$  and  $n = 0$ – $3$ ) calculated at the DLPNO-CCSD(T)/aug-cc-pVTZ// $\omega$  B97X-D/6-31++G(d,p) level of theory. The calculations are performed at 278 K and 1 atm.

**Figure S15.** Evaporation rates for  $(\text{CA})_m(\text{PA})_n$  clusters ( $m = 0$ – $3$  and  $n = 0$ – $3$ ), at 278 K and 1 atm.

**Figure S16.** The simulated cluster formation rate  $J$  ( $\text{cm}^{-3} \text{s}^{-1}$ ) of CA–PA system at 278 K with different [CA] ( $10^6$ – $10^8 \text{ cm}^{-3}$ ), and  $\text{CS} = 2 \times 10^{-3} \text{ s}^{-1}$ .

**Figure S17.** The simulated steady-state CA dimer concentration of CA–PA cluster system at 278 K with different [PA] ( $10^6$ – $10^8 \text{ cm}^{-3}$ ), and  $\text{CS} = 2 \times 10^{-3} \text{ s}^{-1}$ .

**Figure S18.** Main clustering pathways of  $(\text{CA})_m(\text{PA})_n$  ( $m = 0$ – $3$  and  $n = 0$ – $3$ ) clusters at 278 K,  $[\text{CA}] = 10^7 \text{ cm}^{-3}$ , and  $[\text{PA}] = 10^7 \text{ cm}^{-3}$ .

**Table S1.** Coordinates of all optimized clusters

**Section S1. The multi-step searching method to systematically screen the most stable structures of clusters.**

In order to locate the conformer of the chlorine oxoacids clusters with lowest energy, a systematic multi-step sampling scheme was employed here. First, the artificial bee colony algorithm was adopted to yield about 1000-10000 initial structures for each studied cluster by ABCcluster software<sup>[1]</sup>. The universal force field (UFF)<sup>[2]</sup> was used to obtain the energies of all the above structures. And then up to 1000 low-energy conformers were selected for pre-optimization by the PM7 semiempirical method<sup>[3]</sup> in MOPAC 2016<sup>[4]</sup>. Next, geometry optimization and

frequency calculations were carried out using the Gaussian 16 package and the employed integration grid is FineGrid<sup>[5]</sup>. Subsequently, single-point  $\omega$ B97X-D/6-31++G(d,p) energies were calculated, using Gaussian16, for the clusters, and only the 100 energetically lowest structures were saved for further optimization. About 100 structures with lower energies were selected to perform optimization at the  $\omega$ B97X-D/6-31+G(d,p) level of theory<sup>[6, 7]</sup>. 10 structures with lowest energies were further optimized at the  $\omega$ B97X-D/6-31++G(d,p) level of theory to obtain the global minimum one with no imaginary frequency<sup>[6, 7]</sup>. Finally, for 10 global energy minimum structures of the molecular cluster, the single-point correction was carried out at the DLPNO-CCSD(T)/aug-cc-pVTZ-PP level. The DLPNO-CCSD(T) calculations were performed using the ORCA 4.0.0 program<sup>[8]</sup>.

## Section S2. Atmospheric clusters dynamic simulations

Atmospheric Cluster Dynamics Code (ACDC)<sup>[9]</sup> was used to study the cluster kinetic process by explicit solution of the birth–death equations, which can be written as follows:

$$\frac{dC_i}{dt} = \frac{1}{2} \sum_{j < i} \beta_{j,(i-j)} C_j C_{i-j} + \sum_j \gamma_{j,(i+j) \rightarrow i} C_{i+j} - \sum_j \beta_{i,j} C_i C_j - \frac{1}{2} \sum_{j < i} \gamma_{i \rightarrow j} C_i + Q_i - S_i$$

where  $C_i$  is the concentration of cluster  $i$ ,  $\beta_{i,j}$  is the rate coefficient of collision between clusters  $i$  and  $j$ ,  $\gamma_{(i+j) \rightarrow i}$  is the evaporating rate coefficient of cluster  $(i + j)$  into clusters  $i$  and  $j$ ,  $Q_i$  and  $S_i$  are the external source term and possible loss term of cluster  $i$ , respectively. The condensation sink (CS) coefficient is set to be a typical value ( $2 \times 10^{-3} \text{ s}^{-1}$ ) in coastal regions<sup>[10]</sup>.

The kinetic gas theory was taken to calculate the collision rate coefficient between two clusters.  $\beta_{i,j}$  is calculated as follows:

$$\beta_{i,j} = \left(\frac{3}{4\pi}\right)^{1/6} \left(\frac{6k_B T}{m_i} + \frac{6k_B T}{m_j}\right)^{1/2} \left(V_i^{1/3} + V_j^{1/3}\right)^2$$

where  $m_i$  is the mass of cluster  $i$ ,  $T$  is the temperature and  $k_B$  is the Boltzmann constant.  $V_i$  is the van der Waals (vdW) volume of cluster  $i$ , calculated based on the Marching Tetrahedra (MT) approach<sup>[11]</sup> using Multiwfn. And  $g_{(i+j) \rightarrow i}$  is given as follows:

$$g_{(i+j) \rightarrow i} = \beta_{i,j} \frac{P_{ref}}{k_B T} \exp\left(\frac{\Delta G_{i+j} - \Delta G_i - \Delta G_j}{k_B T}\right)$$

where  $P_{ref}$  is the reference pressure (1 atm) and  $\Delta G_i$  is the Gibbs free energy of the formation of cluster  $i$ .

### **Section S3. The boundary clusters in the simulated system.**

In ACDC simulation, the boundary clusters are ones allowed to flux out the simulation box for further growth, therefore, these clusters are required to have favorable compositions for high stability (low evaporation rate). The boundary clusters are the smallest clusters outside the simulated system. Once the boundary clusters are formed, they tend to keep growing rather than evaporate into smaller

clusters<sup>[9]</sup>. Boundary conditions require that the growing clusters could be sufficiently stable and the clusters should be more likely to grow than evaporate. For  $(\text{PA})_m(\text{DMA})_n$  ( $m = 0-4$ ,  $n = 0-4$ ) clusters, clusters with roughly equal numbers of PA and DMA molecules have lower evaporation rates and higher concentrations in the simulations. This allows us to select  $(\text{PA})_5(\text{DMA})_4$  and  $(\text{PA})_4(\text{DMA})_5$  as the boundary clusters for chlorine oxoacid system in the  $4 \times 4$  box simulation.

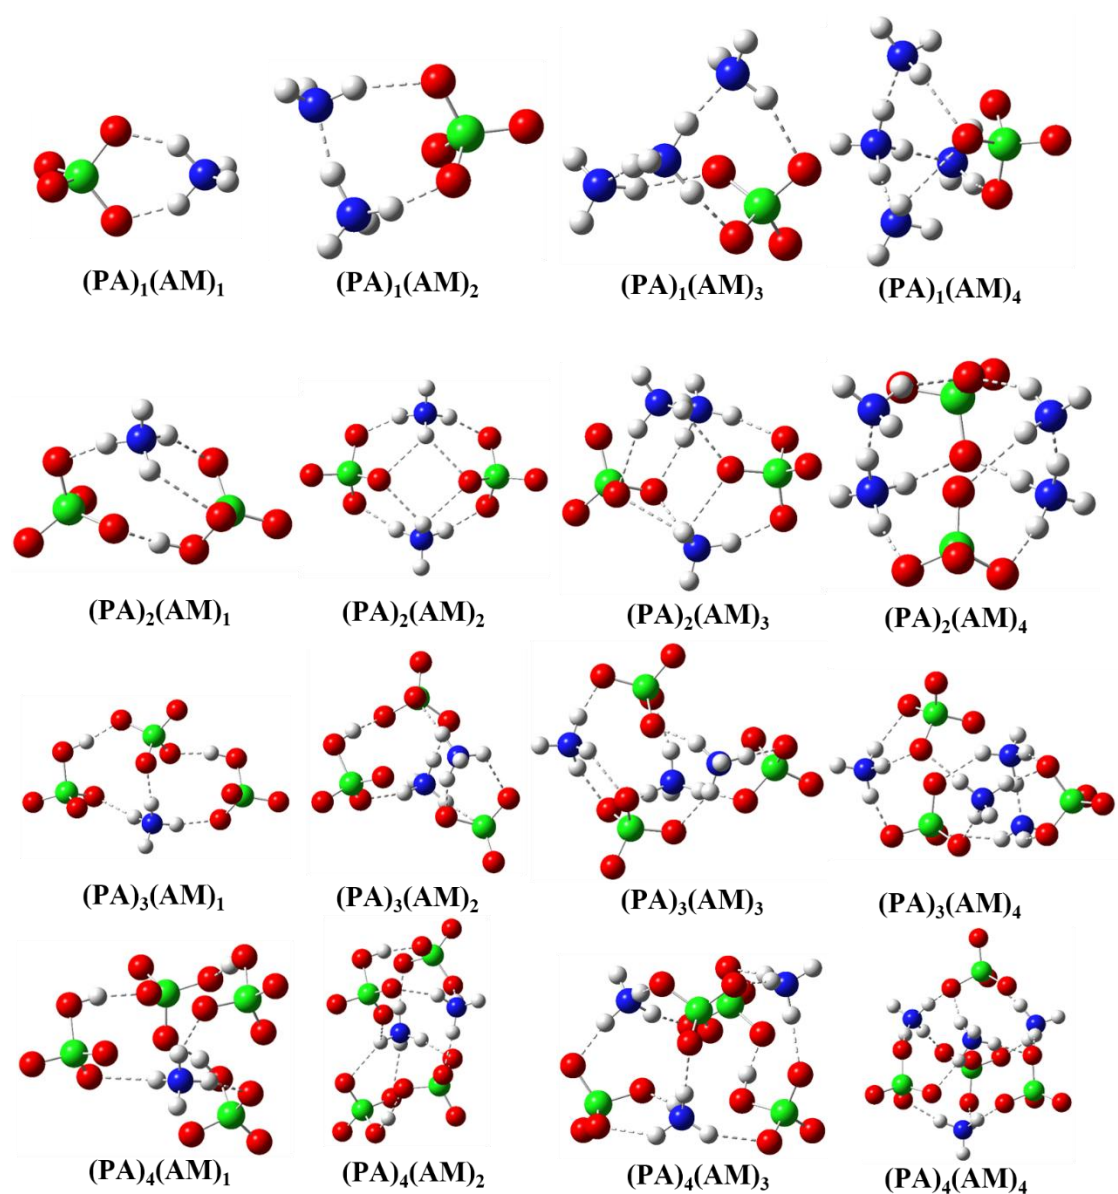

**Figure S1.** The most stable configurations of  $(PA)_m(AM)_n$  ( $m = 0-4$  and  $n = 0-4$ ) clusters calculated at the DLPNO-CCSD(T)/aug-cc-pVTZ// $\omega$ B97X-D/6-31++G(d,p) level of theory. The dashed white lines indicate hydrogen bonds. The white, red, gray, blue and green spheres denote the H, O, C, N and Cl atoms, respectively.

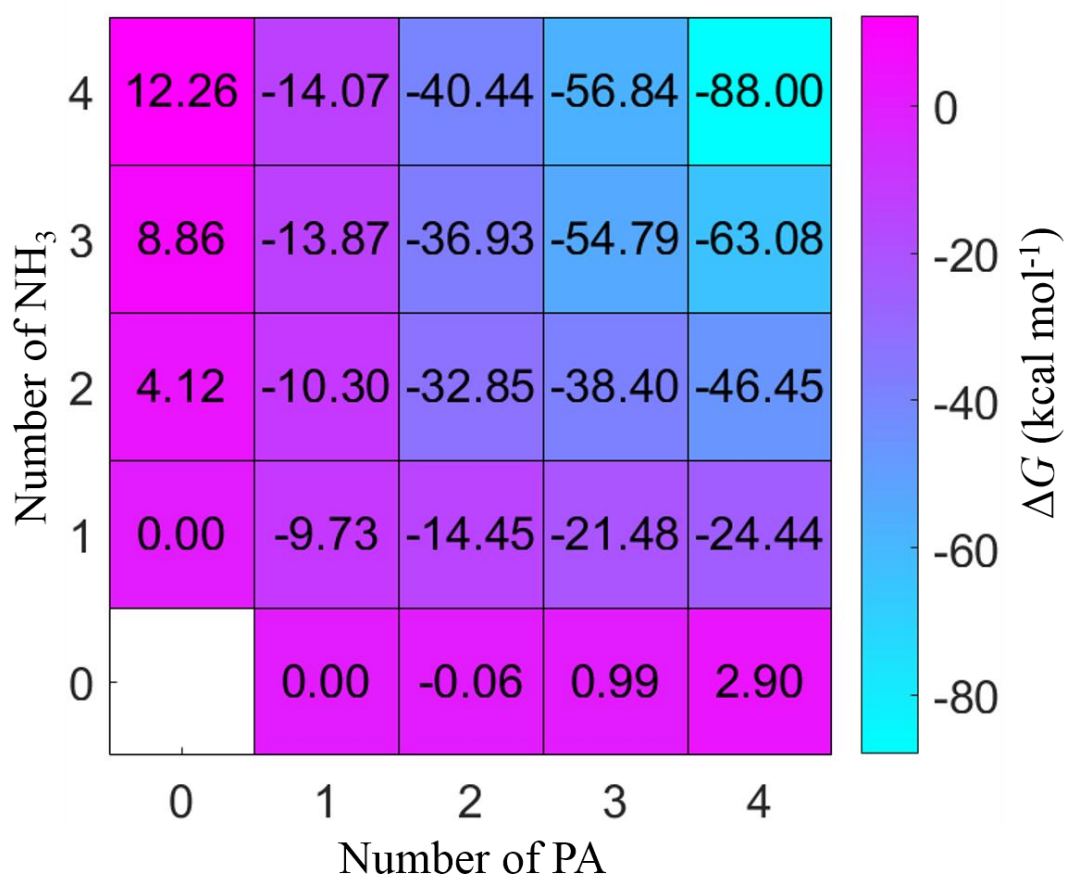

**Figure S2.** The formation free energy ( $\Delta G$ ) (in kcal mol<sup>-1</sup>) of (PA)<sub>m</sub>(NH<sub>3</sub>)<sub>n</sub> clusters (m = 0–4 and n = 0–4) calculated at the DLPNO-CCSD(T)/aug-cc-pVTZ//  $\omega$  B97X-D/6-31++G(d,p) level of theory. The calculations are performed at 278 K and 1 atm.

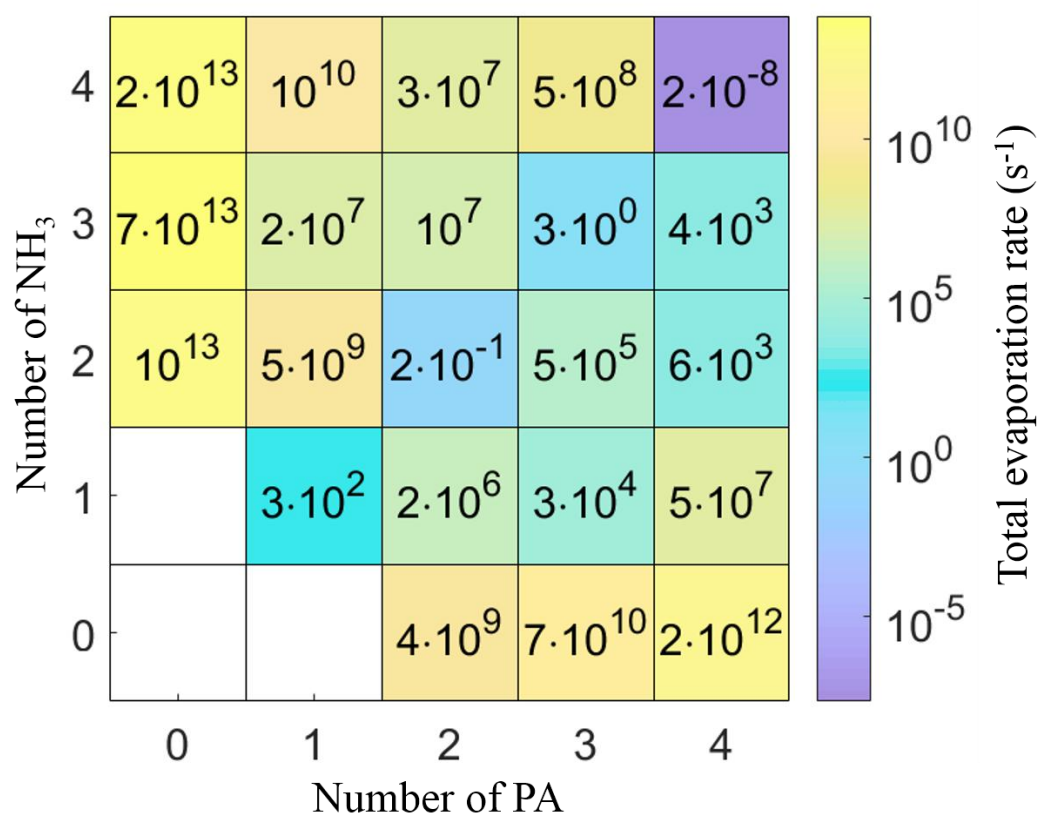

**Figure S3.** Evaporation rates for  $(\text{PA})_m(\text{NH}_3)_n$  clusters ( $m = 0-4$  and  $n = 0-4$ ), at 278 K and 1 atm.

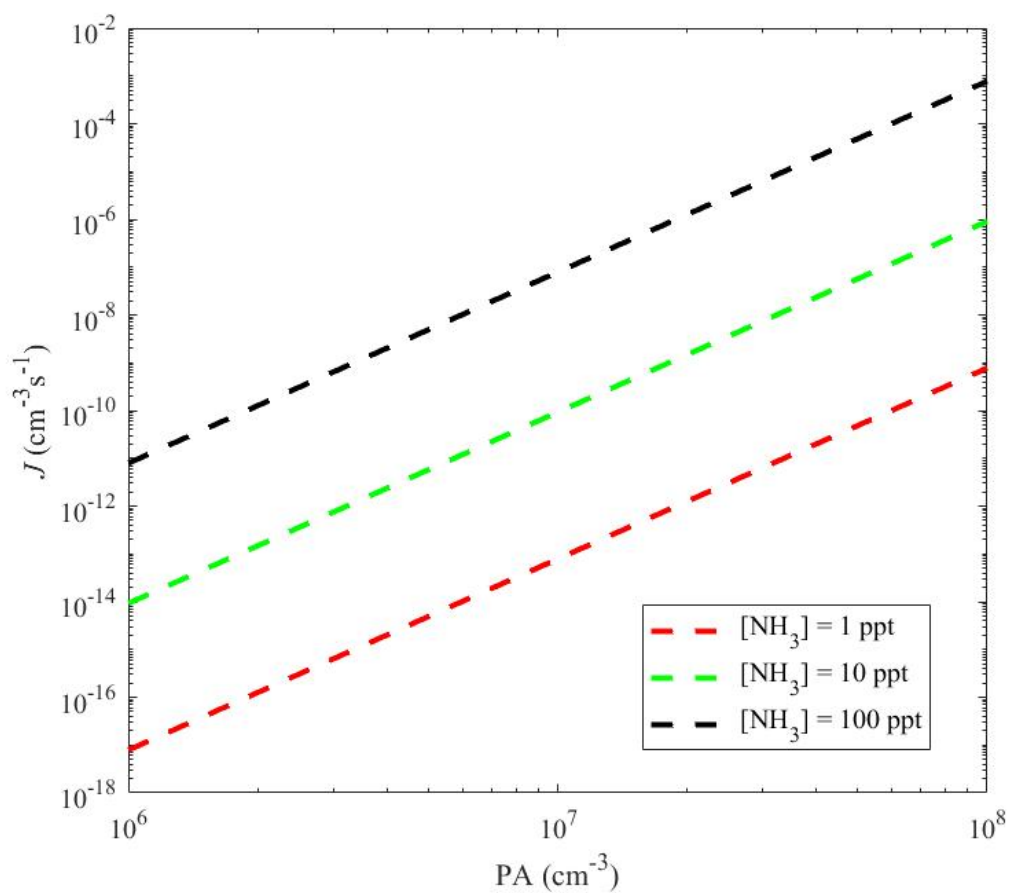

**Figure S4.** The simulated cluster formation rate  $J$  ( $\text{cm}^{-3} \text{s}^{-1}$ ) of PA–NH<sub>3</sub> system at 278 K with different [DMA] (0.1–10 ppt), and  $\text{CS} = 2 \times 10^{-3} \text{s}^{-1}$ .

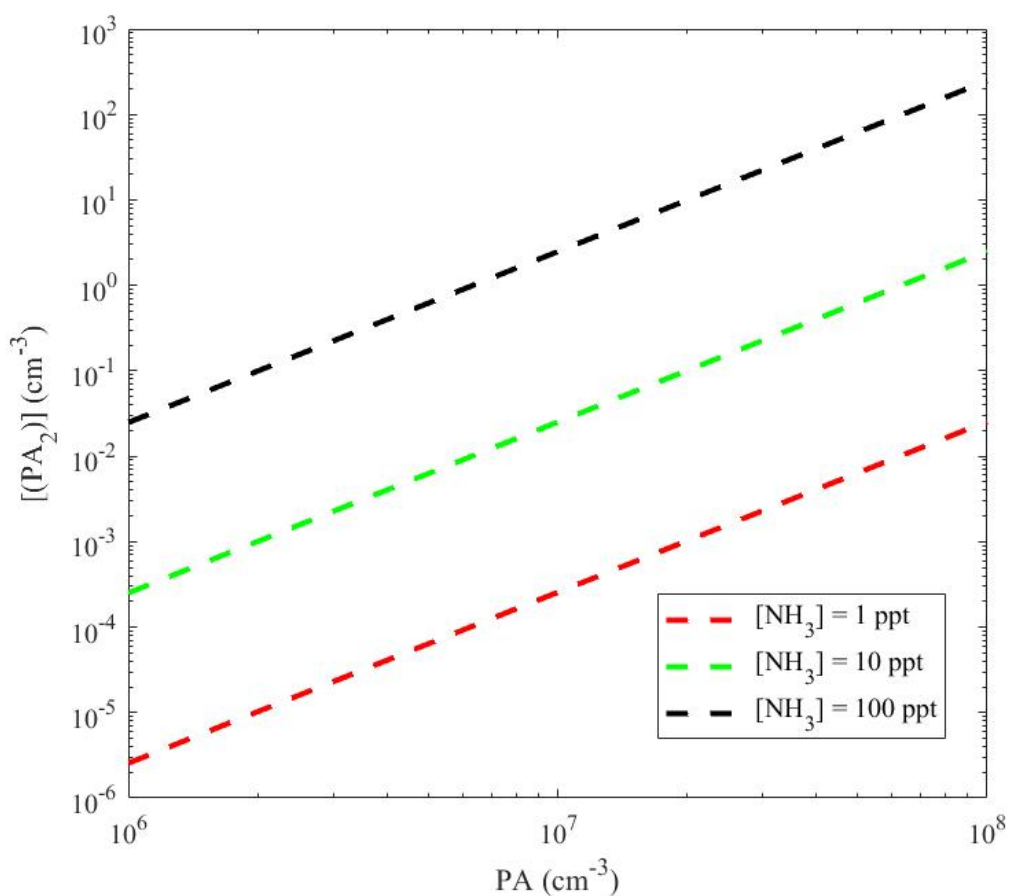

**Figure S5.** The simulated steady-state PA dimer concentration of PA–NH<sub>3</sub> cluster system at 278 K with different [NH<sub>3</sub>] (0.1 –10 ppt), and CS = 2 × 10<sup>-3</sup> s<sup>-1</sup>.

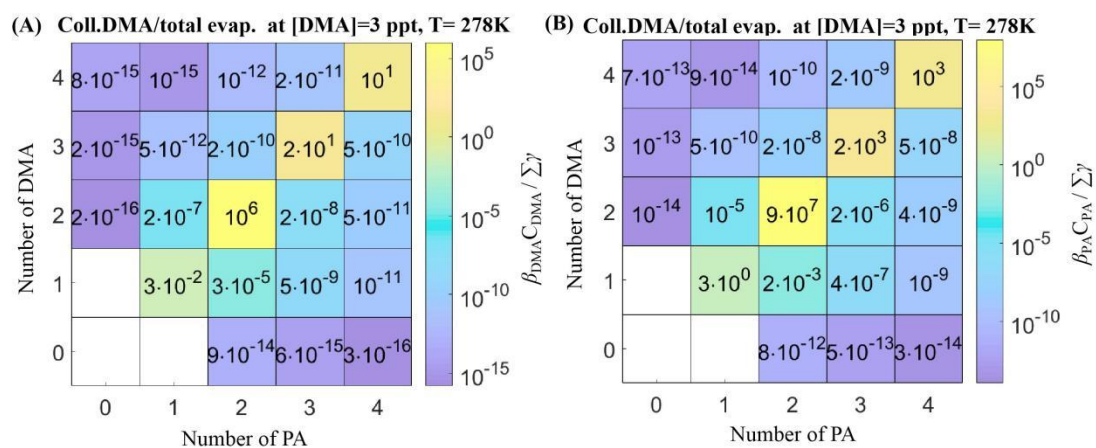

**Figure S6.** Ratios of collision frequencies with (A) DMA monomer or (B) PA

monomer versus total evaporation rate coefficients ( $\beta_{\text{DMA}}C_{\text{DMA}}/\Sigma\gamma$  or  $\beta_{\text{PA}}C_{\text{PA}}/\Sigma\gamma$ ) of the corresponding clusters.

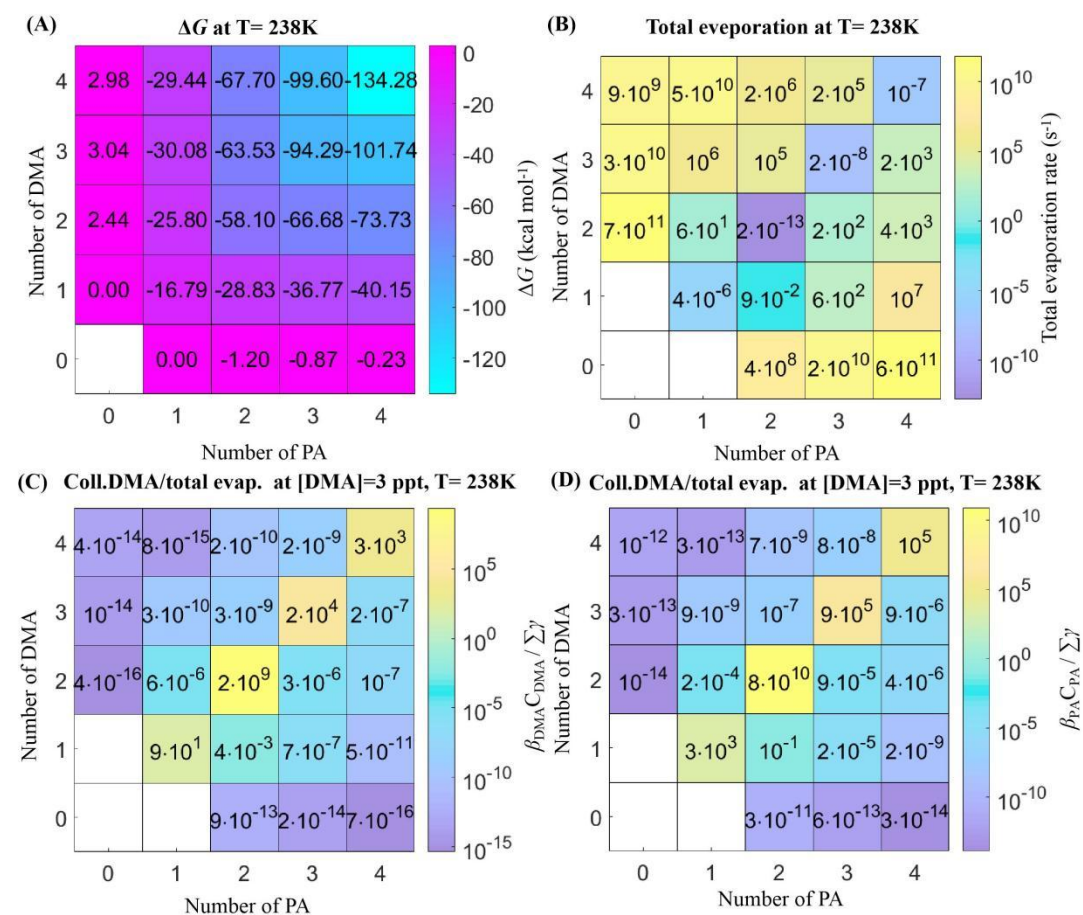

**Figure S7.** (A) Gibbs formation free energies ( $\Delta G$ ) of the  $(\text{PA})_{1-4}(\text{DMA})_{1-4}$  clusters identified at the DLPNO-CCSD(T)/aug-cc-pVTZ// $\omega$ B97X-D/6-31++G(d,p) level of theory, T = 238 K, p = 1 atm. (B) Total evaporation rate coefficients ( $\Sigma\gamma$  in  $\text{s}^{-1}$ ) and the ratios of collision frequencies with (C) DMA monomer or (D) PA monomer versus total evaporation rate coefficients ( $\beta_{\text{DMA}}C_{\text{DMA}}/\Sigma\gamma$  or  $\beta_{\text{PA}}C_{\text{PA}}/\Sigma\gamma$ ) of the corresponding clusters.

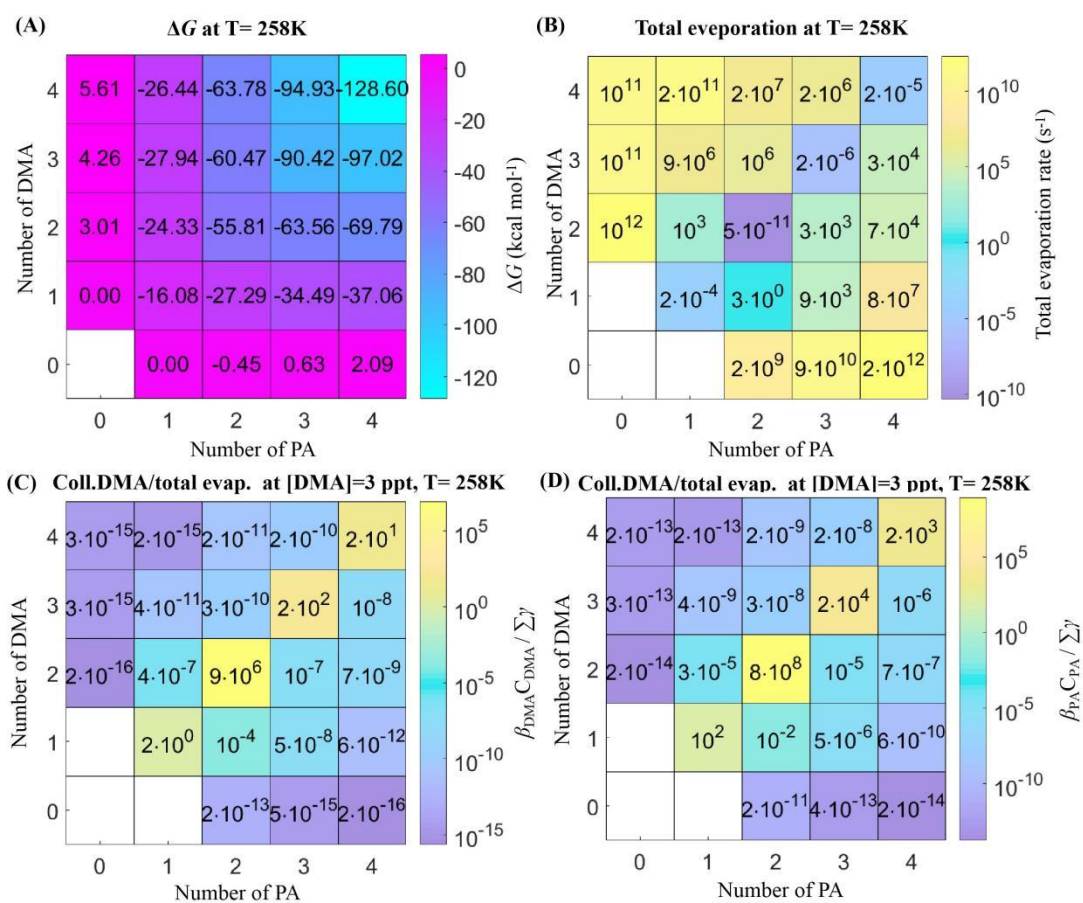

**Figure S8.** (A) Gibbs formation free energies ( $\Delta G$ ) of the  $(\text{PA})_{1-4}(\text{DMA})_{1-4}$  clusters identified at the DLPNO-CCSD(T)/aug-cc-pVTZ// $\omega$ B97X-D/6-31++G(d,p) level of theory,  $T = 258 \text{ K}$ ,  $p = 1 \text{ atm}$ . (B) Total evaporation rate coefficients ( $\Sigma\gamma$  in  $\text{s}^{-1}$ ) and the ratios of collision frequencies with (C) DMA monomer or (D) PA monomer versus total evaporation rate coefficients ( $\beta_{\text{DMA}}C_{\text{DMA}}/\Sigma\gamma$  or  $\beta_{\text{PA}}C_{\text{PA}}/\Sigma\gamma$ ) of the corresponding clusters.

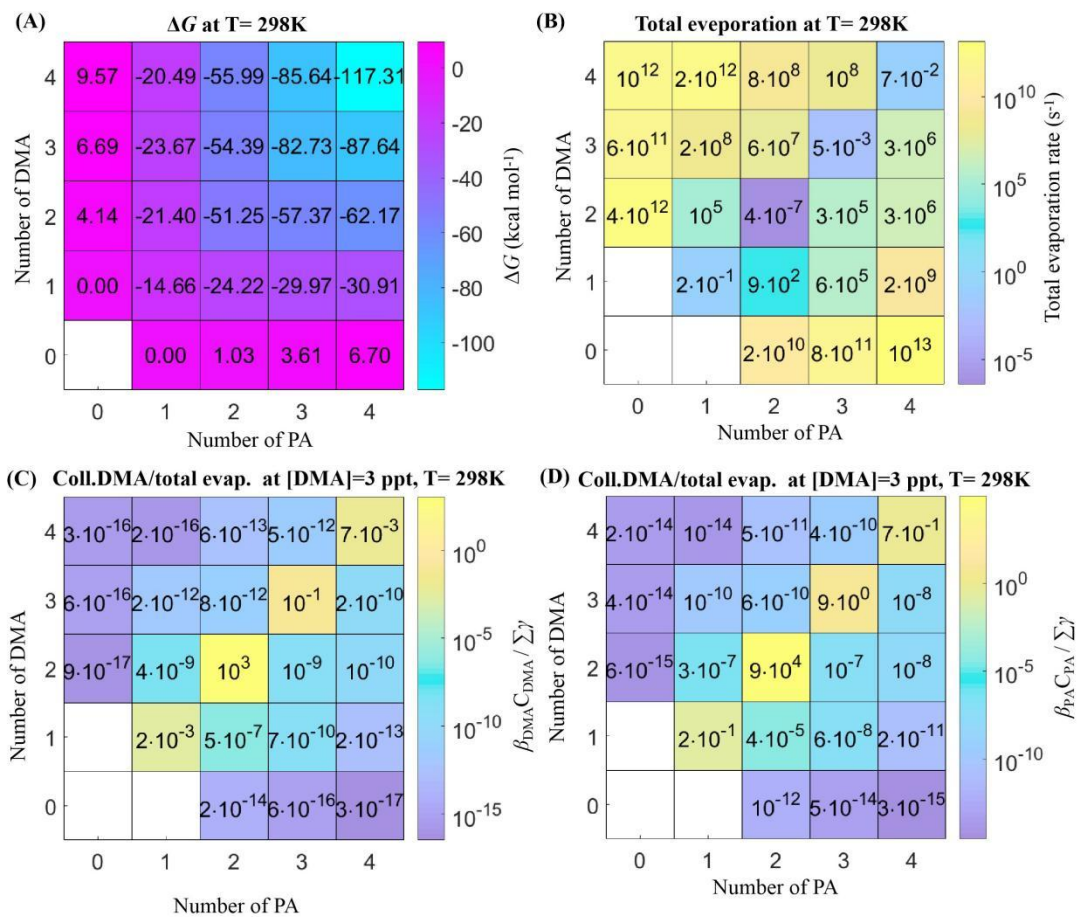

**Figure S9.** (A) Gibbs formation free energies ( $\Delta G$ ) of the  $(\text{PA})_{1-4}(\text{DMA})_{1-4}$  clusters identified at the DLPNO-CCSD(T)/aug-cc-pVTZ// $\omega$ B97X-D/6-31++G(d,p) level of theory,  $T = 298 \text{ K}$ ,  $p = 1 \text{ atm}$ . (B) Total evaporation rate coefficients ( $\Sigma\gamma$  in  $\text{s}^{-1}$ ) and the ratios of collision frequencies with (C) DMA monomer or (D) PA monomer versus total evaporation rate coefficients ( $\beta_{\text{DMA}}C_{\text{DMA}}/\Sigma\gamma$  or  $\beta_{\text{PA}}C_{\text{PA}}/\Sigma\gamma$ ) of the corresponding clusters.

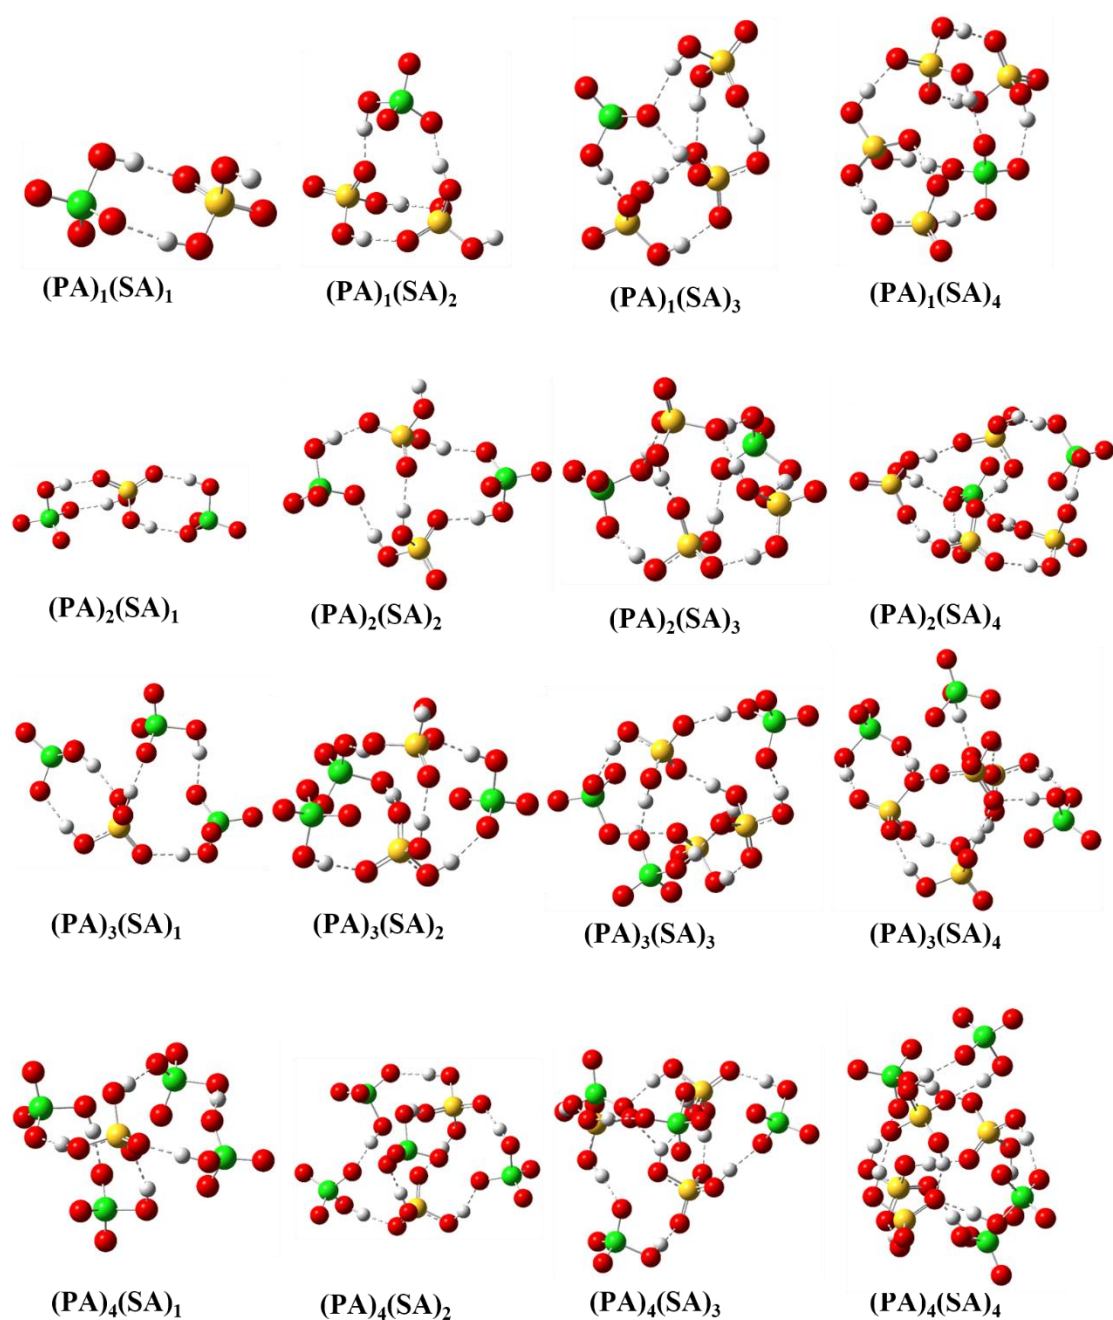

**Figure S10.** The most stable configurations of  $(PA)_m(SA)_n$  ( $m = 0-4$  and  $n = 0-4$ ) clusters calculated at the DLPNO-CCSD(T)/aug-cc-pVTZ// $\omega$ B97X-D/6-31++G(d,p) level of theory. The dashed white lines indicate hydrogen bonds. The white, red, gray, yellow and green spheres denote the H, O, S, N and Cl atoms, respectively.

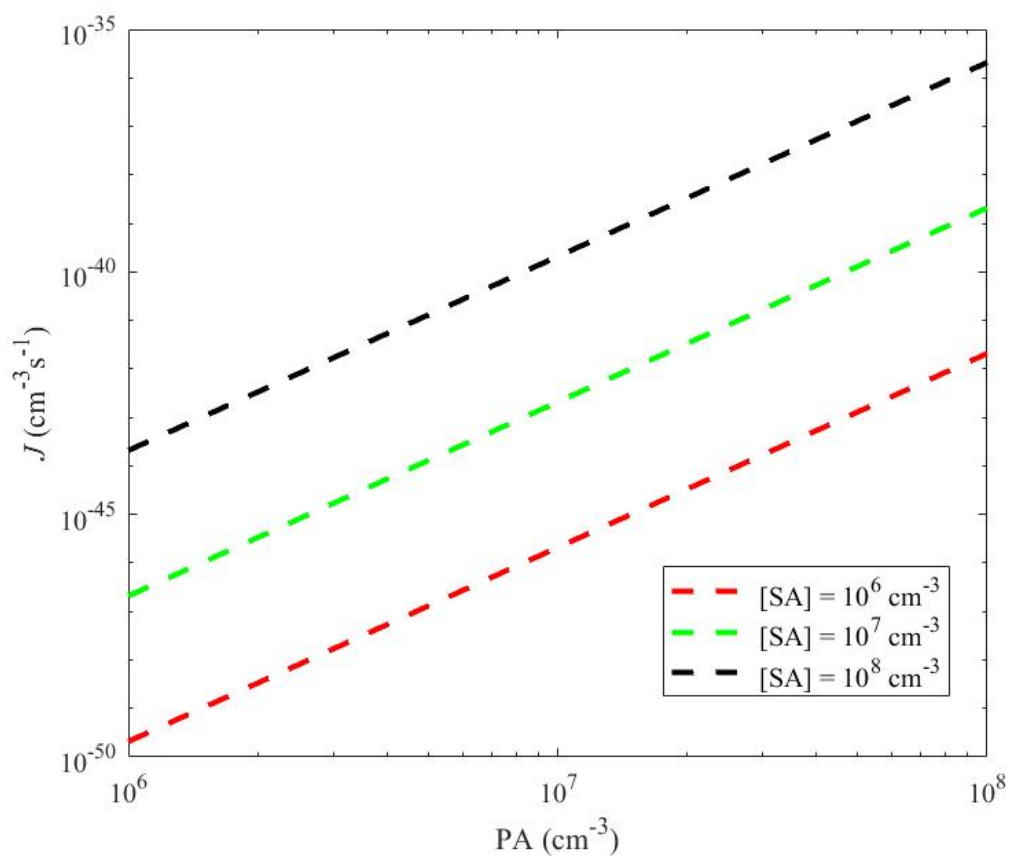

**Figure S11.** The simulated cluster formation rate  $J$  ( $\text{cm}^{-3} \text{s}^{-1}$ ) of PA–SA system at 278 K with different [SA] ( $10^6$ – $10^8 \text{ cm}^{-3}$ ), and  $\text{CS} = 2 \times 10^{-3} \text{ s}^{-1}$ .

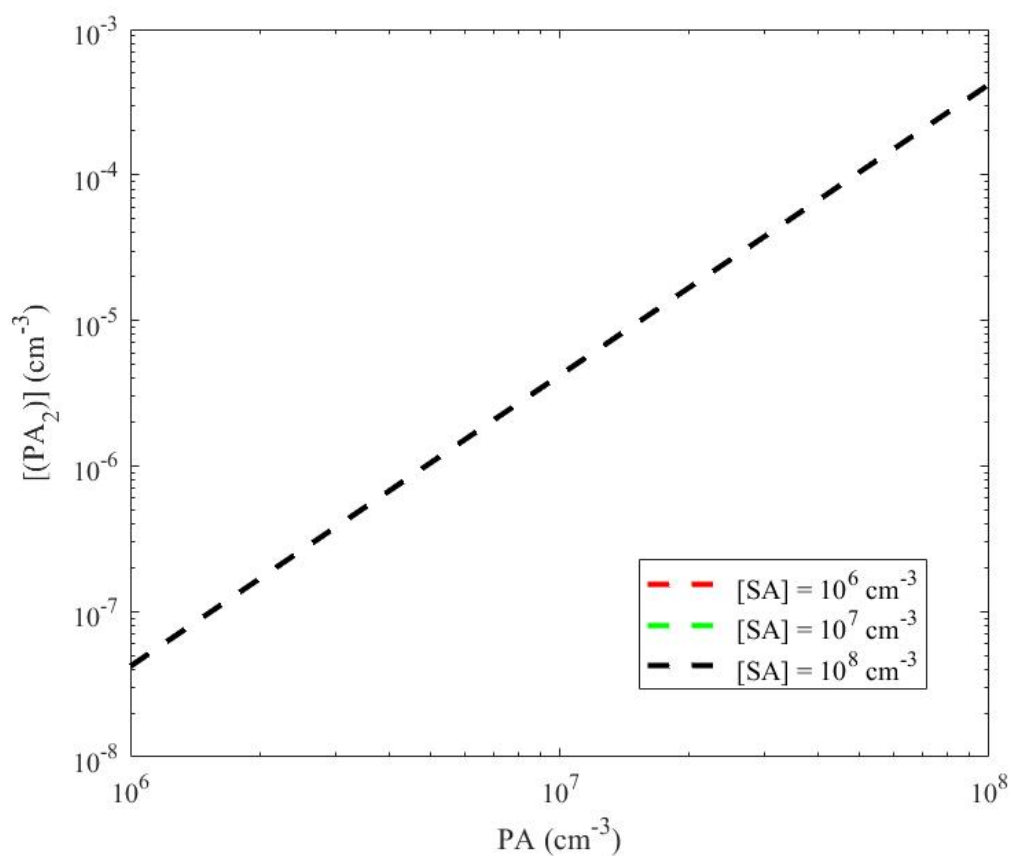

**Figure S12.** The simulated steady-state PA dimer concentration of PA–SA cluster system at 278 K with different  $[SA]$  ( $10^6$ – $10^8 cm^{-3}$ ), and  $CS = 2 \times 10^{-3} s^{-1}$ .

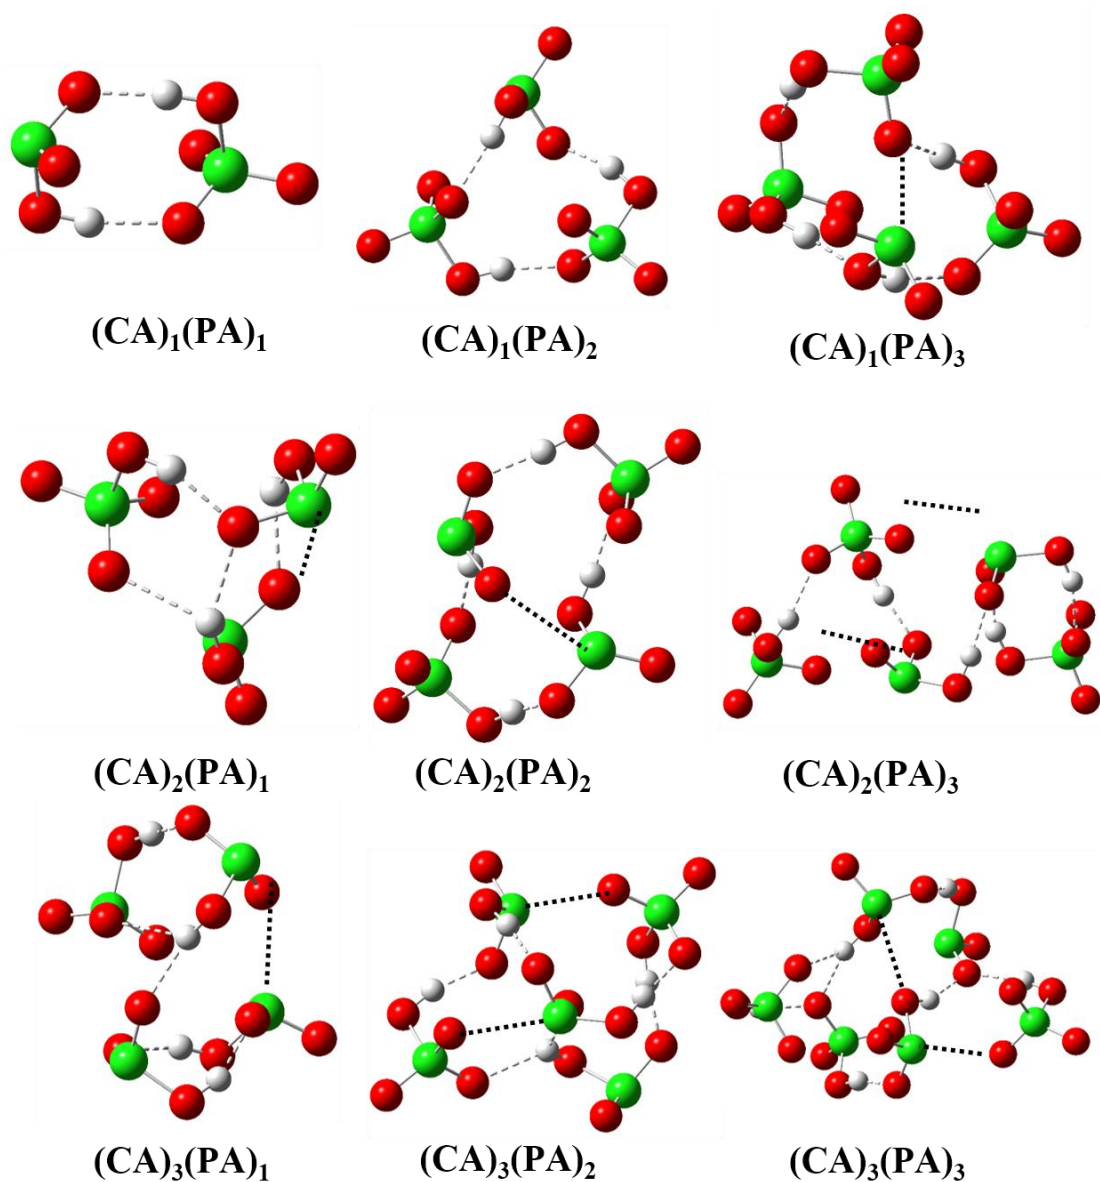

**Figure S13.** The most stable configurations of  $(\text{CA})_m(\text{PA})_n$  ( $m = 0-3$  and  $n = 0-3$ ) clusters calculated at the DLPNO-CCSD(T)/aug-cc-pVTZ// $\omega$ B97X-D/6-31++G(d,p) level of theory. The dashed white lines indicate hydrogen bonds. The white, red, gray, and green spheres denote the H, O, C, and Cl atoms, respectively.

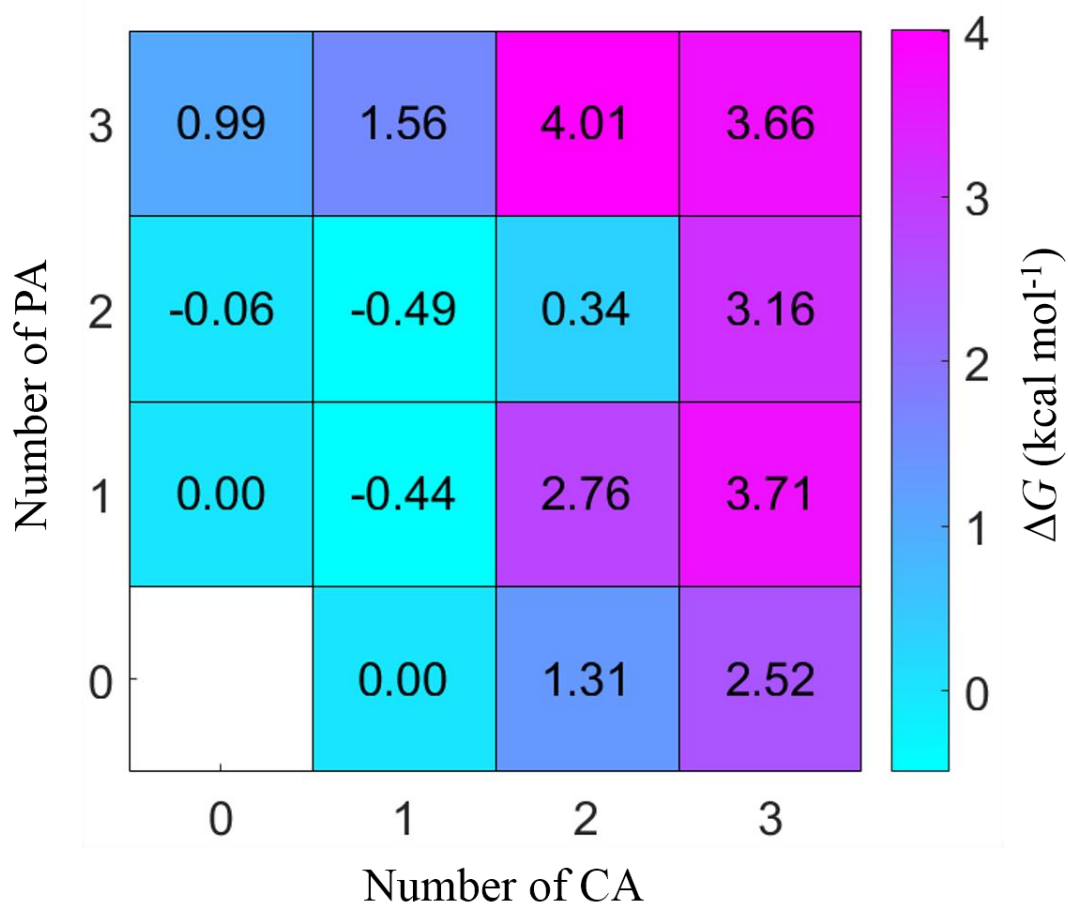

**Figure S14.** The formation free energy ( $\Delta G$ ) (in kcal mol<sup>-1</sup>) of (CA)<sub>m</sub>(PA)<sub>n</sub> clusters (m = 0–3 and n = 0–3) calculated at the DLPNO-CCSD(T)/aug-cc-pVTZ//  $\omega$  B97X-D/6-31++G(d,p) level of theory. The calculations are performed at 278 K and 1 atm.

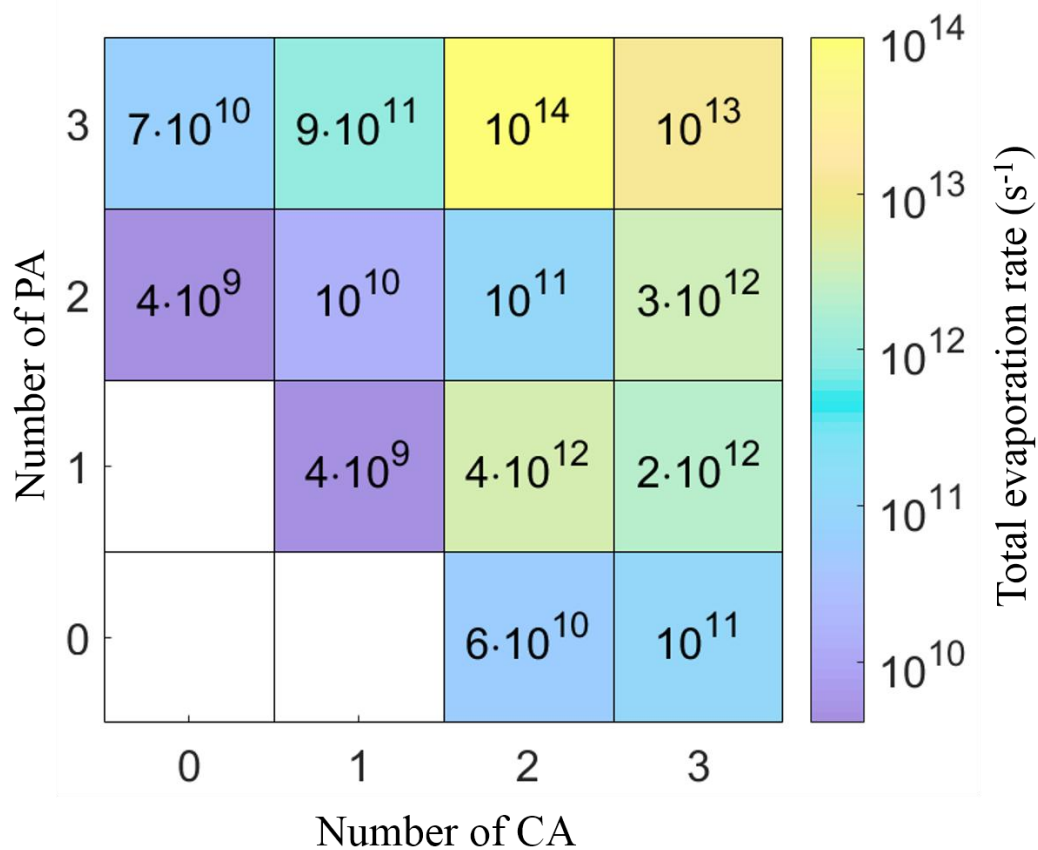

**Figure S15.** Evaporation rates for  $(CA)_m(PA)_n$  clusters ( $m = 0-3$  and  $n = 0-3$ ), at 278 K and 1 atm.

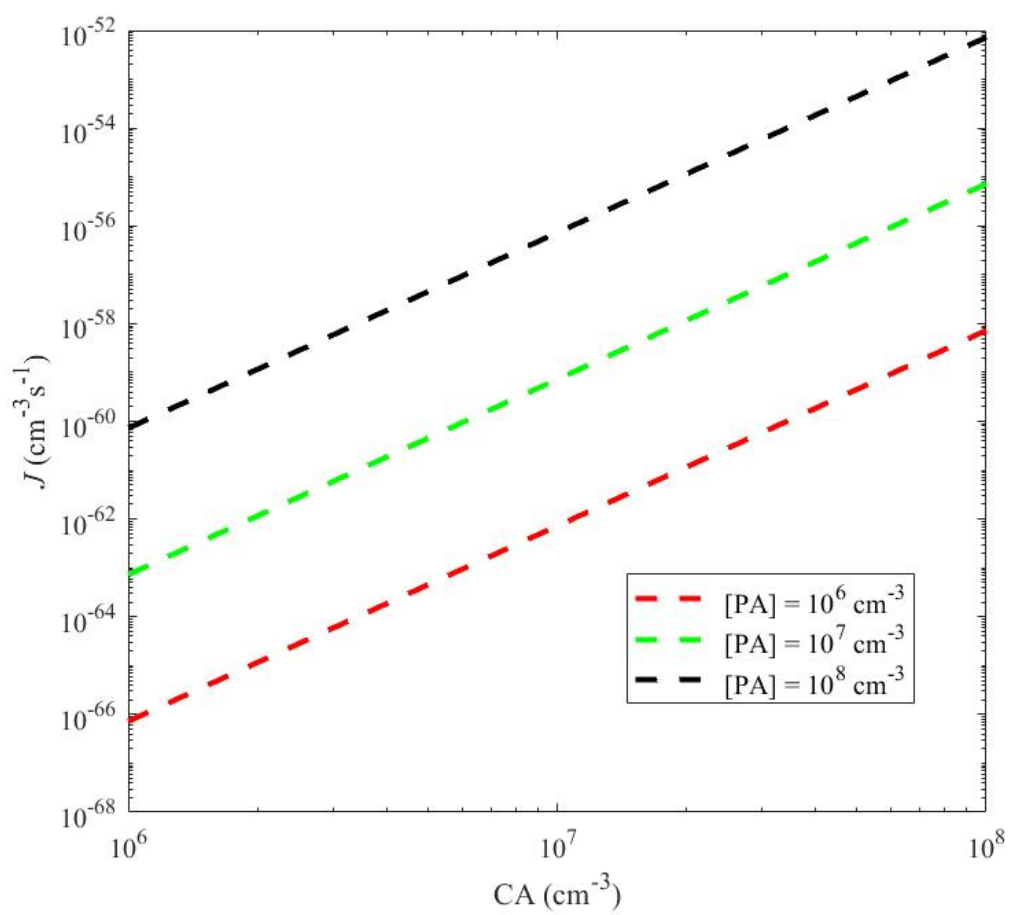

**Figure S16.** The simulated cluster formation rate  $J$  ( $\text{cm}^{-3} \text{s}^{-1}$ ) of CA–PA system at 278 K with different  $[\text{CA}]$  ( $10^6$ – $10^8 \text{ cm}^{-3}$ ), and  $\text{CS} = 2 \times 10^{-3} \text{ s}^{-1}$ .

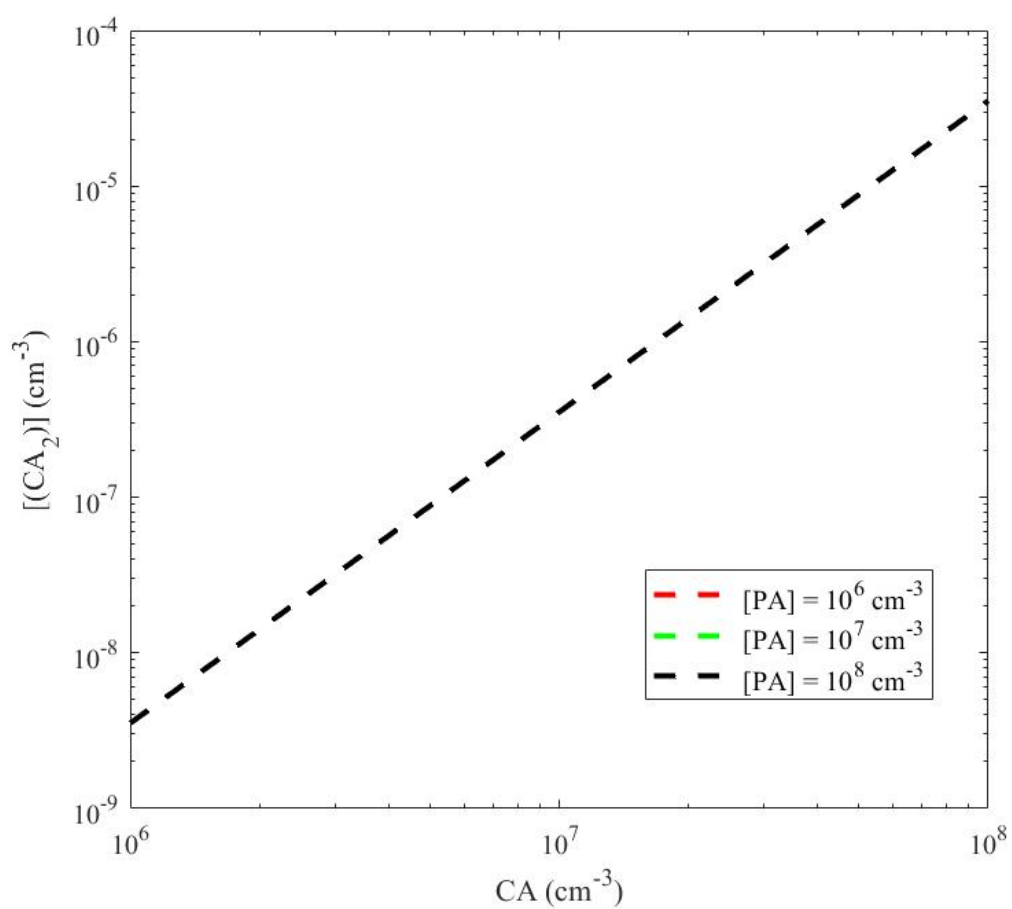

**Figure S17.** The simulated steady-state CA dimer concentration of CA–PA cluster system at 278 K with different  $[PA]$  ( $10^6$ – $10^8 cm^{-3}$ ), and  $CS = 2 \times 10^{-3} s^{-1}$ .

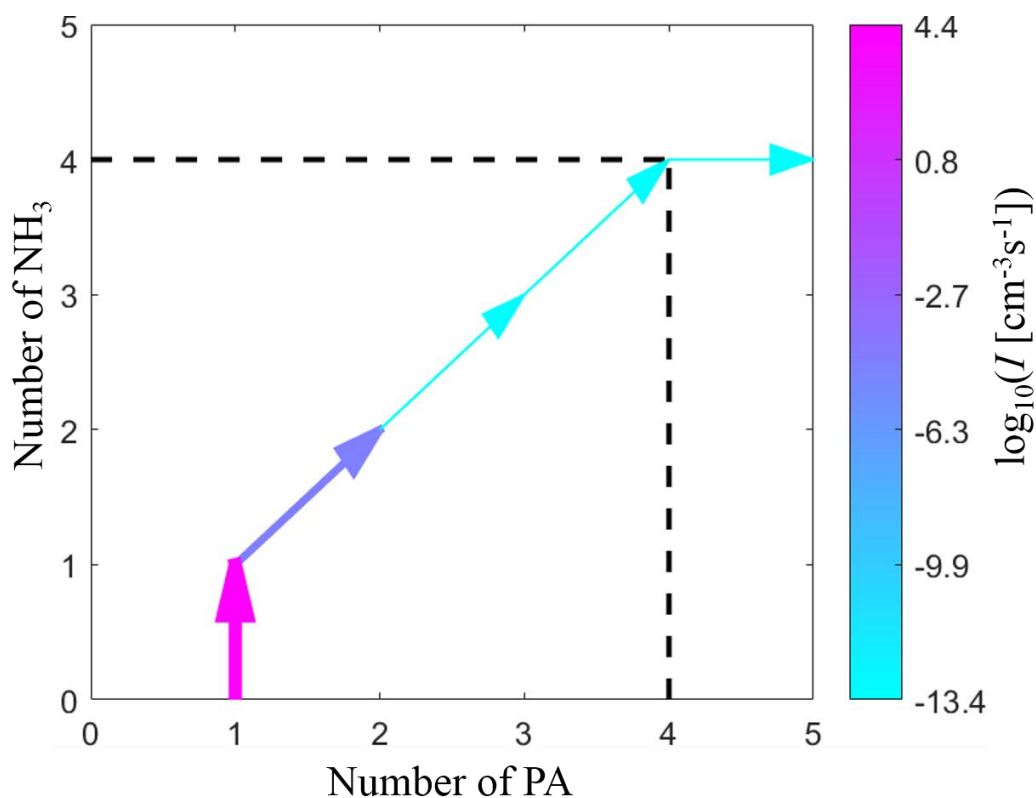

**Figure S18.** Main clustering pathways of  $(\text{CA})_m(\text{PA})_n$  ( $m = 0-3$  and  $n = 0-3$ ) clusters at 278 K,  $[\text{CA}] = 10^7 \text{ cm}^{-3}$ , and  $[\text{PA}] = 10^7 \text{ cm}^{-3}$ .

**Table S1.** Coordinates of all optimized clusters

| $(\text{DMA})_2$ | x           | y           | z           |
|------------------|-------------|-------------|-------------|
| C                | -1.84310200 | -1.20568500 | -0.22374200 |
| H                | -1.00916100 | -1.24346100 | -0.92613900 |
| H                | -1.79434700 | -2.08539200 | 0.41559800  |
| H                | -2.77568800 | -1.24197500 | -0.80161300 |
| H                | -2.41106500 | 0.00381100  | 1.31323200  |
| C                | -1.83919100 | 1.20255500  | -0.23076900 |
| H                | -2.77142500 | 1.23816000  | -0.80926000 |
| H                | 2.53913600  | 1.24215600  | 1.01792000  |
| H                | -1.00471700 | 1.23383100  | -0.93282500 |

|   |             |             |             |
|---|-------------|-------------|-------------|
| N | -1.71465200 | 0.00056500  | 0.58008200  |
| C | 2.04890400  | 1.20555100  | 0.03443900  |
| H | 2.82818300  | 1.28012200  | -0.72589900 |
| H | 1.40469500  | 2.07894100  | -0.05946300 |
| H | -1.78831600 | 2.08577400  | 0.40356300  |
| H | 0.46623900  | -0.00706000 | 0.43535600  |
| C | 2.06200700  | -1.20144500 | 0.02873800  |
| H | 2.55239300  | -1.23754900 | 1.01217100  |
| H | 1.42760400  | -2.08148700 | -0.06980800 |
| H | 2.84229700  | -1.26364800 | -0.73169600 |
| N | 1.27500400  | -0.00171900 | -0.17910000 |

| (DMA) <sub>3</sub> | x           | y           | z           |
|--------------------|-------------|-------------|-------------|
| C                  | -2.45662200 | -0.64779100 | 1.19336100  |
| H                  | -3.06800000 | -1.53512000 | 1.36820100  |
| H                  | -1.75697700 | -0.55596600 | 2.02406600  |
| H                  | -3.12569100 | 0.22530100  | 1.20951100  |
| H                  | -1.06824100 | -0.01795700 | -0.14320500 |
| C                  | -2.60912700 | -0.82233900 | -1.20041300 |
| H                  | -3.28776800 | 0.04172100  | -1.25313600 |
| H                  | -2.02138000 | -0.85159000 | -2.11727600 |
| H                  | -3.22472100 | -1.72314900 | -1.16905800 |
| N                  | -1.72658100 | -0.79009500 | -0.05090800 |
| C                  | 1.77652600  | -1.49114800 | -1.19555700 |
| H                  | 0.72110200  | -1.22162900 | -1.25483900 |
| H                  | 2.29043700  | -1.09392100 | -2.06931300 |
| H                  | 1.84038700  | -2.58626600 | -1.21525400 |
| H                  | 3.32901100  | -1.08853200 | 0.06160600  |
| C                  | 1.68074700  | -1.43039100 | 1.20970500  |
| H                  | 1.74550200  | -2.52257700 | 1.29298900  |
| H                  | 2.12026700  | -0.98419700 | 2.10041400  |
| H                  | 0.62227300  | -1.16820200 | 1.16698900  |
| N                  | 2.33476200  | -0.90803500 | 0.01730900  |
| C                  | 0.25940700  | 2.11911600  | 1.22505600  |
| H                  | -0.73483300 | 2.56575300  | 1.28808800  |
| H                  | 0.34655300  | 1.37948100  | 2.02019800  |
| H                  | 0.99563400  | 2.91337900  | 1.40846300  |
| H                  | 1.27778700  | 0.91671400  | -0.06605600 |
| C                  | 0.43251900  | 2.41927800  | -1.16298200 |
| H                  | 1.18371000  | 3.21198200  | -1.04542500 |
| H                  | 0.62662000  | 1.89684000  | -2.09858200 |
| H                  | -0.54518400 | 2.89812900  | -1.24189700 |
| N                  | 0.42507700  | 1.47233800  | -0.06375900 |

| (DMA) <sub>4</sub> |          | x        | y        | z |
|--------------------|----------|----------|----------|---|
| N                  | -1.00242 | 1.79381  | -0.42657 |   |
| H                  | -1.37401 | 0.84766  | -0.28175 |   |
| H                  | 0.84838  | 1.37469  | 0.28065  |   |
| N                  | 1.79428  | 1.00270  | 0.42607  |   |
| C                  | 2.76803  | 1.93152  | -0.11997 |   |
| C                  | 2.00142  | 0.73230  | 1.83818  |   |
| C                  | -0.73179 | 2.00206  | -1.83847 |   |
| C                  | -1.93191 | 2.76666  | 0.11996  |   |
| H                  | -2.15013 | 2.51762  | 1.16244  |   |
| H                  | -2.88834 | 2.81606  | -0.43008 |   |
| H                  | -1.48390 | 3.76716  | 0.09933  |   |
| H                  | -0.24155 | 2.97196  | -1.98583 |   |
| H                  | -1.63841 | 1.98551  | -2.46839 |   |
| H                  | -0.04906 | 1.22534  | -2.19748 |   |
| H                  | 2.97089  | 0.24148  | 1.98636  |   |
| H                  | 1.98498  | 1.63909  | 2.46787  |   |
| H                  | 1.22400  | 0.05017  | 2.19685  |   |
| H                  | 2.81764  | 2.88801  | 0.42993  |   |
| H                  | 3.76825  | 1.48290  | -0.09858 |   |
| H                  | 2.51988  | 2.14973  | -1.16267 |   |
| N                  | 1.00279  | -1.79417 | -0.42569 |   |
| H                  | 1.37476  | -0.84817 | -0.28094 |   |
| C                  | 0.73122  | -2.00200 | -1.83748 |   |
| C                  | 1.93222  | -2.76753 | 0.11997  |   |
| H                  | 0.04863  | -1.22488 | -2.19593 |   |
| H                  | 1.63747  | -1.98569 | -2.46794 |   |
| H                  | 0.24046  | -2.97164 | -1.98476 |   |
| H                  | 1.48377  | -3.76784 | 0.09929  |   |
| H                  | 2.88828  | -2.81718 | -0.43068 |   |
| H                  | 2.15123  | -2.51895 | 1.16241  |   |
| N                  | -1.79380 | -1.00257 | 0.42642  |   |
| H                  | -0.84768 | -1.37455 | 0.28266  |   |
| C                  | -2.00317 | -0.73093 | 1.83797  |   |
| C                  | -2.76664 | -1.93192 | -0.12036 |   |
| H                  | -2.81697 | -2.88799 | 0.43022  |   |
| H                  | -3.76694 | -1.48340 | -0.10078 |   |
| H                  | -2.51692 | -2.15091 | -1.16251 |   |
| H                  | -1.98757 | -1.63714 | 2.46850  |   |
| H                  | -2.97294 | -0.24012 | 1.98421  |   |
| H                  | -1.22642 | -0.04831 | 2.19720  |   |

| (CA) <sub>2</sub> | x           | y           | z           |
|-------------------|-------------|-------------|-------------|
| O                 | -1.34215900 | -0.48622400 | 1.31847000  |
| O                 | -1.28894400 | 1.22226200  | -0.39685700 |
| Cl                | -2.15920400 | 0.15966800  | 0.08651500  |
| H                 | 0.40891000  | 1.34932700  | -0.01396200 |
| O                 | -2.29789900 | -0.87958100 | -0.88347600 |
| O                 | 0.92018700  | -1.07550500 | -0.08705900 |
| O                 | 1.35275300  | 1.27394100  | 0.26605500  |
| Cl                | 1.93748300  | -0.08996100 | -0.40277800 |
| H                 | -0.48465800 | -0.81267000 | 0.94622900  |
| O                 | 3.13668900  | -0.27010200 | 0.33839200  |

| (CA) <sub>3</sub> | x           | y           | z           |
|-------------------|-------------|-------------|-------------|
| O                 | -2.04844600 | -1.16000700 | 1.24085300  |
| O                 | -0.47425900 | -1.01724800 | -0.66340500 |
| Cl                | -1.82263400 | -1.58448200 | -0.35013200 |
| H                 | -2.10773300 | -0.17615900 | 1.24428000  |
| O                 | -1.80425400 | -3.03995500 | -0.25459000 |
| O                 | 1.90801000  | -1.40173300 | 0.60540600  |
| O                 | 1.94134300  | 0.87759800  | -0.33750500 |
| Cl                | 2.76665700  | -0.36075000 | -0.36529500 |
| H                 | 0.98798400  | -1.43531100 | 0.23296600  |
| O                 | 4.01335200  | -0.23866100 | 0.37856600  |
| O                 | -0.24892200 | 1.43734200  | 1.17357500  |
| O                 | -1.01711500 | 3.37528300  | -0.20981400 |
| Cl                | -0.92754100 | 1.92003500  | -0.28119200 |
| H                 | 0.70869600  | 1.29741300  | 0.98273500  |
| O                 | -2.25335400 | 1.26018200  | -0.12276800 |

| (PA) <sub>1</sub> | x           | y           | z           |
|-------------------|-------------|-------------|-------------|
| O                 | 1.48408000  | 0.34314700  | -0.00080400 |
| O                 | -0.36646400 | -0.78243600 | -1.20962900 |
| Cl                | -0.15078600 | -0.01401100 | -0.00026500 |
| H                 | 1.94484000  | -0.51441900 | 0.00217300  |
| O                 | -0.36714200 | -0.77556200 | 1.21332600  |
| O                 | -0.72081500 | 1.30691900  | -0.00417900 |

| (PA) <sub>2</sub> | x           | y           | z           |
|-------------------|-------------|-------------|-------------|
| O                 | 1.48408000  | 0.34314700  | -0.00080400 |
| O                 | -0.36646400 | -0.78243600 | -1.20962900 |
| Cl                | -0.15078600 | -0.01401100 | -0.00026500 |
| H                 | 1.94484000  | -0.51441900 | 0.00217300  |

|   |             |             |             |
|---|-------------|-------------|-------------|
| O | -0.36714200 | -0.77556200 | 1.21332600  |
| O | -0.72081500 | 1.30691900  | -0.00417900 |

| (PA) <sub>3</sub> | x           | y           | z           |
|-------------------|-------------|-------------|-------------|
| O                 | -0.61216400 | -2.87669100 | -0.38977900 |
| O                 | -1.17436200 | -1.01677900 | 1.13965200  |
| Cl                | -1.71213600 | -1.72721600 | -0.00274500 |
| H                 | 0.22796800  | -2.38767500 | -0.57406600 |
| O                 | -1.80220400 | -0.86651000 | -1.18865500 |
| O                 | -2.89417400 | -2.50182000 | 0.24003200  |
| O                 | -0.46309600 | 1.56587200  | -1.26691800 |
| O                 | -0.60459600 | 3.74286800  | -0.24816400 |
| Cl                | -0.80047100 | 2.36894800  | 0.12162500  |
| H                 | -0.92457200 | 0.69069100  | -1.21984400 |
| O                 | -2.14945200 | 1.99623500  | 0.48406800  |
| O                 | 0.19720500  | 1.90178900  | 1.08805900  |
| O                 | 1.82761700  | -0.29219100 | 1.40502100  |
| O                 | 3.40101900  | -1.65408400 | 0.22225200  |
| Cl                | 2.47559700  | -0.59188200 | -0.06364400 |
| H                 | 1.17087800  | 0.44089200  | 1.28839700  |
| O                 | 1.34121700  | -1.01771800 | -0.90116500 |
| O                 | 3.05081700  | 0.64263700  | -0.53551100 |

| (PA) <sub>4</sub> | x           | y           | z           |
|-------------------|-------------|-------------|-------------|
| O                 | -0.55189000 | -2.28845900 | 1.84786700  |
| O                 | 0.92329400  | -0.29795900 | 1.75036700  |
| Cl                | 0.97131200  | -1.74029600 | 1.64367800  |
| H                 | -1.08407400 | -2.01431500 | 1.05948800  |
| O                 | 1.67746100  | -2.40907500 | 2.69841900  |
| O                 | 1.35291400  | -2.17489700 | 0.29305800  |
| O                 | -0.24589200 | 2.39029800  | 1.17507800  |
| O                 | -1.88976100 | 0.54486400  | 1.41126900  |
| Cl                | -1.80150200 | 1.94259800  | 1.03961800  |
| H                 | 0.29237600  | 1.91699300  | 0.48913200  |
| O                 | -2.45809000 | 2.85551200  | 1.93008900  |
| O                 | -2.14387400 | 2.13965100  | -0.37784100 |
| O                 | 2.48081600  | -0.45445800 | -1.60820200 |
| O                 | 1.38669100  | 1.64097400  | -0.88861200 |
| Cl                | 2.72104500  | 1.04187700  | -0.99363000 |
| H                 | 2.01484600  | -0.99224700 | -0.92096800 |
| O                 | 3.35408300  | 0.85984300  | 0.29397500  |
| O                 | 3.52839300  | 1.65678800  | -2.00950600 |

|    |             |             |             |
|----|-------------|-------------|-------------|
| O  | -2.92361300 | -0.06855000 | -1.84346100 |
| O  | -0.52901400 | -0.44060800 | -1.42656900 |
| Cl | -1.75920800 | -1.18842400 | -1.61334300 |
| H  | -2.68265600 | 0.71608300  | -1.28520500 |
| O  | -2.14497700 | -1.92001000 | -0.40500400 |
| O  | -1.83841400 | -1.98146700 | -2.80684000 |

| (PA) <sub>5</sub> | x           | y           | z           |
|-------------------|-------------|-------------|-------------|
| O                 | 1.80267400  | 2.88206300  | -0.79582500 |
| O                 | 0.12232200  | 1.08266600  | -0.91126100 |
| Cl                | 0.23729300  | 2.53718200  | -1.12189900 |
| H                 | 1.98334600  | 2.49933400  | 0.09747500  |
| O                 | -0.56227100 | 3.27813700  | -0.18074400 |
| O                 | 0.11646900  | 2.92366600  | -2.50076300 |
| O                 | 1.06449600  | -0.83952800 | -2.67164700 |
| O                 | 3.05869300  | 0.13739200  | -1.58713800 |
| Cl                | 2.42995300  | -1.14468200 | -1.82655400 |
| H                 | 0.56665900  | -0.16058800 | -2.15182400 |
| O                 | 1.98634900  | -1.78017800 | -0.57765200 |
| O                 | 3.13533900  | -2.04330500 | -2.69279400 |
| O                 | -3.11288700 | -2.56442100 | -0.61648000 |
| O                 | -0.99757500 | -1.34233100 | -0.32871700 |
| Cl                | -1.51947200 | -2.71501700 | -0.27239300 |
| H                 | -3.45403700 | -1.85823300 | -0.01154300 |
| O                 | -1.42716700 | -3.27834500 | 1.05483500  |
| O                 | -1.04957900 | -3.55156300 | -1.34038700 |
| O                 | 0.96027100  | -0.51831900 | 1.58692000  |
| O                 | 1.72741400  | 0.38520800  | 3.69208900  |
| Cl                | 2.06754300  | 0.46884500  | 2.30016100  |
| H                 | 1.38272600  | -0.90736600 | 0.77490100  |
| O                 | 3.35949500  | -0.05839600 | 1.92204600  |
| O                 | 1.80473000  | 1.79745200  | 1.74290500  |
| O                 | -1.63526700 | 0.72222200  | 1.60812400  |
| O                 | -3.00396100 | 1.17287300  | -0.41079200 |
| Cl                | -3.14518700 | 0.81391800  | 0.98261100  |
| H                 | -1.13387900 | 0.07161200  | 1.06364800  |
| O                 | -3.71403100 | -0.53144600 | 1.15504200  |
| O                 | -3.76158600 | 1.79707500  | 1.82621700  |

| (PA) <sub>6</sub> | x          | y          | z          |
|-------------------|------------|------------|------------|
| O                 | 1.95432500 | 2.62153500 | 1.46165800 |

|    |             |             |             |
|----|-------------|-------------|-------------|
| O  | 3.36790200  | 0.64785100  | 0.97152300  |
| Cl | 2.74039000  | 1.77060900  | 0.31117900  |
| H  | 1.01504500  | 2.30413300  | 1.48807500  |
| O  | 1.68330600  | 1.34230400  | -0.62058200 |
| O  | 3.65090200  | 2.73255000  | -0.24236900 |
| O  | 1.10317800  | -1.37644500 | -0.88809900 |
| O  | 2.12453500  | -3.28554300 | -1.94095600 |
| Cl | 2.53709500  | -2.07570100 | -1.28528700 |
| H  | 1.26061600  | -0.40224600 | -0.79297000 |
| O  | 3.23597900  | -1.11392200 | -2.10604000 |
| O  | 3.20635700  | -2.31818800 | -0.00467700 |
| O  | 2.35382800  | -1.87794400 | 2.58608200  |
| O  | 0.45634400  | -1.45081200 | 3.97137900  |
| Cl | 0.76942200  | -1.50198300 | 2.57328100  |
| H  | 2.64476400  | -1.96995600 | 1.64344500  |
| O  | 0.64011100  | -0.24737800 | 1.85963800  |
| O  | 0.11873500  | -2.60082000 | 1.84889800  |
| O  | -0.77033700 | 3.28512000  | -0.76629400 |
| O  | -2.81665500 | 2.23668000  | 0.15688300  |
| Cl | -1.63123200 | 2.94285400  | 0.58621400  |
| H  | -0.65763500 | 2.42373000  | -1.24232200 |
| O  | -0.75131700 | 2.08972300  | 1.39216500  |
| O  | -1.85082200 | 4.24732600  | 1.14714600  |
| O  | -1.65668200 | -1.89969600 | -0.18966600 |
| O  | -3.51467300 | -2.78162900 | 1.20494300  |
| Cl | -2.97100300 | -1.53560300 | 0.72433400  |
| H  | -0.94191500 | -2.18477500 | 0.43197600  |
| O  | -2.50951300 | -0.64248100 | 1.76255600  |
| O  | -3.81079200 | -0.89466500 | -0.28380700 |
| O  | -3.05662300 | 0.49715600  | -2.53769300 |
| O  | -1.34967900 | 1.15625000  | -4.07541400 |
| Cl | -1.49322500 | 0.27844400  | -2.94569700 |
| H  | -3.22929300 | -0.00901100 | -1.70196100 |
| O  | -0.72795800 | 0.72093500  | -1.76619200 |
| O  | -1.30500900 | -1.12567200 | -3.20754300 |

| (PA) <sub>i</sub> (DMA) <sub>i</sub> | x          | y           | z           |
|--------------------------------------|------------|-------------|-------------|
| C                                    | 3.12709700 | -0.87752900 | -0.08043500 |
| H                                    | 3.90015700 | -0.51621000 | 0.59934000  |
| H                                    | 2.95048600 | -1.94014300 | 0.08380900  |
| H                                    | 3.43778500 | -0.71211900 | -1.11248900 |

|    |             |             |             |
|----|-------------|-------------|-------------|
| H  | 1.06996600  | -0.48200200 | -0.46000100 |
| C  | 1.97275700  | 1.33324500  | -0.03849200 |
| H  | 2.27927100  | 1.52000800  | -1.06826300 |
| H  | 0.98742700  | 1.76934400  | 0.13571700  |
| H  | 2.70869700  | 1.74177600  | 0.65526100  |
| N  | 1.87154800  | -0.13637600 | 0.15895600  |
| H  | 1.48838700  | -0.31569700 | 1.09444700  |
| O  | -2.60108000 | -0.70945200 | 0.00369200  |
| O  | -1.40733500 | 1.37465700  | -0.33704100 |
| Cl | -1.30839100 | -0.05055000 | -0.00006700 |
| O  | -0.62063400 | -0.19563100 | 1.31431200  |
| O  | -0.40588900 | -0.71773400 | -1.02169000 |

| (PA) <sub>1</sub> (DMA) <sub>2</sub> | x           | y           | z           |
|--------------------------------------|-------------|-------------|-------------|
| C                                    | 1.76443000  | -1.75041800 | 1.29961000  |
| H                                    | 2.21306300  | 1.85116400  | 1.71307700  |
| H                                    | 0.91601400  | -1.43539900 | 1.91039100  |
| H                                    | 1.82970500  | -2.84716600 | 1.32539400  |
| H                                    | 0.65607900  | -1.51600500 | -0.39197500 |
| C                                    | 2.60069000  | -1.70619200 | -0.99260300 |
| H                                    | 2.66950100  | -2.80277600 | -1.02505700 |
| H                                    | 2.36947900  | -1.34561200 | -1.99824500 |
| H                                    | 3.58027000  | -1.31384700 | -0.69880300 |
| N                                    | 1.58144700  | -1.23661100 | -0.05795300 |
| C                                    | 1.92454300  | 2.15344800  | -1.01252800 |
| H                                    | 2.97599100  | 2.05895900  | -0.73329500 |
| H                                    | 1.76342600  | 1.70022900  | -1.99135400 |
| H                                    | 1.65016700  | 3.20931800  | -1.05305400 |
| H                                    | 0.08856600  | 1.47335300  | -0.32498900 |
| C                                    | 1.18957800  | 1.97594300  | 1.35307600  |
| H                                    | 0.92009600  | 3.03385100  | 1.36742200  |
| H                                    | 0.49527800  | 1.41108300  | 1.97514500  |
| H                                    | 2.68808300  | -1.34371900 | 1.72623100  |
| N                                    | 1.08821300  | 1.45303400  | -0.02305900 |
| H                                    | 1.33875900  | 0.39306100  | -0.02347000 |
| O                                    | -3.30502300 | -0.33138800 | 0.00445300  |
| O                                    | -1.18276200 | -0.19640200 | 1.19051800  |
| Cl                                   | -1.86243000 | -0.18114600 | -0.13325100 |
| O                                    | -1.28704400 | -1.26040500 | -0.97393900 |
| O                                    | -1.54496300 | 1.14133400  | -0.78108700 |

| (PA) <sub>1</sub> (DMA) <sub>3</sub> | x | y | z |
|--------------------------------------|---|---|---|
|--------------------------------------|---|---|---|

|    |             |             |             |
|----|-------------|-------------|-------------|
| C  | -3.55464000 | 1.16002200  | -0.25497800 |
| H  | -3.63694100 | 2.24422900  | -0.11695900 |
| H  | -3.46348300 | 0.95154700  | -1.32429600 |
| H  | -4.48649000 | 0.70154000  | 0.10812800  |
| H  | -2.22364300 | -0.31775400 | 0.19722300  |
| C  | -2.44740500 | 0.80344800  | 1.88851000  |
| H  | -1.56693600 | 0.33476100  | 2.33295700  |
| H  | -2.46242400 | 1.86656900  | 2.15553100  |
| H  | -3.34668900 | 0.33382300  | 2.31365800  |
| N  | -2.37251000 | 0.66230500  | 0.43831000  |
| C  | 2.44920700  | 0.79823900  | 1.88843500  |
| H  | 0.89519800  | 3.52980200  | -0.72676300 |
| H  | 1.56765400  | 0.33140000  | 2.33267900  |
| H  | 3.34739900  | 0.32652900  | 2.31358200  |
| H  | 2.22319900  | -0.32214900 | 0.19694300  |
| C  | 3.55744900  | 1.15279500  | -0.25487500 |
| H  | 4.48824400  | 0.69218900  | 0.10824600  |
| H  | 3.46593500  | 0.94471900  | -1.32424100 |
| H  | 3.64212700  | 2.23679200  | -0.11665100 |
| N  | 2.37415500  | 0.65755500  | 0.43819800  |
| C  | 0.00145200  | 1.31896700  | -2.05920100 |
| H  | 0.89460700  | 1.74649000  | -2.52093600 |
| H  | 0.00056300  | 0.23618400  | -2.18490300 |
| H  | -0.89106900 | 1.74789400  | -2.52086400 |
| H  | -0.87651900 | 1.19325400  | -0.17115300 |
| C  | 0.00287200  | 3.06044200  | -0.30621500 |
| H  | -0.88879800 | 3.53115400  | -0.72664100 |
| H  | 0.00304500  | 3.18912600  | 0.77743600  |
| H  | 2.46655200  | 1.86126900  | 2.15567200  |
| N  | 0.00174800  | 1.62176600  | -0.61429400 |
| H  | 0.87936700  | 1.19189600  | -0.17116900 |
| O  | -0.00336800 | -3.44881900 | 0.10141800  |
| O  | -0.00100900 | -1.19596000 | 1.00882900  |
| Cl | -0.00195500 | -2.02629500 | -0.23095400 |
| O  | 1.20729300  | -1.66960000 | -1.02415000 |
| O  | -1.21042100 | -1.66708400 | -1.02421000 |

| (PA) <sub>i</sub> (DMA) <sub>4</sub> | x           | y           | z          |
|--------------------------------------|-------------|-------------|------------|
| C                                    | -3.45107900 | -1.45829700 | 0.62615300 |
| H                                    | -3.49333100 | -2.33301000 | 1.28501200 |
| H                                    | -3.46629200 | -0.56083100 | 1.24936400 |
| H                                    | -4.35942000 | -1.46092700 | 0.00416600 |

|    |             |             |             |
|----|-------------|-------------|-------------|
| H  | -2.24438300 | 0.94168800  | 2.27323800  |
| C  | -2.19882400 | -2.61823300 | -1.09825100 |
| H  | -3.08172000 | -2.64150100 | -1.75450300 |
| H  | -1.30379700 | -2.54042600 | -1.71890100 |
| H  | -2.16815300 | -3.56209000 | -0.54126500 |
| N  | -2.22589100 | -1.49505300 | -0.16270000 |
| C  | 3.46458200  | -0.53636000 | -0.03869800 |
| H  | 3.84274900  | -1.36987900 | 0.56476800  |
| H  | 3.06739300  | -0.92886200 | -0.97719000 |
| H  | 4.30893100  | 0.13144300  | -0.26402200 |
| H  | 1.98108200  | 0.83390800  | 0.04988700  |
| C  | 2.82356400  | 0.77927600  | 1.91507800  |
| H  | 1.96415200  | 1.26542300  | 2.38334200  |
| H  | 3.21304600  | 0.01904400  | 2.60224300  |
| H  | 3.61580600  | 1.52622600  | 1.75574300  |
| N  | 2.38822300  | 0.14143700  | 0.67878500  |
| C  | 0.15868000  | 3.02382800  | 1.18666200  |
| H  | -0.80933800 | -2.06084000 | 2.90247300  |
| H  | 0.94667300  | 2.90881200  | 0.43905600  |
| H  | -0.50140800 | 3.84187700  | 0.85375200  |
| H  | -0.83122100 | 1.43909200  | 0.42877800  |
| C  | -1.71868000 | 1.89907500  | 2.19840000  |
| H  | -2.43538800 | 2.65567500  | 1.83624300  |
| H  | -2.12739800 | -0.63234700 | -0.69941100 |
| H  | -1.41278700 | 2.18979000  | 3.21063600  |
| N  | -0.54382400 | 1.75706300  | 1.35327600  |
| C  | 0.77873500  | -2.87676900 | 0.77495700  |
| H  | 0.04735900  | -3.64370300 | 1.04023400  |
| H  | 0.94089100  | -2.87475600 | -0.30303700 |
| H  | 1.72153900  | -3.07522100 | 1.28973800  |
| H  | 1.02232400  | -0.82411300 | 0.89083300  |
| C  | 0.00993900  | -1.40154800 | 2.60564500  |
| H  | 0.90890300  | -1.65729600 | 3.17135300  |
| H  | -0.25154000 | -0.35818000 | 2.78753300  |
| H  | 0.61462200  | 3.32554500  | 2.13747600  |
| N  | 0.27556500  | -1.54839400 | 1.16511200  |
| H  | -0.62529300 | -1.38336200 | 0.63629300  |
| O  | -1.15753100 | 0.89766600  | -1.55603500 |
| O  | 0.50935700  | -0.84756400 | -1.69309000 |
| Cl | 0.15162100  | 0.51761000  | -2.17167600 |
| O  | 0.04634000  | 0.53619300  | -3.62877900 |
| O  | 1.18465800  | 1.47396100  | -1.70259900 |

| (PA) <sub>2</sub> (DMA) <sub>1</sub> | x           | y           | z           |
|--------------------------------------|-------------|-------------|-------------|
| O                                    | -1.51177600 | -1.80840900 | -0.35554900 |
| O                                    | -1.72902000 | 0.03071900  | 1.25890300  |
| Cl                                   | -2.18803900 | -0.39329200 | -0.05901100 |
| H                                    | -0.52372100 | -1.79473900 | -0.03470400 |
| O                                    | -1.71163200 | 0.53496200  | -1.09435100 |
| O                                    | -3.59919400 | -0.66054000 | -0.15657800 |
| C                                    | -0.22052600 | 3.00038200  | 0.97595800  |
| H                                    | -0.85628300 | 3.70412400  | 0.43734200  |
| H                                    | -0.82692300 | 2.37263600  | 1.62793500  |
| H                                    | 0.52408200  | 3.54135700  | 1.56063900  |
| H                                    | 1.05324800  | 1.42003900  | 0.50760800  |
| C                                    | 1.34413500  | 2.84294300  | -0.96334900 |
| H                                    | 2.11413300  | 3.38223700  | -0.41095200 |
| H                                    | 1.80232200  | 2.10067100  | -1.61593900 |
| H                                    | 0.73887000  | 3.54149500  | -1.54234300 |
| N                                    | 0.47518100  | 2.12851400  | 0.00201400  |
| H                                    | -0.21970800 | 1.57042600  | -0.51544100 |
| O                                    | 0.86269500  | -1.94413800 | 0.50576800  |
| O                                    | 3.18760600  | -1.65897900 | -0.08487200 |
| Cl                                   | 1.91962500  | -0.97038800 | 0.05446800  |
| O                                    | 1.46170300  | -0.35025100 | -1.20888000 |
| O                                    | 2.01805700  | 0.11102000  | 1.08562100  |

| (PA) <sub>2</sub> (DMA) <sub>2</sub> | x           | y           | z           |
|--------------------------------------|-------------|-------------|-------------|
| C                                    | -0.54929500 | -3.21630300 | 1.04909800  |
| H                                    | -0.03099800 | -4.17601300 | 1.05724200  |
| H                                    | -0.51766400 | -2.76376900 | 2.03980400  |
| H                                    | -1.58640700 | -3.34455900 | 0.73747700  |
| H                                    | -1.58395000 | 3.34675600  | 0.73541900  |
| C                                    | 0.14585700  | -2.79856200 | -1.30350900 |
| H                                    | -0.88090400 | -2.90597000 | -1.65243700 |
| H                                    | 0.67518300  | -2.06326200 | -1.90790500 |
| H                                    | 0.66737400  | -3.75637400 | -1.33166200 |
| N                                    | 0.11843100  | -2.30596500 | 0.09295900  |
| H                                    | 1.08014000  | -2.08326100 | 0.40774800  |
| O                                    | -2.65425500 | 1.21896800  | -0.86713700 |
| O                                    | -3.74037600 | 0.00157500  | 0.92964700  |
| Cl                                   | -2.64732000 | 0.00120100  | -0.03500500 |
| O                                    | -2.65484600 | -1.21676300 | -0.86683600 |
| O                                    | -1.32014400 | 0.00096600  | 0.72255300  |

|    |             |             |             |
|----|-------------|-------------|-------------|
| C  | 0.14791700  | 2.79790100  | -1.30518800 |
| H  | 0.67029500  | 3.75522300  | -1.33407700 |
| H  | 0.67658000  | 2.06167200  | -1.90903300 |
| H  | -0.87875200 | 2.90596800  | -1.65418300 |
| H  | -0.37742300 | 1.39666200  | 0.13170900  |
| C  | -0.54691500 | 3.21798800  | 1.04709200  |
| H  | -0.37829200 | -1.39582000 | 0.13233400  |
| H  | -0.51556200 | 2.76623900  | 2.03816500  |
| H  | -0.02789700 | 4.17731500  | 1.05442300  |
| N  | 0.12006900  | 2.30637500  | 0.09165600  |
| H  | 1.08159800  | 2.08313600  | 0.40660500  |
| O  | 4.04394600  | -0.00158800 | -0.61612900 |
| O  | 2.59769900  | -1.21515000 | 0.90462800  |
| Cl | 2.75037300  | -0.00079600 | 0.05167700  |
| O  | 2.59869500  | 1.21433400  | 0.90367800  |
| O  | 1.63306600  | -0.00073100 | -0.93943900 |

| (PA) <sub>2</sub> (DMA) <sub>3</sub> | x           | y           | z           |
|--------------------------------------|-------------|-------------|-------------|
| C                                    | -0.94039800 | 3.70046000  | 0.80656300  |
| H                                    | -1.52901600 | 4.52156300  | 0.39495300  |
| H                                    | -1.35492100 | 3.38648400  | 1.76431700  |
| H                                    | 0.10130300  | 3.99686100  | 0.93387700  |
| H                                    | -0.40923900 | 1.78437400  | 0.28408300  |
| C                                    | -0.48082700 | 2.83778800  | -1.48598100 |
| H                                    | 0.55902800  | 3.15741600  | -1.41440500 |
| H                                    | -0.54819600 | 1.91997600  | -2.06915000 |
| H                                    | -1.09503400 | 3.61858900  | -1.93671900 |
| N                                    | -0.98821200 | 2.55028500  | -0.12313000 |
| H                                    | 3.35412600  | -2.39440000 | -1.91427000 |
| O                                    | 3.22086700  | 0.48545700  | 1.21517200  |
| O                                    | 2.30135000  | 2.68297500  | 0.69504300  |
| Cl                                   | 2.19867400  | 1.23162100  | 0.47057600  |
| O                                    | 2.28646300  | 0.93875400  | -0.97819500 |
| O                                    | 0.84162100  | 0.77687000  | 0.95274900  |
| C                                    | 0.67488200  | -2.68876500 | -2.15931600 |
| H                                    | -0.29729200 | -4.06525400 | 1.02667400  |
| H                                    | -0.33088000 | -2.27261300 | -2.24792700 |
| H                                    | 1.16940400  | -2.65284600 | -3.14054700 |
| H                                    | 1.43355200  | -0.95847400 | -1.37230900 |
| C                                    | 2.79183700  | -2.40815100 | -0.97014800 |
| H                                    | 2.79139000  | -3.43546200 | -0.58876500 |

|    |             |             |             |
|----|-------------|-------------|-------------|
| H  | -1.95101300 | 2.17519700  | -0.19796300 |
| H  | 3.30248600  | -1.76262500 | -0.25190400 |
| N  | 1.41243700  | -1.94967800 | -1.13560800 |
| C  | 1.04742800  | -2.08614900 | 2.32678800  |
| H  | 1.70152000  | -1.21593400 | 2.27490000  |
| H  | 0.52637000  | -2.10823100 | 3.28598100  |
| H  | 1.63525800  | -2.99862300 | 2.20762700  |
| H  | -0.48084100 | -1.13569900 | 1.30392400  |
| C  | -0.86933100 | -3.14540300 | 1.16467700  |
| H  | -1.44889100 | -3.20209300 | 2.08748900  |
| H  | -1.54695900 | -2.99980500 | 0.32314000  |
| H  | 0.59340600  | -3.73972300 | -1.86098600 |
| N  | 0.06544900  | -2.00481800 | 1.22741300  |
| H  | 0.59835900  | -1.94091500 | 0.27931000  |
| O  | -1.60035700 | -0.52963200 | -1.05415700 |
| O  | -3.34506800 | 1.04123800  | -0.46811400 |
| Cl | -2.72746600 | -0.27160100 | -0.12257100 |
| O  | -3.71742900 | -1.34469100 | -0.18936500 |
| O  | -2.16112700 | -0.16097100 | 1.25612400  |

| (PA) <sub>2</sub> (DMA) <sub>4</sub> | x           | y           | z           |
|--------------------------------------|-------------|-------------|-------------|
| C                                    | -2.87995500 | 1.14325000  | -2.12707900 |
| H                                    | -3.95814000 | 1.24931000  | -1.99010300 |
| H                                    | -2.36486900 | 1.99724500  | -1.68868500 |
| H                                    | -2.65160000 | 1.07294200  | -3.19246000 |
| H                                    | -1.41651900 | -0.19660800 | -1.52357200 |
| C                                    | -3.10621500 | -1.31367100 | -1.91778100 |
| H                                    | -4.18045800 | -1.21455500 | -1.74846900 |
| H                                    | -2.91243000 | -1.44761400 | -2.98375400 |
| H                                    | -2.71393800 | -2.16808300 | -1.36600100 |
| N                                    | -2.43645100 | -0.08669300 | -1.44030000 |
| H                                    | -2.60486700 | 0.01958000  | -0.36187200 |
| O                                    | 1.26767500  | -3.15967600 | 0.02748300  |
| O                                    | -1.15727800 | -3.26412100 | -0.08479400 |
| Cl                                   | 0.02392800  | -2.38342400 | -0.12475300 |
| O                                    | -0.07156000 | -1.38280100 | 0.97138400  |
| O                                    | 0.05102800  | -1.65731700 | -1.42880400 |
| C                                    | -3.27429100 | -1.12755100 | 1.79941600  |
| H                                    | -4.29348100 | -1.29817700 | 1.43549600  |
| H                                    | -2.63993700 | -1.95367500 | 1.47264600  |
| H                                    | -3.30369500 | -1.11397000 | 2.89829700  |
| H                                    | -1.78754100 | 0.24378600  | 1.50520400  |

|    |             |             |             |
|----|-------------|-------------|-------------|
| C  | -3.52213900 | 1.29889900  | 1.68919000  |
| H  | -3.04815200 | 2.20171400  | 1.29966500  |
| H  | -4.54643800 | 1.23828500  | 1.30515400  |
| H  | -3.57286800 | 1.36785200  | 2.78517800  |
| N  | -2.76705200 | 0.12764400  | 1.24437300  |
| C  | 3.52042600  | -1.29751100 | -1.69089000 |
| H  | 2.36670300  | -1.99784000 | 1.68714400  |
| H  | 3.57017600  | -1.36563500 | -2.78697500 |
| H  | 4.54510200  | -1.23822900 | -1.30765400 |
| H  | 1.78713500  | -0.24043400 | -1.50482300 |
| C  | 3.27533600  | 1.12929800  | -1.79870500 |
| H  | 3.30428200  | 1.11661700  | -2.89760900 |
| H  | 2.64201600  | 1.95585300  | -1.47101200 |
| H  | 4.29485700  | 1.29851900  | -1.43505000 |
| N  | 2.76696500  | -0.12581900 | -1.24452000 |
| C  | 3.10506600  | 1.31357400  | 1.91918700  |
| H  | 4.17952600  | 1.21540500  | 1.75071700  |
| H  | 2.71256600  | 2.16799800  | 1.36758600  |
| H  | 2.91027100  | 1.44674200  | 2.98507200  |
| H  | 1.41661500  | 0.19511900  | 1.52334500  |
| C  | 2.88091700  | -1.14377400 | 2.12646100  |
| H  | 3.95925200  | -1.24885100 | 1.98990500  |
| H  | 2.65201300  | -1.07448600 | 3.19179100  |
| H  | 3.04591000  | -2.20017300 | -1.30168100 |
| N  | 2.43669200  | 0.08634100  | 1.44044600  |
| H  | 2.60549000  | -0.01896700 | 0.36200700  |
| O  | 1.15757600  | 3.26472300  | 0.08506800  |
| O  | -1.26742400 | 3.16065900  | -0.02712400 |
| Cl | -0.02375500 | 2.38414800  | 0.12441700  |
| O  | 0.07146800  | 1.38439500  | -0.97251700 |
| O  | -0.05079400 | 1.65705200  | 1.42791800  |

| (PA) <sub>3</sub> (DMA) <sub>1</sub> | x           | y           | z           |
|--------------------------------------|-------------|-------------|-------------|
| O                                    | -3.13349900 | -0.98983800 | -1.14068100 |
| O                                    | -4.92276500 | 0.54851000  | -0.72515200 |
| Cl                                   | -3.56352600 | 0.33200700  | -0.30450300 |
| H                                    | -2.15610700 | -1.12971400 | -0.94481000 |
| O                                    | -3.40250400 | 0.00880100  | 1.10261900  |
| O                                    | -2.63639000 | 1.38531100  | -0.72305500 |
| C                                    | 0.17738800  | 2.83172300  | -0.22468200 |
| H                                    | 0.72095700  | 3.60258300  | 0.32244400  |

|    |             |             |             |
|----|-------------|-------------|-------------|
| H  | 0.72910100  | 2.54894900  | -1.12048800 |
| H  | -0.81945800 | 3.18232200  | -0.48955600 |
| H  | -0.40934000 | 0.87343200  | 0.11062400  |
| C  | -0.70162900 | 1.86790700  | 1.90265800  |
| H  | -1.70412900 | 2.21376300  | 1.65523000  |
| H  | -0.75470000 | 0.92528500  | 2.44536100  |
| H  | -0.17055500 | 2.61809400  | 2.48941600  |
| N  | 0.04413500  | 1.63511400  | 0.64052200  |
| H  | 0.98071500  | 1.27337600  | 0.86597300  |
| O  | 4.79683500  | 0.98298200  | -0.64946600 |
| O  | 2.91679200  | 1.03447500  | 0.88150400  |
| Cl | 3.45994300  | 0.52493600  | -0.38210600 |
| O  | 2.50921700  | 0.70926900  | -1.46942400 |
| O  | 3.64797200  | -1.06337300 | -0.19545300 |
| O  | 1.37476500  | -2.31978900 | -0.37977300 |
| O  | -0.70546800 | -2.97935100 | 0.66286900  |
| Cl | 0.15849700  | -1.85852200 | 0.34788400  |
| H  | 2.73260900  | -1.50378500 | -0.22859300 |
| O  | 0.56754200  | -1.08607900 | 1.53206200  |
| O  | -0.57647200 | -0.90008200 | -0.57563000 |

| (PA) <sub>3</sub> (DMA) <sub>2</sub> | x           | y           | z           |
|--------------------------------------|-------------|-------------|-------------|
| C                                    | -0.74064300 | -2.24795500 | 2.67676900  |
| H                                    | -1.79398600 | -2.30058800 | 2.95294400  |
| H                                    | -0.53513000 | -2.93791600 | 1.85882100  |
| H                                    | -0.10894600 | -2.48390000 | 3.53382900  |
| H                                    | 0.54010500  | -0.85467800 | 1.88476500  |
| C                                    | -0.66185200 | 0.18303300  | 3.22081300  |
| H                                    | -0.02465900 | -0.01192600 | 4.08458400  |
| H                                    | -0.41774900 | 1.14579200  | 2.77496300  |
| H                                    | -1.71320700 | 0.17934300  | 3.50632900  |
| N                                    | -0.43815700 | -0.87594600 | 2.20960300  |
| H                                    | -1.03133400 | -0.69757500 | 1.37311100  |
| O                                    | -4.46364100 | -0.08138600 | -0.16585300 |
| O                                    | -2.87849900 | 1.12076200  | 1.22644000  |
| Cl                                   | -3.07832100 | 0.34171300  | -0.00380700 |
| O                                    | -2.18233200 | -0.87649300 | 0.06705000  |
| O                                    | -2.63037400 | 1.12508400  | -1.19326200 |
| C                                    | -1.31052000 | -1.50080100 | -2.93409700 |
| H                                    | -0.60499600 | -2.24307900 | -3.30877300 |
| H                                    | -1.95093100 | -1.93749000 | -2.16896700 |
| H                                    | -1.91626800 | -1.10465400 | -3.74968800 |

|    |             |             |             |
|----|-------------|-------------|-------------|
| H  | -1.23214300 | 0.28436000  | -1.90704200 |
| C  | 0.37421200  | 0.30189100  | -3.23937200 |
| H  | -0.19323500 | 0.67476600  | -4.09295800 |
| H  | 0.84130400  | 1.13429000  | -2.71593200 |
| H  | 1.13679100  | -0.40365100 | -3.56975800 |
| N  | -0.55237700 | -0.38801500 | -2.31442000 |
| H  | -0.02556700 | -0.77495400 | -1.51602000 |
| O  | 3.08397000  | -2.89377700 | -0.33869800 |
| O  | 0.81414400  | -2.04803800 | -0.45213700 |
| Cl | 2.22812500  | -1.75030700 | -0.08559100 |
| O  | 2.26065600  | -1.34487000 | 1.34252300  |
| O  | 2.67753600  | -0.57656300 | -0.91763100 |
| O  | 2.70286700  | 1.69744900  | 0.37322400  |
| O  | 1.16952700  | 2.91875400  | -1.12362700 |
| Cl | 1.19588300  | 2.25818900  | 0.16736400  |
| H  | 2.75351200  | 0.81261300  | -0.11988700 |
| O  | 0.33604400  | 1.07591100  | 0.19781100  |
| O  | 1.01593300  | 3.13944000  | 1.29404700  |

| (PA) <sub>3</sub> (DMA) <sub>3</sub> | x           | y           | z           |
|--------------------------------------|-------------|-------------|-------------|
| C                                    | -1.53266500 | 2.49664400  | 1.80774000  |
| H                                    | -0.82526400 | 3.12944700  | 2.34517300  |
| H                                    | -1.57635000 | 2.78107600  | 0.75782500  |
| H                                    | -2.53019800 | 2.56900400  | 2.23978900  |
| H                                    | -1.71345000 | 0.48097100  | 1.33711800  |
| C                                    | -1.02146700 | 0.55082600  | 3.27177500  |
| H                                    | -2.02410800 | 0.58169900  | 3.69920900  |
| H                                    | -0.66509300 | -0.47693100 | 3.22104300  |
| H                                    | -0.33921000 | 1.15927000  | 3.86712300  |
| N                                    | -1.07661300 | 1.08912500  | 1.89450900  |
| H                                    | -0.14807100 | 1.00865900  | 1.45633900  |
| O                                    | 1.91147200  | -1.82839100 | -0.55337000 |
| O                                    | 1.45064000  | -3.37286400 | 1.26537800  |
| Cl                                   | 1.51751600  | -1.96859500 | 0.87601300  |
| O                                    | 2.52285800  | -1.24535000 | 1.71135400  |
| O                                    | 0.19075300  | -1.31920200 | 1.04568800  |
| C                                    | -1.38025800 | -2.76965400 | -1.31505600 |
| H                                    | -0.46110700 | -3.35022300 | -1.22968400 |
| H                                    | -1.92165400 | -2.77504700 | -0.37033600 |
| H                                    | -2.00933900 | -3.16281500 | -2.11450300 |
| H                                    | -1.90786100 | -0.80814500 | -1.66162700 |
| C                                    | -0.27672200 | -1.19509700 | -2.89399600 |
| H                                    | -0.88673600 | -1.56567600 | -3.71885400 |

|    |             |             |             |
|----|-------------|-------------|-------------|
| H  | -0.05879800 | -0.13661500 | -3.02472800 |
| H  | 0.65280200  | -1.75893700 | -2.81932900 |
| N  | -1.03135700 | -1.36473400 | -1.63270100 |
| H  | -0.48885700 | -0.98178100 | -0.84807900 |
| O  | -5.17465600 | -0.75331800 | 0.13512300  |
| O  | -2.80573800 | -0.68575500 | 0.66018200  |
| Cl | -3.92982600 | -0.03696100 | -0.11573200 |
| O  | -3.55643700 | -0.13309200 | -1.55895300 |
| O  | -4.01224400 | 1.37228600  | 0.29551700  |
| C  | 4.88988400  | -0.67205000 | -0.76764000 |
| H  | 5.62033400  | -1.01750500 | -0.03497700 |
| H  | 4.29127400  | -1.51136000 | -1.11941300 |
| H  | 5.39814500  | -0.18670200 | -1.60193000 |
| H  | 3.25886000  | 0.61218100  | -0.79954900 |
| C  | 4.65168800  | 1.49412300  | 0.43830400  |
| H  | 5.16861200  | 2.02180000  | -0.36419000 |
| H  | 3.88824200  | 2.13697700  | 0.87490400  |
| H  | 5.36612800  | 1.17829100  | 1.19970100  |
| N  | 3.98052800  | 0.30009800  | -0.12179000 |
| H  | 3.44417800  | -0.18495400 | 0.62431400  |
| O  | 0.91040800  | 3.46613700  | -1.03928900 |
| O  | 1.45165900  | 1.71684800  | 0.55374700  |
| Cl | 1.00449000  | 2.02381200  | -0.84388700 |
| O  | -0.30429800 | 1.37095400  | -1.05814800 |
| O  | 2.01071900  | 1.43612600  | -1.77919000 |

| (PA) <sub>3</sub> (DMA) <sub>4</sub> | x           | y           | z           |
|--------------------------------------|-------------|-------------|-------------|
| C                                    | -5.06835400 | 0.40782000  | -1.10531700 |
| H                                    | -5.62248200 | 1.33943500  | -1.22796700 |
| H                                    | -4.42967700 | 0.22123500  | -1.96707900 |
| H                                    | -5.76260000 | -0.42329000 | -0.97353100 |
| H                                    | -3.61849000 | -0.34056200 | 0.17994400  |
| C                                    | -4.95168200 | 0.73136100  | 1.35669700  |
| H                                    | -5.61827400 | -0.11487700 | 1.52846600  |
| H                                    | -4.22769600 | 0.82075200  | 2.16514400  |
| H                                    | -5.53207200 | 1.65110600  | 1.27211500  |
| N                                    | -4.20854400 | 0.51207700  | 0.09524800  |
| H                                    | -3.51083000 | 1.27293200  | -0.02708100 |
| O                                    | -2.34044600 | -3.05808700 | -1.76862500 |
| O                                    | -0.37060800 | -1.85892800 | -1.02180300 |
| Cl                                   | -1.84483800 | -1.82617600 | -1.16463200 |
| O                                    | -2.23636400 | -0.64092100 | -1.96369300 |

|    |             |             |             |
|----|-------------|-------------|-------------|
| O  | -2.43282500 | -1.66485500 | 0.21545900  |
| C  | 0.07071400  | -2.81206600 | 2.08651600  |
| H  | -0.60422200 | -3.02059200 | 2.91774900  |
| H  | -0.30978600 | -3.25693800 | 1.16923900  |
| H  | 1.07247600  | -3.18779800 | 2.29658900  |
| H  | 0.81773300  | -1.16969400 | 1.09994700  |
| C  | 0.67121900  | -0.61995400 | 3.08268400  |
| H  | 1.63228800  | -1.05189200 | 3.36206200  |
| H  | 0.80400000  | 0.42772400  | 2.82016600  |
| H  | -0.05220700 | -0.71643300 | 3.89270100  |
| N  | 0.16528500  | -1.34658600 | 1.89255500  |
| H  | 4.84128700  | 2.70193100  | -0.86810200 |
| O  | 3.67251500  | 0.25485000  | 1.47555100  |
| O  | 4.59848300  | -1.31573000 | -0.12738100 |
| Cl | 3.50791400  | -1.06230800 | 0.81981900  |
| O  | 3.41024900  | -2.12369100 | 1.83922700  |
| O  | 2.20956800  | -1.03529800 | 0.05197400  |
| C  | 2.27000600  | 3.48989500  | -0.65378300 |
| H  | 0.67909000  | 2.03926500  | -3.44290000 |
| H  | 1.31723700  | 3.47880900  | -0.12134600 |
| H  | 2.96249700  | 4.16088900  | -0.12502300 |
| H  | 2.84877200  | 1.71501900  | 0.17456000  |
| C  | 4.10812300  | 2.05891000  | -1.37527300 |
| H  | 4.03880100  | 2.37974300  | -2.42113800 |
| H  | -0.74456800 | -0.96368500 | 1.60884500  |
| H  | 4.47310500  | 1.02964200  | -1.34265700 |
| N  | 2.78449100  | 2.12632200  | -0.75627000 |
| C  | 1.86759500  | -0.38341000 | -2.98231300 |
| H  | 2.52940800  | -0.98517900 | -2.36013700 |
| H  | 1.20732600  | -1.03254100 | -3.55995000 |
| H  | 2.45166000  | 0.24924800  | -3.65377300 |
| H  | 0.54823800  | -0.12357300 | -1.44066400 |
| C  | 0.11258200  | 1.35839200  | -2.80377600 |
| H  | -0.57139000 | 0.75629300  | -3.40298100 |
| H  | -0.45483800 | 1.92198100  | -2.06326100 |
| H  | 2.10644800  | 3.89625600  | -1.65820700 |
| N  | 1.06062200  | 0.47783400  | -2.09494300 |
| H  | 1.72656400  | 1.09824300  | -1.50378600 |
| O  | -0.02284100 | 1.26159100  | 0.42031900  |
| O  | -1.87376500 | 0.93573100  | 1.92394500  |
| Cl | -1.17079900 | 1.93404500  | 1.06825000  |
| O  | -0.71906300 | 3.07423300  | 1.86087800  |
| O  | -2.12879000 | 2.39198000  | 0.01175100  |

| (PA) <sub>4</sub> (DMA) <sub>1</sub> | x           | y           | z           |
|--------------------------------------|-------------|-------------|-------------|
| O                                    | 3.43659500  | -1.94741500 | 0.83039300  |
| O                                    | 0.81676900  | -1.88292900 | 1.14432400  |
| Cl                                   | 0.05569400  | -0.85311500 | 1.92560600  |
| H                                    | 2.47298300  | -1.91713600 | 1.10698400  |
| O                                    | -0.62945900 | -1.45776200 | 3.04840500  |
| O                                    | -0.92064600 | -0.25470700 | 0.95996400  |
| O                                    | -3.39407400 | 0.76625900  | 1.02493400  |
| O                                    | -3.91660900 | -1.30270500 | -0.22762700 |
| Cl                                   | -3.80659800 | 0.13318100  | -0.41823100 |
| H                                    | -2.46719000 | 0.45372700  | 1.20913900  |
| O                                    | -5.04874100 | 0.80033700  | -0.70397100 |
| O                                    | -2.71896100 | 0.47859300  | -1.33227800 |
| C                                    | -0.95280700 | -2.35574100 | -1.59029600 |
| H                                    | -0.51194300 | -3.09014500 | -2.26494800 |
| H                                    | -0.86563100 | -2.69163800 | -0.55870800 |
| H                                    | -1.99875100 | -2.18244400 | -1.83970100 |
| H                                    | -0.59274300 | -0.39089300 | -1.06689900 |
| C                                    | -0.23494700 | -0.51602600 | -3.10515300 |
| H                                    | -1.27004600 | -0.31200200 | -3.37713000 |
| H                                    | 0.34023700  | 0.40800500  | -3.11440800 |
| H                                    | 0.20474700  | -1.24434000 | -3.78701900 |
| N                                    | -0.21106500 | -1.07732200 | -1.73182200 |
| H                                    | 0.76650000  | -1.22841400 | -1.44974400 |
| O                                    | 4.91148000  | -1.22652900 | -0.91489500 |
| O                                    | 2.61068000  | -1.75722500 | -1.48505900 |
| Cl                                   | 3.52813600  | -1.09255900 | -0.54895300 |
| O                                    | 0.99599900  | 0.20342400  | 2.36228100  |
| O                                    | 3.09001700  | 0.25275800  | -0.23802900 |
| O                                    | 1.40097400  | 2.52491800  | 1.00610500  |
| O                                    | 0.61454500  | 4.05866700  | -0.65137200 |
| Cl                                   | 0.23461000  | 2.78250600  | -0.10402700 |
| H                                    | 1.21333500  | 1.65370200  | 1.45149300  |
| O                                    | 0.34951300  | 1.68324700  | -1.05787200 |
| O                                    | -1.02609500 | 2.77294300  | 0.60962700  |

| (PA) <sub>4</sub> (DMA) <sub>2</sub> | x          | y           | z          |
|--------------------------------------|------------|-------------|------------|
| C                                    | 0.63921200 | -0.26392500 | 3.15973100 |

|    |             |             |             |
|----|-------------|-------------|-------------|
| H  | 0.43890300  | -0.69317800 | 4.14213300  |
| H  | 1.05536800  | -1.01649500 | 2.49158700  |
| H  | 1.32228800  | 0.58170100  | 3.24528800  |
| H  | -0.41202100 | 0.58206100  | 1.62789700  |
| C  | -1.30254000 | 1.28039000  | 3.37116500  |
| H  | -0.64225200 | 2.14573400  | 3.42026600  |
| H  | -2.23273400 | 1.55390800  | 2.87571100  |
| H  | -1.50542400 | 0.89323500  | 4.37045400  |
| N  | -0.63347500 | 0.22455200  | 2.57440300  |
| H  | -1.27975200 | -0.56451500 | 2.41869900  |
| O  | 0.19229600  | 3.15393200  | -0.77737100 |
| O  | 0.57763200  | 0.95175000  | 0.16739600  |
| Cl | 1.00844900  | 2.39289800  | 0.15748400  |
| O  | 2.43626000  | 2.41262200  | -0.30606100 |
| O  | 0.91529000  | 2.89967900  | 1.53200800  |
| O  | -4.08633200 | -0.23102200 | -0.73702700 |
| O  | -4.10768600 | 2.13784600  | -1.12035400 |
| Cl | -3.15642500 | 1.09938500  | -0.82466200 |
| H  | -3.44118600 | -1.00098400 | -0.64935000 |
| O  | -2.51792600 | 1.23044300  | 0.47573900  |
| O  | -2.19783700 | 0.84055200  | -1.89062600 |
| C  | 0.80958600  | -2.21262600 | -2.39471400 |
| H  | 1.86711500  | -2.14290300 | -2.64866100 |
| H  | 0.66594500  | -2.92174500 | -1.58138900 |
| H  | 0.22715800  | -2.50813700 | -3.26753200 |
| H  | -0.65141200 | -0.92856000 | -1.70192000 |
| C  | 0.59095900  | 0.21324100  | -2.91758400 |
| H  | 0.07501800  | -0.02734300 | -3.84744800 |
| H  | 0.20306800  | 1.14300600  | -2.50518600 |
| H  | 1.66538400  | 0.29114600  | -3.08216900 |
| N  | 0.34831800  | -0.87833400 | -1.94104500 |
| H  | 0.80831700  | -0.63831100 | -1.05280500 |
| O  | 4.96607800  | -1.56068500 | 0.05475500  |
| O  | 3.74071400  | -0.39430900 | -1.70322400 |
| Cl | 3.81267900  | -0.77179700 | -0.29641300 |
| O  | 2.54986200  | -1.33930200 | 0.16633600  |
| O  | 4.04068500  | 0.59056700  | 0.53758100  |
| O  | -0.19309700 | -2.11530400 | 0.67304700  |
| O  | -1.73162600 | -3.99258700 | 0.58842800  |
| Cl | -1.60544500 | -2.54624600 | 0.59001400  |
| H  | 3.37006600  | 1.28974900  | 0.21001900  |
| O  | -2.36760700 | -1.92963300 | 1.70376600  |
| O  | -2.15303200 | -1.99185800 | -0.71321300 |

| (PA) <sub>4</sub> (DMA) <sub>3</sub> | x           | y           | z           |
|--------------------------------------|-------------|-------------|-------------|
| C                                    | 3.35970900  | 2.69828100  | -0.03086200 |
| H                                    | 4.39575100  | 2.37319400  | 0.05395800  |
| H                                    | 3.03770200  | 2.62071800  | -1.06713100 |
| H                                    | -3.10983400 | 3.46239000  | -1.97766200 |
| H                                    | 1.52922100  | 2.03380500  | 0.65915900  |
| C                                    | 2.87392800  | 1.78418300  | 2.22625000  |
| H                                    | 2.69450800  | 2.77314600  | 2.64840000  |
| H                                    | 2.26318600  | 1.04030700  | 2.73472500  |
| H                                    | 3.92577700  | 1.51144300  | 2.31485200  |
| N                                    | 2.51982100  | 1.79175300  | 0.78791500  |
| H                                    | 2.61870900  | 0.81299100  | 0.44921300  |
| O                                    | 4.96758400  | -2.11738400 | 0.89447000  |
| O                                    | 3.95281800  | -2.05474900 | -1.30851500 |
| Cl                                   | 4.23278600  | -1.30540000 | -0.07150200 |
| O                                    | 2.88029100  | -0.93538700 | 0.53481600  |
| O                                    | 4.93006500  | -0.03728200 | -0.35360900 |
| C                                    | 0.48533700  | -3.05260300 | 0.07550000  |
| H                                    | 1.36968300  | -3.69032200 | 0.08151300  |
| H                                    | 0.33269800  | -2.62525000 | 1.06528900  |
| H                                    | -0.39434000 | -3.61422200 | -0.23788800 |
| H                                    | -0.05444600 | -1.26885300 | -0.85153500 |
| C                                    | 0.92952500  | -2.38418400 | -2.27642000 |
| H                                    | 0.02549000  | -2.88554600 | -2.62387500 |
| H                                    | 1.13827700  | -1.50556100 | -2.88411300 |
| H                                    | 1.78724200  | -3.05529500 | -2.30237400 |
| N                                    | 0.72091800  | -1.94359100 | -0.87734600 |
| H                                    | 1.55735700  | -1.42772500 | -0.53986900 |
| O                                    | -0.00087700 | 2.04760200  | -3.28416600 |
| O                                    | 1.54808800  | 0.80612500  | -1.88095600 |
| Cl                                   | 0.22360300  | 1.44454100  | -1.97399200 |
| O                                    | 0.13789200  | 2.50965200  | -0.90864500 |
| O                                    | -0.83436100 | 0.43805700  | -1.67870900 |
| C                                    | -3.29607300 | 2.48457800  | -1.53247700 |
| H                                    | 3.23675300  | 3.71882900  | 0.33435200  |
| H                                    | -2.89761000 | 1.69804600  | -2.17088300 |
| H                                    | -4.36403400 | 2.33467400  | -1.37347800 |
| H                                    | -2.68429500 | 1.47373100  | 0.17506200  |
| C                                    | -3.08459700 | 3.40210900  | 0.77386200  |
| H                                    | -4.13937900 | 3.21284900  | 0.97514500  |
| H                                    | -2.49862900 | 3.28333700  | 1.68387900  |
| H                                    | -2.95531000 | 4.40610000  | 0.36806900  |

|    |             |             |             |
|----|-------------|-------------|-------------|
| N  | -2.60158000 | 2.41885500  | -0.22348800 |
| H  | -1.58096400 | 2.54451100  | -0.37419400 |
| O  | -0.51002500 | 0.22213000  | 3.62117600  |
| O  | -0.38456900 | 2.10621900  | 2.09127700  |
| Cl | -0.67477700 | 0.66679900  | 2.24461700  |
| O  | 0.17071400  | -0.11089200 | 1.32259700  |
| O  | -2.12838100 | 0.47283500  | 1.83044000  |
| O  | -3.19468200 | -1.81192600 | 1.37196000  |
| O  | -3.97584300 | -0.31267400 | -0.41334100 |
| Cl | -3.54878000 | -1.69349000 | -0.20317700 |
| H  | -2.70373700 | -0.95501300 | 1.62570300  |
| O  | -2.32781200 | -2.01021600 | -0.92513300 |
| O  | -4.59766800 | -2.66495000 | -0.38158400 |

| (PA) <sub>4</sub> (DMA) <sub>4</sub> | x           | y           | z           |
|--------------------------------------|-------------|-------------|-------------|
| C                                    | 1.24478000  | -2.85396300 | 2.49600400  |
| H                                    | 1.97414800  | -2.34889200 | 3.12887100  |
| H                                    | 0.23332300  | -2.65724100 | 2.84898700  |
| H                                    | 1.43200200  | -3.92845800 | 2.47821300  |
| H                                    | 0.64577400  | -2.71089000 | 0.51029200  |
| C                                    | 2.69082300  | -2.63465400 | 0.48836700  |
| H                                    | 2.77217500  | -3.71499100 | 0.36843600  |
| H                                    | 2.72857200  | -2.15824800 | -0.49045000 |
| H                                    | 3.48655900  | -2.24792300 | 1.12350500  |
| N                                    | 1.38291200  | -2.32565700 | 1.11777900  |
| H                                    | 1.23469600  | -1.30288200 | 1.12493400  |
| O                                    | -0.89689200 | -2.77439200 | -3.14981100 |
| O                                    | 1.51834600  | -2.76844200 | -2.87067300 |
| Cl                                   | 0.21773800  | -2.62107000 | -2.20598300 |
| O                                    | 0.14222900  | -1.25236600 | -1.58125400 |
| O                                    | 0.08719800  | -3.61015500 | -1.10008300 |
| C                                    | -3.02536700 | -2.47315600 | -0.65971300 |
| H                                    | -2.78011300 | -3.11160700 | -1.50743900 |
| H                                    | -2.42925600 | -2.75934400 | 0.20453800  |
| H                                    | -4.08610500 | -2.53709700 | -0.41641200 |
| H                                    | -2.96158700 | -0.46794000 | -0.22343800 |
| C                                    | -3.37766700 | -0.61950900 | -2.26464300 |
| H                                    | -4.45031200 | -0.79214700 | -2.16593000 |
| H                                    | -3.18628600 | 0.44199900  | -2.41194100 |
| H                                    | -2.97337800 | -1.20179100 | -3.09263800 |
| N                                    | -2.70774900 | -1.06725800 | -1.01950500 |
| H                                    | -1.68366300 | -0.95601900 | -1.12165500 |
| O                                    | -0.87573400 | 3.80544900  | -1.01584000 |

|    |             |             |             |
|----|-------------|-------------|-------------|
| O  | -2.80413300 | 2.67904700  | -1.96467400 |
| Cl | -1.36845000 | 2.58424600  | -1.68529900 |
| O  | -0.60389400 | 2.33405600  | -2.93000800 |
| O  | -1.11444000 | 1.41820400  | -0.76520200 |
| C  | -2.23726900 | 2.91645400  | 1.89310300  |
| H  | -2.33683300 | 3.67787800  | 1.11960600  |
| H  | -2.91405300 | 2.08445700  | 1.70189100  |
| H  | -2.43915400 | 3.33786000  | 2.87834400  |
| H  | -0.77101700 | 1.64469500  | 2.56125900  |
| C  | 0.17720700  | 3.45370900  | 2.11525600  |
| H  | -0.00714100 | 3.90033700  | 3.09333400  |
| H  | 1.16820600  | 3.00242300  | 2.08880800  |
| H  | 0.08188600  | 4.20657900  | 1.33269600  |
| N  | -0.84218700 | 2.40631600  | 1.87107600  |
| H  | -0.68249400 | 1.96042500  | 0.95089500  |
| O  | -2.21096500 | -2.13587800 | 2.96523800  |
| O  | -3.30001500 | -0.32597600 | 1.76067900  |
| Cl | -2.03851200 | -0.79570200 | 2.39794800  |
| O  | -1.62771000 | 0.16779300  | 3.44861600  |
| O  | -0.98924200 | -0.82087500 | 1.33985900  |
| C  | 2.28022100  | 2.53540700  | -1.61307800 |
| H  | 2.37337800  | 3.05987500  | -2.56408100 |
| H  | 1.54041900  | 3.04001000  | -0.99304800 |
| H  | 3.23922200  | 2.48745100  | -1.09791000 |
| H  | 1.64238900  | 0.68994200  | -0.96961600 |
| C  | 2.77525600  | 0.35119000  | -2.68095500 |
| H  | 3.70977000  | 0.28253100  | -2.12459200 |
| H  | 2.35719200  | -0.64069400 | -2.84804000 |
| H  | 2.93554600  | 0.85753200  | -3.63377100 |
| N  | 1.81821000  | 1.14952500  | -1.87776800 |
| H  | 0.90569900  | 1.19837400  | -2.35122400 |
| O  | 3.26303800  | -0.18057700 | 2.56904100  |
| O  | 1.64716200  | 0.57576900  | 0.94184000  |
| Cl | 3.06067900  | 0.76900600  | 1.46529200  |
| O  | 3.20316500  | 2.15886500  | 1.91531100  |
| O  | 3.98598500  | 0.48236500  | 0.34995000  |

| (PA) <sub>4</sub> (DMA) <sub>4</sub> | x          | y           | z          |
|--------------------------------------|------------|-------------|------------|
| C                                    | 1.24478000 | -2.85396300 | 2.49600400 |
| H                                    | 1.97414800 | -2.34889200 | 3.12887100 |
| H                                    | 0.23332300 | -2.65724100 | 2.84898700 |
| H                                    | 1.43200200 | -3.92845800 | 2.47821300 |

|    |             |             |             |
|----|-------------|-------------|-------------|
| H  | 0.64577400  | -2.71089000 | 0.51029200  |
| C  | 2.69082300  | -2.63465400 | 0.48836700  |
| H  | 2.77217500  | -3.71499100 | 0.36843600  |
| H  | 2.72857200  | -2.15824800 | -0.49045000 |
| H  | 3.48655900  | -2.24792300 | 1.12350500  |
| N  | 1.38291200  | -2.32565700 | 1.11777900  |
| H  | 1.23469600  | -1.30288200 | 1.12493400  |
| O  | -0.89689200 | -2.77439200 | -3.14981100 |
| O  | 1.51834600  | -2.76844200 | -2.87067300 |
| Cl | 0.21773800  | -2.62107000 | -2.20598300 |
| O  | 0.14222900  | -1.25236600 | -1.58125400 |
| O  | 0.08719800  | -3.61015500 | -1.10008300 |
| C  | -3.02536700 | -2.47315600 | -0.65971300 |
| H  | -2.78011300 | -3.11160700 | -1.50743900 |
| H  | -2.42925600 | -2.75934400 | 0.20453800  |
| H  | -4.08610500 | -2.53709700 | -0.41641200 |
| H  | -2.96158700 | -0.46794000 | -0.22343800 |
| C  | -3.37766700 | -0.61950900 | -2.26464300 |
| H  | -4.45031200 | -0.79214700 | -2.16593000 |
| H  | -3.18628600 | 0.44199900  | -2.41194100 |
| H  | -2.97337800 | -1.20179100 | -3.09263800 |
| N  | -2.70774900 | -1.06725800 | -1.01950500 |
| H  | -1.68366300 | -0.95601900 | -1.12165500 |
| O  | -0.87573400 | 3.80544900  | -1.01584000 |
| O  | -2.80413300 | 2.67904700  | -1.96467400 |
| Cl | -1.36845000 | 2.58424600  | -1.68529900 |
| O  | -0.60389400 | 2.33405600  | -2.93000800 |
| O  | -1.11444000 | 1.41820400  | -0.76520200 |
| C  | -2.23726900 | 2.91645400  | 1.89310300  |
| H  | -2.33683300 | 3.67787800  | 1.11960600  |
| H  | -2.91405300 | 2.08445700  | 1.70189100  |
| H  | -2.43915400 | 3.33786000  | 2.87834400  |
| H  | -0.77101700 | 1.64469500  | 2.56125900  |
| C  | 0.17720700  | 3.45370900  | 2.11525600  |
| H  | -0.00714100 | 3.90033700  | 3.09333400  |
| H  | 1.16820600  | 3.00242300  | 2.08880800  |
| H  | 0.08188600  | 4.20657900  | 1.33269600  |
| N  | -0.84218700 | 2.40631600  | 1.87107600  |
| H  | -0.68249400 | 1.96042500  | 0.95089500  |
| O  | -2.21096500 | -2.13587800 | 2.96523800  |
| O  | -3.30001500 | -0.32597600 | 1.76067900  |
| Cl | -2.03851200 | -0.79570200 | 2.39794800  |
| O  | -1.62771000 | 0.16779300  | 3.44861600  |
| O  | -0.98924200 | -0.82087500 | 1.33985900  |

|    |            |             |             |
|----|------------|-------------|-------------|
| C  | 2.28022100 | 2.53540700  | -1.61307800 |
| H  | 2.37337800 | 3.05987500  | -2.56408100 |
| H  | 1.54041900 | 3.04001000  | -0.99304800 |
| H  | 3.23922200 | 2.48745100  | -1.09791000 |
| H  | 1.64238900 | 0.68994200  | -0.96961600 |
| C  | 2.77525600 | 0.35119000  | -2.68095500 |
| H  | 3.70977000 | 0.28253100  | -2.12459200 |
| H  | 2.35719200 | -0.64069400 | -2.84804000 |
| H  | 2.93554600 | 0.85753200  | -3.63377100 |
| N  | 1.81821000 | 1.14952500  | -1.87776800 |
| H  | 0.90569900 | 1.19837400  | -2.35122400 |
| O  | 3.26303800 | -0.18057700 | 2.56904100  |
| O  | 1.64716200 | 0.57576900  | 0.94184000  |
| Cl | 3.06067900 | 0.76900600  | 1.46529200  |
| O  | 3.20316500 | 2.15886500  | 1.91531100  |
| O  | 3.98598500 | 0.48236500  | 0.34995000  |

| (PA) <sub>i</sub> (SA) <sub>i</sub> | x           | y           | z           |
|-------------------------------------|-------------|-------------|-------------|
| O                                   | -1.47196000 | 1.35544100  | -0.43719200 |
| O                                   | -3.37380900 | 0.26732000  | 0.53876800  |
| Cl                                  | -2.07934000 | -0.08357400 | 0.02299300  |
| H                                   | -0.51646100 | 1.18689600  | -0.67723500 |
| O                                   | -2.08060900 | -0.93442400 | -1.14618900 |
| O                                   | -1.15831600 | -0.57405000 | 1.06255200  |
| S                                   | 2.05077700  | 0.00217200  | -0.13756600 |
| O                                   | 2.20472300  | 0.95146500  | 1.14355800  |
| O                                   | 1.05034200  | 0.67265000  | -0.94882400 |
| O                                   | 3.34049400  | -0.33155600 | -0.66232100 |
| O                                   | 1.43614800  | -1.32070500 | 0.46686000  |
| H                                   | 2.98837700  | 0.69228600  | 1.65185900  |
| H                                   | 0.48832400  | -1.18229700 | 0.69785600  |

| (PA) <sub>i</sub> (SA) <sub>3</sub> | x           | y           | z           |
|-------------------------------------|-------------|-------------|-------------|
| S                                   | 3.54771300  | 0.52176700  | -0.35507400 |
| O                                   | 3.28342900  | 2.07589900  | -0.21937500 |
| O                                   | 4.88529300  | 0.36190400  | -0.82454400 |
| O                                   | 3.10043000  | -0.10387500 | 0.89551800  |
| O                                   | 2.54276100  | 0.07139200  | -1.49165700 |
| H                                   | 2.39440900  | 2.23327700  | 0.15428700  |
| H                                   | 1.73394800  | -0.33569000 | -1.10586700 |
| O                                   | -1.87262200 | 2.33338400  | 0.25002000  |

|    |             |             |             |
|----|-------------|-------------|-------------|
| O  | 0.52602400  | 1.85782200  | 0.50193700  |
| Cl | -0.45985700 | 2.35449700  | -0.50015100 |
| H  | -2.18004600 | 1.35375000  | 0.30035200  |
| O  | -0.55135300 | 1.45610700  | -1.62939400 |
| O  | -0.23935000 | 3.73883000  | -0.80714000 |
| S  | -3.09151100 | -1.11249500 | -0.42599000 |
| O  | -2.06500100 | -1.42369700 | -1.58458400 |
| O  | -2.45161000 | -0.12076300 | 0.46041700  |
| O  | -4.36781500 | -0.85364300 | -1.00666200 |
| O  | -3.18007000 | -2.44764600 | 0.39860800  |
| H  | -1.14125100 | -1.31817700 | -1.26220400 |
| H  | -2.34434100 | -2.60379800 | 0.89677200  |
| S  | 0.36844400  | -1.66719800 | 1.11621900  |
| O  | 0.20437800  | -0.42035900 | 2.05746600  |
| O  | -0.62566900 | -2.65345200 | 1.46039900  |
| O  | 0.39038900  | -1.18609400 | -0.27640300 |
| O  | 1.75559000  | -2.25837600 | 1.49518400  |
| H  | 0.30364300  | 0.41659500  | 1.54949000  |
| H  | 2.45930000  | -1.57360900 | 1.31103900  |

| (PA) <sub>1</sub> (SA) <sub>4</sub> | x           | y           | z           |
|-------------------------------------|-------------|-------------|-------------|
| S                                   | 4.30541100  | -0.89840200 | -0.21390300 |
| O                                   | 4.72387600  | 0.36646700  | 0.37983700  |
| O                                   | 5.27200900  | -1.90810700 | -0.51732700 |
| O                                   | 1.67709900  | 1.21808800  | -0.61366600 |
| O                                   | 3.48362600  | -0.62443700 | -1.53560000 |
| H                                   | 3.83089800  | 1.64258200  | 0.81583000  |
| H                                   | 2.79864300  | 0.06282200  | -1.36257300 |
| S                                   | 1.74428000  | 1.97694200  | 0.63233200  |
| O                                   | 3.18951800  | -1.42018400 | 0.79423300  |
| O                                   | 3.19354200  | 2.40462700  | 0.97362400  |
| O                                   | 0.93584100  | 3.18363000  | 0.70074900  |
| O                                   | 1.38146400  | 1.01885600  | 1.82209300  |
| H                                   | 2.72136100  | -2.20902200 | 0.44834600  |
| H                                   | 0.92736700  | 0.20277100  | 1.49827400  |
| O                                   | -1.29351500 | -2.79286200 | -0.22657500 |
| O                                   | 0.11249100  | -1.14947000 | -1.32421800 |
| Cl                                  | 0.00805000  | -2.03423200 | -0.14480900 |
| H                                   | -2.41641600 | -1.98450600 | -0.46227400 |
| O                                   | -0.00919800 | -1.23868900 | 1.10003200  |
| O                                   | 1.09713000  | -3.00864800 | -0.13741000 |
| S                                   | -4.17485000 | -0.98474800 | 0.46772100  |
| O                                   | -3.28248500 | -0.46854200 | 1.62759400  |

|   |             |             |             |
|---|-------------|-------------|-------------|
| O | -3.22441400 | -1.32799100 | -0.68327300 |
| O | -5.05004100 | -2.00052000 | 0.93493200  |
| O | -4.96273900 | 0.21422100  | -0.10084400 |
| H | -2.56030900 | 0.15026100  | 1.30241800  |
| H | -4.37366200 | 0.91106500  | -0.52810900 |
| S | -1.87239700 | 1.86821100  | -0.72006900 |
| O | -1.11271500 | 1.20242600  | -1.91096500 |
| O | -3.27982300 | 1.98286300  | -1.06615100 |
| O | -1.54320400 | 1.13367200  | 0.50626200  |
| O | -1.31064200 | 3.30711600  | -0.64909400 |
| H | -0.59891700 | 0.40538200  | -1.61764200 |
| H | -0.42732000 | 3.32469300  | -0.16550800 |

| (PA) <sub>2</sub> (SA) <sub>1</sub> | x           | y           | z           |
|-------------------------------------|-------------|-------------|-------------|
| O                                   | 3.84216500  | 1.06455500  | -0.27766100 |
| O                                   | 3.10287800  | -1.11302000 | -1.18450000 |
| Cl                                  | 3.73890000  | -0.54348800 | -0.01695200 |
| H                                   | 2.90372200  | 1.38617800  | -0.34876800 |
| O                                   | 5.10794500  | -0.91786900 | 0.19673500  |
| O                                   | 2.90476200  | -0.68440400 | 1.18700500  |
| S                                   | -0.00041400 | 0.96070200  | 0.00649500  |
| O                                   | -0.22677400 | 0.00978000  | -1.22475400 |
| O                                   | 1.21391000  | 1.69555000  | -0.27945400 |
| O                                   | -1.21515900 | 1.69060000  | 0.30308200  |
| O                                   | 0.22630600  | -0.00785000 | 1.22379800  |
| H                                   | -1.14856400 | -0.34100700 | -1.23246700 |
| H                                   | 1.14802100  | -0.35893900 | 1.22618800  |
| O                                   | -3.84334500 | 1.05955300  | 0.29288900  |
| O                                   | -3.10346100 | -1.13103800 | 1.16737200  |
| Cl                                  | -3.73958800 | -0.54448300 | 0.00836600  |
| H                                   | -2.90501200 | 1.38033600  | 0.36882300  |
| O                                   | -5.10852700 | -0.91601700 | -0.21092200 |
| O                                   | -2.90538600 | -0.66734100 | -1.19750300 |

| (PA) <sub>2</sub> (SA) <sub>2</sub> | x           | y           | z           |
|-------------------------------------|-------------|-------------|-------------|
| O                                   | -3.88368800 | 1.48169100  | -0.62453600 |
| O                                   | -4.80561300 | -0.73073300 | -0.74706900 |
| Cl                                  | -3.66937000 | -0.06536800 | -0.17069400 |
| H                                   | -3.05371800 | 1.96150000  | -0.35078700 |
| O                                   | -2.38471500 | -0.44011100 | -0.78514900 |
| O                                   | -3.60394000 | -0.07932000 | 1.27316300  |
| S                                   | -0.26313900 | 2.11097200  | 0.37558700  |

|    |             |             |             |
|----|-------------|-------------|-------------|
| O  | 0.28269900  | 1.73480400  | -1.03904000 |
| O  | -1.59624600 | 2.64008600  | 0.15075500  |
| O  | -0.03781900 | 1.06226200  | 1.33812200  |
| O  | 0.66853400  | 3.30361100  | 0.85819700  |
| H  | 1.20427900  | 1.36590400  | -0.99897200 |
| H  | 0.45379400  | 4.11558700  | 0.37276400  |
| O  | 3.27038300  | 0.17742800  | 1.10274900  |
| O  | 2.89443200  | 1.16981100  | -1.07203700 |
| Cl | 3.72019700  | 0.24568500  | -0.27075100 |
| H  | -0.19779800 | -0.66714800 | 1.48819600  |
| O  | 5.12660600  | 0.46915000  | -0.45894100 |
| O  | 3.48687900  | -1.21462300 | -0.92464000 |
| S  | 0.25100100  | -2.41073400 | 0.33165300  |
| O  | -1.07559700 | -2.85509000 | -0.39535400 |
| O  | -0.26828800 | -1.64282000 | 1.60446700  |
| O  | 0.93717800  | -3.60037000 | 0.72555200  |
| O  | 0.92829200  | -1.42289600 | -0.52463200 |
| H  | -1.60935000 | -2.07269100 | -0.65054600 |
| H  | 2.50643300  | -1.41984100 | -0.79514400 |

| (PA) <sub>2</sub> (SA) <sub>3</sub> | x           | y           | z           |
|-------------------------------------|-------------|-------------|-------------|
| O                                   | -3.68652000 | -1.25281700 | -1.24745400 |
| O                                   | -4.97226700 | 0.71040400  | -0.69376900 |
| Cl                                  | -3.78517300 | -0.05171600 | -0.41022600 |
| H                                   | -0.90080300 | -0.56200600 | 1.92277100  |
| O                                   | -3.54297700 | -0.31167800 | 0.99522800  |
| O                                   | -2.52618400 | 0.83451300  | -0.93642400 |
| S                                   | -0.55140600 | 1.50283800  | 2.31265500  |
| O                                   | 0.98675000  | 1.32440800  | 1.84651000  |
| O                                   | -0.88785100 | 0.02694300  | 2.71506300  |
| O                                   | -0.60601900 | 2.30031000  | 3.49477800  |
| O                                   | -1.28050400 | 1.90994800  | 1.11671200  |
| H                                   | 1.14159100  | 1.78179600  | 0.98883300  |
| H                                   | -2.06567800 | 1.21671800  | -0.13031800 |
| O                                   | 2.65487900  | 1.24537500  | -2.22465900 |
| O                                   | 0.21446800  | 1.19982900  | -1.87087300 |
| Cl                                  | 1.35340000  | 2.11893700  | -1.84929600 |
| H                                   | 2.73000600  | 0.53388200  | -1.50468100 |
| O                                   | 1.58327100  | 2.64682800  | -0.50346600 |
| O                                   | 1.31490400  | 3.12551700  | -2.86826900 |
| S                                   | 3.23196200  | -1.13495600 | 0.67790300  |
| O                                   | 2.40838400  | -1.04938100 | 2.02412000  |
| O                                   | 2.40112500  | -0.46801200 | -0.34518200 |

|   |             |             |             |
|---|-------------|-------------|-------------|
| O | 4.58904800  | -0.71209100 | 0.83696500  |
| O | 3.20993300  | -2.67345500 | 0.42415900  |
| H | 1.92280700  | -0.19463500 | 2.07187200  |
| H | 2.29374900  | -2.96808000 | 0.18670900  |
| S | -0.35433300 | -2.22150500 | -0.59099100 |
| O | -0.03439900 | -1.58706200 | -1.99698600 |
| O | 0.65281100  | -3.20046000 | -0.25002100 |
| O | -0.62935400 | -1.12813000 | 0.32961000  |
| O | -1.65045000 | -3.04238000 | -0.87696100 |
| H | 0.10263100  | -0.61789300 | -1.91709000 |
| H | -2.42027200 | -2.43884700 | -1.02632600 |

| (PA) <sub>2</sub> (SA) <sub>4</sub> | x           | y           | z           |
|-------------------------------------|-------------|-------------|-------------|
| O                                   | 3.77769400  | -0.66768100 | -1.29655900 |
| O                                   | 5.42693800  | -1.46297400 | 0.31329300  |
| Cl                                  | 4.03599200  | -1.24185500 | 0.03363200  |
| H                                   | 2.96973600  | 0.96076100  | -1.42337800 |
| O                                   | 3.30163200  | -0.54649500 | 1.06807800  |
| O                                   | 3.44944800  | -2.75625600 | -0.03772600 |
| S                                   | 0.05003300  | -1.92464000 | -1.59361300 |
| O                                   | -0.25673100 | -1.92154400 | -3.15554700 |
| O                                   | 0.66983700  | -0.52253700 | -1.31223800 |
| O                                   | -1.24119000 | -2.06574800 | -0.96385400 |
| O                                   | 1.10640400  | -2.88379900 | -1.33526100 |
| H                                   | 0.56500000  | -2.01118700 | -3.66310400 |
| H                                   | 2.53638900  | -2.72089800 | -0.43699400 |
| S                                   | -4.43965500 | -0.88117700 | 0.07640400  |
| O                                   | -3.70835500 | -1.79089700 | 1.14831300  |
| O                                   | -5.83791200 | -1.16919100 | 0.09185400  |
| O                                   | -3.97001100 | 0.48892800  | 0.30698000  |
| O                                   | -3.86863200 | -1.39585500 | -1.30178900 |
| H                                   | -2.86327600 | -1.37849300 | 1.42203900  |
| H                                   | -2.89182200 | -1.50955700 | -1.27731000 |
| O                                   | 0.76149100  | 0.47241000  | 2.70066700  |
| O                                   | -1.33635900 | -0.32432800 | 1.70896700  |
| Cl                                  | -0.13324300 | -0.82709600 | 2.42397400  |
| H                                   | 1.00496600  | 0.91621000  | 1.81284600  |
| O                                   | 0.62218400  | -1.73280800 | 1.59062900  |
| O                                   | -0.44074700 | -1.31163600 | 3.74034100  |
| S                                   | 2.23051800  | 2.47262400  | -0.10260200 |
| O                                   | 2.54428500  | 1.84301100  | -1.52010800 |
| O                                   | 1.13316500  | 1.68129500  | 0.48308200  |
| O                                   | 3.42098300  | 2.67716300  | 0.66571800  |

|   |             |            |             |
|---|-------------|------------|-------------|
| O | 1.64524800  | 3.84504900 | -0.55330500 |
| H | -0.03564500 | 0.18621600 | -1.21881600 |
| H | 0.68272900  | 3.77194900 | -0.78459900 |
| S | -1.73364500 | 2.36758800 | -0.66810500 |
| O | -1.69306200 | 2.32937500 | 0.90431400  |
| O | -0.98584200 | 3.52882500 | -1.09474900 |
| O | -1.36613600 | 1.05545400 | -1.19368800 |
| O | -3.22913800 | 2.64341800 | -1.01360400 |
| H | -1.72698200 | 1.40553300 | 1.23473800  |
| H | -3.76650400 | 1.88174400 | -0.66666800 |

| (PA) <sub>3</sub> (SA) <sub>1</sub> | x           | y           | z           |
|-------------------------------------|-------------|-------------|-------------|
| O                                   | 1.70307200  | 2.78355000  | -0.30570100 |
| O                                   | -0.27405300 | 3.90339200  | 0.45766400  |
| Cl                                  | 0.13286400  | 2.57212800  | 0.10939300  |
| H                                   | 2.07244600  | 1.87743000  | -0.45626700 |
| O                                   | -0.52075600 | 2.00041800  | -1.04671500 |
| O                                   | 0.16317100  | 1.65345500  | 1.25281000  |
| O                                   | -2.93920400 | 0.17323600  | -1.57261400 |
| O                                   | -2.72710400 | 0.67572400  | 0.83535700  |
| Cl                                  | -3.61157000 | 0.00633000  | -0.09773900 |
| H                                   | -2.01693700 | -0.18667300 | -1.48501700 |
| O                                   | -4.90655900 | 0.59925200  | -0.26908900 |
| O                                   | -3.66412200 | -1.44187200 | 0.14760100  |
| S                                   | -0.18621200 | -1.92091600 | 0.11575500  |
| O                                   | -0.04105200 | -1.06788500 | 1.42604700  |
| O                                   | -0.58773500 | -1.05207900 | -0.97943300 |
| O                                   | 0.98878100  | -2.75084700 | -0.04844300 |
| O                                   | -1.33338700 | -2.91786500 | 0.49197200  |
| H                                   | -0.02160800 | -0.09855000 | 1.24087000  |
| H                                   | -2.20423700 | -2.45719400 | 0.47842800  |
| O                                   | 3.46891100  | -2.04786300 | -0.65395100 |
| O                                   | 4.83041900  | -0.07175800 | -0.61406900 |
| Cl                                  | 3.60247300  | -0.55460300 | -0.04260700 |
| H                                   | 2.54207700  | -2.35987800 | -0.43143900 |
| O                                   | 2.40322100  | 0.14251200  | -0.54843200 |
| O                                   | 3.58943800  | -0.67111200 | 1.39709300  |

| (PA) <sub>3</sub> (SA) <sub>2</sub> | x           | y          | z           |
|-------------------------------------|-------------|------------|-------------|
| O                                   | 1.14482100  | 2.40908400 | -0.85724700 |
| O                                   | -0.10994800 | 4.44233600 | -0.65240000 |
| Cl                                  | -0.34364700 | 3.02652700 | -0.58118300 |

|    |             |             |             |
|----|-------------|-------------|-------------|
| H  | 1.02887100  | 1.42370600  | -0.85965600 |
| O  | -1.21390500 | 2.48151300  | -1.59696800 |
| O  | -0.69836500 | 2.58622900  | 0.77474300  |
| S  | 0.12565900  | -0.57129600 | 2.39124700  |
| O  | 0.04984100  | -0.72384600 | 3.96554900  |
| O  | 1.33438300  | 0.18101000  | 2.11408400  |
| O  | -0.04532400 | -1.89859400 | 1.82398700  |
| O  | -1.12883800 | 0.30375400  | 2.11094900  |
| H  | -0.55520000 | -1.44360200 | 4.20428300  |
| H  | -0.97360400 | 1.03237500  | 1.45399100  |
| O  | 3.75745600  | -0.57560800 | 1.37160800  |
| O  | 3.38310800  | 0.58075100  | -0.77941900 |
| Cl | 3.89937400  | -0.66227200 | -0.24017200 |
| H  | 2.81738900  | -0.31094700 | 1.59420600  |
| O  | 5.30768600  | -0.87591900 | -0.42069700 |
| O  | 3.07871900  | -1.81447300 | -0.64373200 |
| S  | -0.09322700 | -1.19869000 | -1.59439500 |
| O  | -1.23396800 | -0.98668200 | -2.45185400 |
| O  | 0.29056700  | -0.14801800 | -0.65181100 |
| O  | -0.24223100 | -2.52913300 | -0.78259300 |
| O  | 1.10036100  | -1.52040600 | -2.55899400 |
| H  | -2.92136100 | -0.71065800 | -2.08280300 |
| H  | 1.91557800  | -1.67223300 | -2.02919600 |
| O  | -2.87604500 | -1.51225900 | 0.31116700  |
| O  | -5.13028600 | -0.58537800 | 0.26948800  |
| Cl | -3.75658900 | -0.44295100 | -0.13855000 |
| H  | -0.23803400 | -2.33909300 | 0.19135200  |
| O  | -3.19361700 | 0.87473500  | 0.08888700  |
| O  | -3.85638700 | -0.62032100 | -1.76488400 |

| (PA) <sub>3</sub> (SA) <sub>3</sub> | x           | y           | z           |
|-------------------------------------|-------------|-------------|-------------|
| O                                   | -2.69128100 | 2.06098700  | -2.20591100 |
| O                                   | -2.39883100 | 2.84094800  | 0.06756000  |
| Cl                                  | -3.32468600 | 2.24388300  | -0.91687700 |
| H                                   | -0.13753800 | -1.99100400 | -2.35087500 |
| O                                   | -4.59898500 | 2.90742500  | -0.93022600 |
| O                                   | -3.67568500 | 0.78226100  | -0.34225100 |
| S                                   | -2.18017400 | -2.15355700 | -1.77210200 |
| O                                   | -2.12841300 | -3.43305300 | -0.85572100 |
| O                                   | -0.95360000 | -2.34142800 | -2.76067100 |
| O                                   | -3.38877600 | -2.20639200 | -2.52910200 |
| O                                   | -1.86318000 | -0.98237000 | -0.94114000 |

|    |             |             |             |
|----|-------------|-------------|-------------|
| H  | -1.31835500 | -3.42464500 | -0.29966700 |
| H  | -2.92122000 | 0.14690400  | -0.56952900 |
| O  | 3.98177000  | 1.11759700  | -1.46927600 |
| O  | 5.80467600  | 1.40043300  | 0.17584000  |
| Cl | 5.02286400  | 0.37301400  | -0.46494300 |
| H  | 3.39147400  | 1.70355900  | -0.91175900 |
| O  | 4.17230500  | -0.34425400 | 0.50190900  |
| O  | 5.73940500  | -0.50498400 | -1.35177100 |
| S  | 0.86757900  | 2.27075100  | 0.08574600  |
| O  | 0.54079600  | 2.08614600  | 1.60610800  |
| O  | 2.28563900  | 2.54008400  | -0.01327800 |
| O  | 0.29612600  | 1.15854200  | -0.66877200 |
| O  | 0.14291400  | 3.58691200  | -0.33568100 |
| H  | -0.26657500 | 1.53134100  | 1.74071900  |
| H  | -0.83840600 | 3.44650000  | -0.33064900 |
| O  | -2.10659000 | -1.88158700 | 2.07425200  |
| O  | -1.62729700 | 0.47220200  | 1.85692200  |
| Cl | -1.81879700 | -0.65452100 | 2.78094400  |
| H  | 0.79342000  | -0.31097500 | -0.89584500 |
| O  | -2.68724900 | -0.35147000 | 3.88291300  |
| O  | -0.37119300 | -0.85615600 | 3.51014400  |
| S  | 1.27992000  | -2.06638500 | 0.26402700  |
| O  | 2.73638000  | -2.61292800 | 0.14486000  |
| O  | 1.10994800  | -1.25024000 | -1.08215600 |
| O  | 0.41226600  | -3.21839400 | 0.23147800  |
| O  | 1.18548900  | -1.11410600 | 1.36335600  |
| H  | 3.38762500  | -1.87246100 | 0.23003900  |
| H  | 0.27602200  | -1.05443300 | 2.77921000  |

| (PA) <sub>3</sub> (SA) <sub>4</sub> | x          | y           | z           |
|-------------------------------------|------------|-------------|-------------|
| O                                   | 5.13708800 | 2.05632800  | -0.91806300 |
| O                                   | 5.80942100 | -0.17167800 | -1.50629000 |
| Cl                                  | 4.86117500 | 0.46834400  | -0.64025000 |
| H                                   | 4.40173200 | 2.53877900  | -0.45998300 |
| O                                   | 5.04816500 | 0.25084800  | 0.77529400  |
| O                                   | 3.46332400 | 0.25649800  | -1.05528600 |
| S                                   | 1.54281500 | 2.66323500  | 0.31957500  |
| O                                   | 1.07924700 | 2.91492100  | -1.15993200 |
| O                                   | 2.93980400 | 3.02715800  | 0.37928100  |
| O                                   | 0.60563400 | 3.24348400  | 1.25703600  |
| O                                   | 1.38140000 | 1.09250700  | 0.50018900  |
| H                                   | 0.11401700 | 2.70156200  | -1.23009100 |
| H                                   | 2.10318300 | 0.59698400  | 0.03679100  |

|    |             |             |             |
|----|-------------|-------------|-------------|
| O  | 2.95298800  | -2.72890600 | -0.85747300 |
| O  | 3.13578600  | -3.73789900 | 1.30929100  |
| Cl | 2.21832800  | -2.89578400 | 0.59426500  |
| H  | 0.12638700  | 0.27698600  | 1.66239900  |
| O  | 2.08735100  | -1.54721700 | 1.13030600  |
| O  | 0.92162700  | -3.49666200 | 0.31475000  |
| S  | -1.46327000 | -0.78666700 | 2.69687900  |
| O  | -2.51109800 | -0.28189800 | 1.77299000  |
| O  | -0.22660400 | 0.17119500  | 2.57209000  |
| O  | -1.77466900 | -0.93183500 | 4.07910000  |
| O  | -0.98728300 | -2.17620200 | 2.14070800  |
| H  | -3.49969400 | -1.27295800 | 0.95878300  |
| H  | -0.78841600 | -2.12861600 | 1.17802100  |
| O  | -3.75295500 | 0.01004500  | -1.02072600 |
| O  | -3.66436800 | -2.24991500 | -1.90346700 |
| Cl | -4.35636300 | -1.31192000 | -1.01635800 |
| H  | -2.70824600 | 1.29986900  | 1.28100400  |
| O  | -4.11742000 | -1.90399000 | 0.47599600  |
| O  | -5.77991700 | -1.33934600 | -1.20158500 |
| S  | -2.49197500 | 2.94010500  | -0.14533300 |
| O  | -1.78716600 | 4.25283400  | 0.34915700  |
| O  | -2.88392500 | 2.27613000  | 1.21572400  |
| O  | -3.62904900 | 3.30865100  | -0.92505700 |
| O  | -1.44853900 | 2.08989100  | -0.77542000 |
| H  | -0.95975600 | 4.03475900  | 0.83911300  |
| H  | -1.39820500 | 0.78237200  | -1.85043000 |
| S  | -0.36213600 | -1.08005700 | -1.71832400 |
| O  | -0.96025800 | -2.31712000 | -2.46633800 |
| O  | -1.00666600 | 0.12534000  | -2.48392200 |
| O  | -0.82628400 | -1.04058000 | -0.33779200 |
| O  | 1.06242800  | -1.10301300 | -1.96961200 |
| H  | -1.93173800 | -2.36844400 | -2.30790200 |
| H  | 2.34743300  | -2.15515200 | -1.39479400 |

| (PA) <sub>4</sub> (SA) <sub>1</sub> | x           | y           | z           |
|-------------------------------------|-------------|-------------|-------------|
| O                                   | 0.16225000  | 1.28974300  | -1.78160800 |
| O                                   | 0.59731100  | 2.76285900  | 0.09882900  |
| Cl                                  | 0.71229300  | 2.55618800  | -1.34849900 |
| H                                   | 0.43653100  | -1.71057700 | -0.81605900 |
| O                                   | 2.32136700  | 2.48198700  | -1.63643200 |
| O                                   | 0.31434200  | 3.69757300  | -2.12225100 |
| O                                   | -1.91815700 | -0.99262000 | -1.82888200 |
| O                                   | -1.76942100 | -3.29124100 | -2.56781000 |
| Cl                                  | -1.46656700 | -2.35642100 | -1.52122100 |

|    |             |             |             |
|----|-------------|-------------|-------------|
| H  | -1.99754400 | 0.36893200  | -0.73576400 |
| O  | 0.16515400  | -2.30072800 | -1.56432300 |
| O  | -1.83263300 | -2.76916000 | -0.18251500 |
| O  | 3.14710700  | 0.67633800  | 0.25037400  |
| O  | 2.92450300  | -1.58098900 | -0.59748000 |
| Cl | 3.76909000  | -0.65415300 | 0.12668700  |
| H  | 2.68444200  | 1.78819500  | -1.03041400 |
| O  | 5.13920800  | -0.61627200 | -0.30258400 |
| O  | 3.87073000  | -1.18457300 | 1.65156400  |
| S  | 0.25986700  | -0.39697000 | 1.94620800  |
| O  | -0.93859600 | -1.08753300 | 2.66259200  |
| O  | 0.21553600  | -0.57548600 | 0.50414000  |
| O  | -0.01593700 | 1.12177600  | 2.24367700  |
| O  | 1.44099900  | -0.84660700 | 2.65672300  |
| H  | -1.79966500 | -0.85475900 | 2.23612600  |
| H  | 2.95727900  | -1.08231800 | 2.05545800  |
| O  | -3.63354800 | 1.97049000  | 1.56740400  |
| O  | -4.59601000 | 0.69760900  | -0.28008000 |
| Cl | -3.54417900 | 0.82927900  | 0.69666200  |
| H  | 0.13919900  | 1.66312800  | 1.43445300  |
| O  | -2.15807200 | 1.13572600  | -0.12287000 |
| O  | -3.28806500 | -0.43497800 | 1.40125000  |

| (PA) <sub>4</sub> (SA) <sub>2</sub> | x           | y           | z           |
|-------------------------------------|-------------|-------------|-------------|
| O                                   | 2.36643600  | -0.40096200 | 2.06516500  |
| O                                   | 0.00243200  | -0.79904600 | 2.39109600  |
| Cl                                  | 1.23238100  | -0.20798400 | 2.94520400  |
| H                                   | 0.46724000  | 0.50294700  | -1.66638200 |
| O                                   | 1.45138300  | -0.53713800 | 4.32579900  |
| O                                   | 0.94223500  | 1.38795100  | 2.99959700  |
| S                                   | 1.29647000  | 2.25035600  | -0.76206400 |
| O                                   | 0.74994400  | 3.65220400  | -1.18672400 |
| O                                   | 0.90801100  | 1.34087900  | -1.97143500 |
| O                                   | 2.73627600  | 2.40290400  | -0.70264000 |
| O                                   | 0.58274700  | 1.77723100  | 0.41686800  |
| H                                   | -0.22903800 | 3.68452900  | -1.06826600 |
| H                                   | 0.79998800  | 1.66972700  | 2.05257800  |
| O                                   | -2.17073500 | 1.26094000  | -0.79898100 |
| O                                   | -1.99190700 | 3.63654600  | -0.73291400 |
| Cl                                  | -2.68925700 | 2.58717200  | 0.00995000  |
| H                                   | -2.35048800 | 0.46663000  | -0.23057400 |
| O                                   | -4.12034400 | 2.64717400  | -0.15095700 |
| O                                   | -2.24516000 | 2.43741700  | 1.37773700  |

|    |             |             |             |
|----|-------------|-------------|-------------|
| O  | 4.60221300  | 0.56214600  | -0.27862400 |
| O  | 4.43603100  | -0.18106600 | -2.63090400 |
| Cl | 4.25611500  | -0.66050800 | -1.27975500 |
| H  | 3.91135800  | 1.27115400  | -0.43332100 |
| O  | 5.16640300  | -1.69229600 | -0.86301500 |
| O  | 2.84379400  | -0.97386500 | -0.99248100 |
| S  | -0.18855500 | -2.28047400 | -1.00049600 |
| O  | -1.32390500 | -3.07407200 | -1.42409500 |
| O  | -0.30237800 | -0.83120100 | -1.09698600 |
| O  | 0.21506600  | -2.66607400 | 0.46141500  |
| O  | 1.02447200  | -2.81008100 | -1.83273900 |
| H  | -2.93312900 | -2.63723300 | -1.19998500 |
| H  | 1.83212200  | -2.28536600 | -1.62002700 |
| O  | -3.74470300 | -3.03469100 | 1.34027600  |
| O  | -5.08111900 | -1.10061300 | 0.67857100  |
| Cl | -3.84805900 | -1.82880500 | 0.55654500  |
| H  | 0.09869400  | -1.91926800 | 1.10323600  |
| O  | -2.64758600 | -0.98396800 | 0.71206200  |
| O  | -3.84340000 | -2.26804400 | -1.01223600 |

| (PA) <sub>4</sub> (SA) <sub>3</sub> | x           | y           | z           |
|-------------------------------------|-------------|-------------|-------------|
| O                                   | -4.07936200 | 2.72335700  | -1.01707300 |
| O                                   | -3.16363300 | 3.48408400  | -3.09127400 |
| Cl                                  | -2.77746400 | 3.38286500  | -1.71185700 |
| H                                   | -3.81701900 | 2.47023900  | -0.07966700 |
| O                                   | -2.51016700 | 4.63754300  | -1.04354400 |
| O                                   | -1.69297300 | 2.40645100  | -1.47504400 |
| S                                   | -2.40110600 | 0.84578700  | 1.58221200  |
| O                                   | -2.41358600 | 0.52785000  | 3.11848500  |
| O                                   | -3.24533700 | 2.00762300  | 1.37789300  |
| O                                   | -1.02218900 | 0.87956100  | 1.12771600  |
| O                                   | -3.18257700 | -0.33844700 | 0.91983500  |
| H                                   | -1.52002100 | 0.22162000  | 3.40598500  |
| H                                   | -2.70032200 | -1.20158300 | 0.93411400  |
| O                                   | 1.69688700  | 0.84269300  | 2.47468800  |
| O                                   | 2.36314700  | -1.07471900 | 3.81506800  |
| Cl                                  | 1.24067300  | -0.61868700 | 3.04248200  |
| H                                   | 1.51550800  | 0.83912800  | 1.49790700  |
| O                                   | 0.07550800  | -0.33863300 | 3.88626800  |
| O                                   | 0.91808600  | -1.41374500 | 1.87354100  |
| S                                   | 0.26104600  | -1.73828500 | -1.80721700 |
| O                                   | -0.48207500 | -2.90016200 | -2.23981700 |
| O                                   | 1.46507500  | -2.24356400 | -0.94138700 |

|    |             |             |             |
|----|-------------|-------------|-------------|
| O  | 0.74884800  | -0.81118500 | -2.81908700 |
| O  | -0.69165100 | -1.00870700 | -0.79806300 |
| H  | -1.23366200 | -3.98557800 | -1.20063300 |
| H  | -0.28268200 | -0.24041700 | -0.33870400 |
| O  | 3.72939700  | -0.75645400 | -1.37981200 |
| O  | 4.14874100  | -0.29465600 | 0.95598200  |
| Cl | 4.74062500  | -0.43262400 | -0.35734500 |
| H  | 2.25255300  | -1.65284000 | -1.01228600 |
| O  | 5.91499000  | -1.25513200 | -0.42603000 |
| O  | 5.29879000  | 1.03037400  | -0.78722100 |
| S  | 1.73510300  | 2.03036800  | -1.05789100 |
| O  | 0.78962200  | 3.22620700  | -0.74554200 |
| O  | 1.37208800  | 0.85474100  | -0.25550200 |
| O  | 1.43981800  | 1.70571100  | -2.55283800 |
| O  | 3.07900600  | 2.54155700  | -0.89632500 |
| H  | -0.15838200 | 2.99093800  | -0.91801200 |
| H  | 4.50643400  | 1.63657700  | -0.83021800 |
| O  | -3.71773800 | -3.32200600 | -0.71743300 |
| O  | -1.63749200 | -4.64973200 | -0.57184200 |
| Cl | -2.81714200 | -3.90112800 | 0.25641900  |
| H  | 1.18198600  | 0.74669600  | -2.68358500 |
| O  | -2.13509000 | -2.86824300 | 1.05318700  |
| O  | -3.35878500 | -4.96617800 | 1.05392300  |

| (PA) <sub>4</sub> (SA) <sub>4</sub> | x           | y           | z           |
|-------------------------------------|-------------|-------------|-------------|
| O                                   | 3.45943000  | -2.38205600 | -1.28444800 |
| O                                   | 5.55143400  | -3.54964100 | -1.16938300 |
| Cl                                  | 4.86903600  | -2.50009900 | -0.46748700 |
| H                                   | 2.90920600  | -1.72336600 | -0.78303300 |
| O                                   | 5.49109200  | -1.19621000 | -0.51807900 |
| O                                   | 4.48660800  | -2.88047100 | 0.90364100  |
| S                                   | 1.95778900  | -0.72826900 | 1.80547400  |
| O                                   | 1.07642900  | -2.00757200 | 2.04883700  |
| O                                   | 2.25506700  | -0.60121100 | 0.38130300  |
| O                                   | 1.37260000  | 0.42049700  | 2.46238500  |
| O                                   | 3.24855600  | -1.12115000 | 2.58529700  |
| H                                   | 0.13483200  | -1.82678300 | 1.80622800  |
| H                                   | 3.80381600  | -1.74005100 | 2.05018300  |
| O                                   | -0.51619500 | -3.47759900 | 0.22611400  |
| O                                   | -1.30223900 | -2.96168900 | -2.00421200 |
| Cl                                  | -1.65569900 | -3.48296600 | -0.67515700 |
| H                                   | -0.16976000 | 0.54093100  | 3.20045200  |
| O                                   | -2.38922600 | -4.71394800 | -0.75257200 |

|    |             |             |             |
|----|-------------|-------------|-------------|
| O  | -2.72561500 | -2.43092000 | -0.06634700 |
| S  | -2.04758500 | -0.49761500 | 3.02448800  |
| O  | -3.30600500 | 0.37795800  | 2.74029400  |
| O  | -1.04846100 | 0.53447900  | 3.65974700  |
| O  | -2.42398900 | -1.52359400 | 3.94550800  |
| O  | -1.44138300 | -0.92294400 | 1.73284400  |
| H  | -3.11187000 | 1.22436800  | 2.26019000  |
| H  | -2.23644800 | -1.79501800 | 0.53773300  |
| O  | 2.57393300  | 2.24675400  | -0.07110600 |
| O  | 3.31283400  | 3.93072600  | -1.72405200 |
| Cl | 2.49830300  | 3.80546100  | -0.54023200 |
| H  | 2.20223200  | 1.69425000  | -0.81019400 |
| O  | 1.07753500  | 4.05971600  | -0.83094700 |
| O  | 2.97372800  | 4.49992100  | 0.62743600  |
| S  | 0.28502800  | -0.01209000 | -2.04801400 |
| O  | -0.67877000 | 0.27796200  | -3.24531500 |
| O  | 1.37340000  | 0.93188100  | -2.11402100 |
| O  | -0.51496200 | -0.12048800 | -0.82725900 |
| O  | 0.90660400  | -1.41734100 | -2.36384100 |
| H  | -1.61905900 | 0.09492600  | -2.99466200 |
| H  | 0.21911500  | -2.11933600 | -2.25868700 |
| O  | -3.60413700 | 0.24463100  | -0.27006800 |
| O  | -3.24772700 | -0.27622800 | -2.61086100 |
| Cl | -4.14185500 | 0.32761800  | -1.61452400 |
| H  | -0.58767700 | 1.06894900  | 0.25097600  |
| O  | -5.50031000 | -0.10553700 | -1.76890900 |
| O  | -4.20338900 | 1.90920700  | -1.97530800 |
| S  | -1.71061600 | 2.87465900  | 0.54186600  |
| O  | -1.01607200 | 4.22221500  | 0.90732800  |
| O  | -0.58382100 | 1.84391600  | 0.88314000  |
| O  | -2.82435400 | 2.71935200  | 1.45441100  |
| O  | -1.98159300 | 2.81271200  | -0.89450700 |
| H  | -0.20502000 | 4.33966100  | 0.35496500  |
| H  | -3.38032500 | 2.32293900  | -1.57310800 |

| (PA) <sub>1</sub> (AM) <sub>1</sub> | x          | y           | z           |
|-------------------------------------|------------|-------------|-------------|
| I                                   | 1.51854900 | -2.35425000 | 0.08061000  |
| O                                   | 0.27514400 | -2.06442000 | -2.28338500 |
| O                                   | 3.09798100 | -2.48130600 | -0.99074600 |
| H                                   | 3.19925600 | -1.63577100 | -1.45422600 |
| O                                   | 2.40932700 | -2.51576900 | 1.74299400  |

|    |             |             |             |
|----|-------------|-------------|-------------|
| O  | 1.91933500  | -0.35757900 | -2.55902300 |
| Cl | 0.71909300  | -0.96155400 | -3.21166700 |
| H  | 2.58795600  | -1.61770800 | 2.10688000  |
| O  | -0.33903600 | 0.03198600  | -3.21662400 |
| I  | -0.89820500 | 0.55327600  | 2.43645500  |
| O  | 3.06935600  | 0.84927500  | 0.76974100  |
| O  | 0.01503900  | -0.27744000 | 3.87609700  |
| H  | 0.97584600  | -0.21977700 | 3.67613900  |
| O  | -0.87880900 | 2.29103400  | 3.20542700  |
| O  | 2.57038200  | -0.07065900 | 2.89509900  |
| Cl | 3.00016200  | 1.19320700  | 2.21434800  |
| H  | -0.05193000 | 2.71289500  | 2.92174000  |
| O  | 1.92596000  | 2.16528600  | 2.40366600  |
| I  | -2.97824000 | -0.78288300 | -1.16467100 |
| O  | -1.46086600 | 2.53405500  | -1.65490100 |
| O  | -3.23412200 | 0.49298000  | -2.55178600 |
| H  | -2.44402800 | 1.06300800  | -2.59012100 |
| O  | -2.50652100 | -2.26347600 | -2.24086000 |
| O  | -0.64334700 | 3.43935500  | 0.39225100  |
| Cl | -1.85165500 | 2.96142000  | -0.28992000 |
| H  | -1.52509700 | -2.29018100 | -2.30120600 |
| O  | -2.28846500 | 1.72120900  | 0.42399000  |
| I  | 1.90251400  | 2.01014200  | -1.28930000 |
| O  | -0.73269000 | -1.86435300 | 1.40400100  |
| O  | 1.07904500  | 2.75365800  | -2.82965000 |
| H  | 0.11683000  | 2.72251700  | -2.66191100 |
| O  | 2.04452200  | 3.65438900  | -0.35002900 |
| O  | -1.36181800 | -4.02523200 | 0.65820900  |
| Cl | -1.81606700 | -2.94536300 | 1.49857000  |
| H  | 1.19035800  | 3.78055800  | 0.10392100  |
| O  | -3.01203700 | -2.30566700 | 0.89784900  |

| (PA) <sub>1</sub> (AM) <sub>2</sub> | x           | y           | z           |
|-------------------------------------|-------------|-------------|-------------|
| O                                   | -0.26683700 | -0.24318100 | 1.24193000  |
| O                                   | -0.40068100 | 1.46744700  | -0.45864100 |
| Cl                                  | -0.93557300 | 0.15393500  | -0.02865200 |
| H                                   | 1.57102100  | -1.78424700 | 0.90562800  |
| O                                   | -0.55253100 | -0.87542900 | -1.06520400 |
| O                                   | -2.38303800 | 0.19355000  | 0.11645800  |
| N                                   | 1.86721000  | -1.52377100 | -0.03421500 |
| H                                   | 2.50864800  | -2.20771800 | -0.42384900 |
| H                                   | 2.28584100  | -0.52632800 | 0.00747700  |
| H                                   | 0.98148300  | -1.43710600 | -0.59532100 |

|   |            |            |             |
|---|------------|------------|-------------|
| N | 2.54011300 | 1.13320200 | 0.06748400  |
| H | 1.59990900 | 1.47500200 | -0.15884200 |
| H | 3.19411400 | 1.56957700 | -0.57476900 |
| H | 2.75560000 | 1.47248200 | 1.00044800  |

| (PA) <sub>1</sub> (AM) <sub>3</sub> | x           | y           | z           |
|-------------------------------------|-------------|-------------|-------------|
| O                                   | 0.14934700  | -0.37714300 | -1.02128800 |
| O                                   | 1.51659800  | 1.27647700  | 0.07857300  |
| Cl                                  | 1.19593600  | -0.16764400 | 0.02365300  |
| H                                   | -2.36449300 | -0.48067300 | 0.50293700  |
| O                                   | 0.60305500  | -0.57872600 | 1.34130500  |
| O                                   | 2.38181900  | -0.96791100 | -0.25694600 |
| N                                   | -2.01207500 | 0.32442500  | 1.08715300  |
| H                                   | -2.62936400 | 0.52371500  | 1.86786800  |
| H                                   | -1.86482800 | 1.18215100  | 0.47591100  |
| H                                   | -1.06842900 | 0.03385600  | 1.41661900  |
| N                                   | -1.22281400 | 2.43308300  | -0.58364400 |
| H                                   | -0.22276600 | 2.33443300  | -0.39212800 |
| H                                   | -1.46545700 | 3.41593800  | -0.51546000 |
| H                                   | -1.34700000 | 2.14917300  | -1.55111100 |
| N                                   | -2.36381900 | -1.92041600 | -0.57711300 |
| H                                   | -2.35714100 | -2.83025200 | -0.12692700 |
| H                                   | -1.41739600 | -1.73824000 | -0.91847900 |
| H                                   | -2.97920900 | -1.98371700 | -1.38140200 |

| (PA) <sub>1</sub> (AM) <sub>4</sub> | x           | y           | z           |
|-------------------------------------|-------------|-------------|-------------|
| O                                   | 0.70680000  | 0.98914500  | 0.99234500  |
| O                                   | 0.77017900  | -1.35489700 | 0.40473400  |
| Cl                                  | 1.22675200  | 0.00939900  | -0.00255200 |
| H                                   | -2.10188600 | 1.00293900  | -0.31714700 |
| O                                   | 0.63435600  | 0.32216300  | -1.32968300 |
| O                                   | 2.68550900  | 0.05951100  | -0.05977500 |
| N                                   | -2.47746600 | 0.05000600  | -0.05521400 |
| H                                   | -3.49311200 | 0.06645500  | -0.07424600 |
| H                                   | -2.14459800 | -0.20220200 | 0.91661400  |
| H                                   | -2.12115900 | -0.67949800 | -0.73278600 |
| N                                   | -1.29736900 | -1.90660500 | -1.73727100 |
| H                                   | -0.84072200 | -1.40230400 | -2.49208900 |
| H                                   | -1.68387300 | -2.76532100 | -2.11399800 |
| H                                   | -0.54750400 | -2.14002800 | -1.08510000 |
| N                                   | -1.25772800 | 2.53521600  | -0.67713500 |
| H                                   | -0.75685600 | 2.36276700  | -1.54478800 |

|   |             |             |             |
|---|-------------|-------------|-------------|
| H | -0.54490700 | 2.47884400  | 0.05046600  |
| H | -1.63067800 | 3.47795400  | -0.70148000 |
| N | -1.33710700 | -0.66007500 | 2.44292400  |
| H | -0.58546600 | -1.22553300 | 2.04628400  |
| H | -1.74018600 | -1.15516800 | 3.23101500  |
| H | -0.87654800 | 0.17634500  | 2.79115300  |

| (PA) <sub>2</sub> (AM) <sub>1</sub> | x           | y           | z           |
|-------------------------------------|-------------|-------------|-------------|
| O                                   | 2.09088500  | 0.66272300  | 1.18188900  |
| O                                   | 1.24524900  | -1.44817600 | 0.24269400  |
| Cl                                  | 2.21767800  | -0.19876200 | 0.00783300  |
| H                                   | 0.14867900  | 2.08500300  | 0.91262600  |
| O                                   | 1.72746400  | 0.49742500  | -1.19084200 |
| O                                   | 3.51263700  | -0.79771700 | -0.16248600 |
| N                                   | -0.12998300 | 2.39242000  | -0.02217200 |
| H                                   | -0.08623700 | 3.40515500  | -0.10167400 |
| H                                   | -1.10374000 | 2.01866700  | -0.20352600 |
| H                                   | 0.51975900  | 1.93993000  | -0.68058700 |
| O                                   | -0.89929100 | -0.22034200 | 0.80587700  |
| O                                   | -1.91702700 | -1.06965300 | -1.22453800 |
| Cl                                  | -2.18486800 | -0.29040800 | -0.02175500 |
| H                                   | 0.30582700  | -1.06201900 | 0.42953400  |
| O                                   | -3.25395100 | -0.83490900 | 0.79171000  |
| O                                   | -2.48007100 | 1.13989300  | -0.37730300 |

| (PA) <sub>2</sub> (AM) <sub>2</sub> | x           | y           | z           |
|-------------------------------------|-------------|-------------|-------------|
| O                                   | 2.34604400  | -1.21326900 | -0.86620800 |
| O                                   | 2.34601400  | 1.21337800  | -0.86635500 |
| Cl                                  | 2.60052200  | 0.00010700  | -0.03521200 |
| H                                   | 0.86051900  | -2.03386300 | -0.35798500 |
| O                                   | 1.60528600  | 0.00009600  | 1.08294100  |
| O                                   | 3.96149600  | 0.00015700  | 0.47137200  |
| N                                   | 0.00057100  | -2.24802500 | 0.18745400  |
| H                                   | -0.86004700 | -2.03294300 | -0.35672200 |
| H                                   | 0.00162500  | -1.59367400 | 0.97790600  |
| H                                   | 0.00031200  | -3.21052700 | 0.51367500  |
| O                                   | -2.34449900 | 1.21303200  | -0.86705600 |
| O                                   | -2.34482700 | -1.21363700 | -0.86611900 |
| Cl                                  | -2.59959700 | 0.00006200  | -0.03558800 |
| H                                   | -0.85988700 | 2.03308400  | -0.35774200 |
| O                                   | -1.60491300 | 0.00047800  | 1.08296500  |
| O                                   | -3.96084900 | 0.00051000  | 0.47021800  |

|   |             |            |             |
|---|-------------|------------|-------------|
| N | 0.00038700  | 2.24826300 | 0.18690600  |
| H | 0.86066600  | 2.03439200 | -0.35813000 |
| H | 0.00114300  | 1.59376200 | 0.97725100  |
| H | -0.00030700 | 3.21070200 | 0.51331200  |

| (PA) <sub>2</sub> (AM) <sub>3</sub> | x           | y           | z           |
|-------------------------------------|-------------|-------------|-------------|
| O                                   | -2.62400100 | 0.70499200  | 1.27503400  |
| O                                   | -3.95885100 | 0.10809700  | -0.65646500 |
| Cl                                  | -2.71661100 | -0.14292100 | 0.05672500  |
| H                                   | -0.95312800 | 1.47737400  | 1.43987800  |
| O                                   | -1.52956700 | 0.14906100  | -0.80204000 |
| O                                   | -2.62562100 | -1.58175600 | 0.46297800  |
| N                                   | 0.03921800  | 1.73462600  | 1.31333200  |
| H                                   | 0.32903300  | 2.43576000  | 1.98875300  |
| H                                   | 0.17960300  | 2.08929000  | 0.30095100  |
| H                                   | 0.61919000  | 0.88841200  | 1.42364100  |
| N                                   | 0.36600900  | 2.36827500  | -1.33820800 |
| H                                   | 1.01664800  | 1.63761900  | -1.62503200 |
| H                                   | 0.71351500  | 3.25285000  | -1.69279900 |
| H                                   | -0.52786600 | 2.16543500  | -1.77755600 |
| O                                   | 2.00026400  | -0.36137700 | -1.27407900 |
| O                                   | 2.95587900  | 1.20032800  | 0.31446700  |
| Cl                                  | 2.66241900  | -0.21366700 | 0.05049600  |
| H                                   | -0.01021200 | -1.67164000 | -1.19944600 |
| O                                   | 1.64300400  | -0.66715500 | 1.09326900  |
| O                                   | 3.84295700  | -1.06033200 | 0.14009600  |
| N                                   | -0.07905200 | -2.25396200 | -0.36157500 |
| H                                   | 0.19987800  | -3.21021200 | -0.56291400 |
| H                                   | -1.06078300 | -2.18981000 | -0.01361900 |
| H                                   | 0.57022600  | -1.81251200 | 0.32625200  |

| (PA) <sub>2</sub> (AM) <sub>4</sub> | x           | y           | z           |
|-------------------------------------|-------------|-------------|-------------|
| O                                   | 2.70819600  | 1.06414300  | -1.14557600 |
| O                                   | 1.41623200  | 0.01386800  | 0.59854000  |
| Cl                                  | 2.69203100  | -0.06799000 | -0.17478500 |
| H                                   | -0.55559700 | -1.42214700 | -1.15483800 |
| O                                   | 2.69002900  | -1.35019500 | -0.93094600 |
| O                                   | 3.84340400  | 0.00315400  | 0.71634500  |
| N                                   | -0.01129900 | -2.24570800 | -0.84657900 |
| H                                   | -0.33471700 | -3.07468600 | -1.33589400 |
| H                                   | -0.16042200 | -2.33350300 | 0.21593600  |
| H                                   | 0.99178500  | -2.06697000 | -1.01715200 |

|    |             |             |             |
|----|-------------|-------------|-------------|
| N  | -0.34421600 | -2.09962600 | 1.87639000  |
| H  | 0.52049500  | -1.65044300 | 2.16661600  |
| H  | -0.56757600 | -2.83981000 | 2.53252000  |
| H  | -1.07984300 | -1.39437400 | 1.91947100  |
| N  | -0.03333700 | 2.42164300  | 1.77687900  |
| H  | -0.02478100 | 3.18838900  | 2.44011700  |
| H  | 0.72834800  | 1.78416300  | 1.99898300  |
| H  | -0.90092000 | 1.89847400  | 1.88546900  |
| O  | -3.76207200 | 0.87029100  | -0.60482400 |
| O  | -3.08033700 | -1.44815600 | -0.26849200 |
| Cl | -2.67568000 | -0.03635100 | -0.25204300 |
| H  | -0.02233700 | 3.13136300  | -1.52975200 |
| O  | -1.55739500 | 0.11876900  | -1.27215000 |
| O  | -2.11697700 | 0.30903600  | 1.08109800  |
| N  | 0.17211400  | 2.31409900  | -0.95914500 |
| H  | 0.10163800  | 2.53096100  | 0.08913200  |
| H  | 1.12296200  | 1.94857000  | -1.14522800 |
| H  | -0.51428900 | 1.56202300  | -1.15662200 |

| (PA) <sub>3</sub> (AM) <sub>1</sub> | x           | y           | z           |
|-------------------------------------|-------------|-------------|-------------|
| O                                   | 0.59947200  | 0.53050300  | -0.89774000 |
| O                                   | -1.32717300 | 1.99078900  | -0.87170900 |
| Cl                                  | -0.02956500 | 1.71310000  | -0.20051500 |
| H                                   | -0.23571800 | -2.04557800 | 1.93037900  |
| O                                   | -0.29710700 | 1.29527800  | 1.19984000  |
| O                                   | 0.84380700  | 2.86584800  | -0.27346600 |
| N                                   | -0.01223900 | -1.48646300 | 1.11035200  |
| H                                   | -0.05234900 | -0.47287100 | 1.34094600  |
| H                                   | -0.71447300 | -1.64555200 | 0.37503800  |
| H                                   | 0.92695400  | -1.71173100 | 0.74902200  |
| O                                   | -3.57044300 | 0.72854900  | -0.44640600 |
| O                                   | -2.94057200 | -0.63065700 | 1.51986000  |
| Cl                                  | -3.37829900 | -0.75864300 | 0.13717400  |
| H                                   | -2.65999800 | 1.16519000  | -0.54320400 |
| O                                   | -4.68065300 | -1.34292900 | -0.02896400 |
| O                                   | -2.32982800 | -1.38385600 | -0.68099100 |
| O                                   | 3.18018800  | 0.23037100  | -1.16308600 |
| O                                   | 3.07646200  | 0.07030600  | 1.29637500  |
| Cl                                  | 3.47193600  | -0.69640900 | 0.12833600  |
| H                                   | 2.19928200  | 0.47152500  | -1.12098300 |
| O                                   | 2.62091000  | -1.88756400 | -0.03118400 |
| O                                   | 4.87548400  | -0.98064500 | 0.01621400  |

| (PA) <sub>3</sub> (AM) <sub>2</sub> | x           | y           | z           |
|-------------------------------------|-------------|-------------|-------------|
| O                                   | -0.98379700 | 1.44608200  | -1.18973700 |
| O                                   | -3.09193100 | 1.22847600  | 0.06099900  |
| Cl                                  | -1.72932000 | 2.08549800  | -0.11748900 |
| H                                   | -0.18965100 | -1.03044400 | -1.99264500 |
| O                                   | -1.03142400 | 2.00349000  | 1.16481400  |
| O                                   | -2.21225200 | 3.40269000  | -0.42917700 |
| N                                   | 0.76397000  | -0.66192800 | -2.15378100 |
| H                                   | 0.86747000  | -0.32140300 | -3.10641400 |
| H                                   | 1.47089700  | -1.37488100 | -1.95234400 |
| H                                   | 0.96602000  | 0.10609800  | -1.47802600 |
| O                                   | -2.14291100 | -1.04134700 | 0.92566000  |
| O                                   | -2.28512700 | -3.37826700 | 0.29256200  |
| Cl                                  | -1.60895800 | -2.12651600 | 0.02540200  |
| H                                   | -2.80672900 | 0.29497100  | 0.32287300  |
| O                                   | -1.78088200 | -1.69684700 | -1.38461400 |
| O                                   | -0.14460300 | -2.22140200 | 0.30652400  |
| O                                   | 3.28415700  | -0.10834100 | 1.47506200  |
| O                                   | 3.27720300  | -0.91851000 | -0.81671400 |
| Cl                                  | 3.20476400  | 0.28780900  | 0.03856600  |
| H                                   | 1.64884600  | -0.15927100 | 2.10468300  |
| O                                   | 1.84141700  | 0.90738600  | -0.16125100 |
| O                                   | 4.25060800  | 1.23981400  | -0.29200400 |
| N                                   | 0.61310000  | -0.24563200 | 2.18783100  |
| H                                   | 0.17598100  | 0.59887900  | 1.79924900  |
| H                                   | 0.31703600  | -0.38231300 | 3.15076800  |
| H                                   | 0.31312200  | -1.04833500 | 1.60561700  |

| (PA) <sub>3</sub> (AM) <sub>3</sub> | x           | y           | z           |
|-------------------------------------|-------------|-------------|-------------|
| O                                   | -2.15254300 | -1.29349800 | -1.20474600 |
| O                                   | -0.44140000 | -2.40231600 | 0.08017600  |
| Cl                                  | -1.90580200 | -2.20983500 | -0.02051700 |
| H                                   | -3.28052600 | 0.06313200  | -0.72976500 |
| O                                   | -2.39219200 | -1.51436800 | 1.20049900  |
| O                                   | -2.60375700 | -3.46620400 | -0.22499200 |
| N                                   | -3.72223000 | 0.68807600  | -0.02937300 |
| H                                   | -4.73232500 | 0.71442900  | -0.13932500 |
| H                                   | -3.29416200 | 1.63862900  | -0.09426900 |
| H                                   | -3.45876900 | 0.25943600  | 0.86421600  |
| O                                   | 3.06510900  | 0.88413000  | -0.83722800 |
| O                                   | 3.28596500  | 0.06602800  | 1.44294300  |
| Cl                                  | 3.39325300  | -0.28739700 | -0.00723200 |

|    |             |             |             |
|----|-------------|-------------|-------------|
| H  | 1.17032200  | -0.70336100 | -1.34142200 |
| O  | 2.32922000  | -1.33376300 | -0.26533100 |
| O  | 4.71156100  | -0.82252300 | -0.30214100 |
| N  | 0.47434100  | -0.22803500 | -1.96491000 |
| H  | 0.45317100  | 0.77905800  | -1.73955200 |
| H  | -0.46129200 | -0.62901700 | -1.80077700 |
| H  | 0.75504900  | -0.35335000 | -2.93416600 |
| O  | -0.13063100 | 3.38134600  | 0.95720300  |
| O  | -0.18027600 | 2.50918500  | -1.31192200 |
| Cl | -0.84565500 | 2.54905700  | 0.00643600  |
| H  | 1.68716000  | -0.32961500 | 1.96197800  |
| O  | -0.94321800 | 1.13128900  | 0.51331500  |
| O  | -2.25216800 | 3.02365700  | -0.16562100 |
| N  | 0.67137100  | -0.56925900 | 2.03287200  |
| H  | 0.48267200  | -1.38456700 | 1.43057600  |
| H  | 0.11381900  | 0.21429300  | 1.65260000  |
| H  | 0.39597600  | -0.76797400 | 2.99060100  |

| (PA) <sub>3</sub> (AM) <sub>4</sub> | x           | y           | z           |
|-------------------------------------|-------------|-------------|-------------|
| O                                   | -1.33517600 | 1.12811400  | 0.54910400  |
| O                                   | -0.58356200 | 3.45887200  | 0.81508400  |
| Cl                                  | -0.97040700 | 2.41356400  | -0.15427900 |
| H                                   | -0.04610900 | 0.03333500  | 1.73892300  |
| O                                   | 0.16525700  | 2.13214100  | -1.09787400 |
| O                                   | -2.18065900 | 2.84990400  | -0.94588100 |
| N                                   | 0.93058600  | -0.04706100 | 2.03813800  |
| H                                   | 0.97929500  | -0.25677800 | 3.03223500  |
| H                                   | 1.46283400  | 0.89786700  | 1.78143900  |
| H                                   | 1.36844600  | -0.81234800 | 1.49421600  |
| N                                   | 2.20618100  | 2.16974700  | 1.19888500  |
| H                                   | 3.12976600  | 2.28615000  | 1.60646600  |
| H                                   | 1.68936100  | 3.04449100  | 1.24639100  |
| H                                   | 2.34975100  | 1.94613800  | 0.21379800  |
| O                                   | 2.94189200  | 0.31090700  | -1.18492900 |
| O                                   | 3.90754500  | -0.21616000 | 1.00899300  |
| Cl                                  | 3.41762000  | -0.78744800 | -0.27315100 |
| H                                   | 0.32913600  | 0.34642000  | -1.48812700 |
| O                                   | 2.17181100  | -1.64751400 | 0.05737600  |
| O                                   | 4.42425800  | -1.63048300 | -0.93642400 |
| N                                   | 0.29786500  | -0.66326700 | -1.71568300 |
| H                                   | 0.66756100  | -0.79557600 | -2.65506500 |
| H                                   | -0.67481800 | -1.01013300 | -1.62498300 |
| H                                   | 0.92314200  | -1.16402800 | -1.04040300 |

|    |             |             |             |
|----|-------------|-------------|-------------|
| O  | -2.37677700 | -1.43382000 | -1.13592900 |
| O  | -0.84638100 | -1.94431000 | 0.70272300  |
| Cl | -2.26356600 | -2.09449300 | 0.26790400  |
| H  | -3.44005600 | -0.05928400 | -1.01231800 |
| O  | -3.17550700 | -1.34281100 | 1.18823200  |
| O  | -2.65858700 | -3.50479600 | 0.15880500  |
| N  | -3.91930300 | 0.73255000  | -0.52162300 |
| H  | -4.90922200 | 0.77981600  | -0.75272900 |
| H  | -3.41302600 | 1.62202600  | -0.72489500 |
| H  | -3.77828300 | 0.48017900  | 0.46472900  |

| (PA) <sub>4</sub> (AM) <sub>1</sub> | x           | y           | z           |
|-------------------------------------|-------------|-------------|-------------|
| O                                   | -1.13058500 | -1.05925600 | 0.99573700  |
| O                                   | 1.03282100  | -0.96029100 | 2.03366900  |
| Cl                                  | -0.27703100 | -0.26755000 | 1.93967500  |
| H                                   | -0.25811200 | 0.52980800  | -2.50213900 |
| O                                   | -0.05922300 | 1.06755500  | 1.29566200  |
| O                                   | -0.90890500 | -0.12352900 | 3.23354200  |
| N                                   | -0.09093100 | 0.28892500  | -1.52721000 |
| H                                   | 0.90399800  | 0.41975600  | -1.29290900 |
| H                                   | -0.35618700 | -0.69295500 | -1.36577700 |
| H                                   | -0.66300100 | 0.89015500  | -0.92146600 |
| O                                   | 1.46881600  | -3.23520000 | 0.68101100  |
| O                                   | 2.24573400  | -1.66549300 | -1.05602500 |
| Cl                                  | 1.45996500  | -2.88308500 | -0.90305500 |
| H                                   | 1.25234800  | -2.39477800 | 1.18160700  |
| O                                   | 2.03176600  | -4.06267100 | -1.49013600 |
| O                                   | 0.06295800  | -2.65482400 | -1.27318000 |
| O                                   | -3.71778900 | -0.65492000 | 0.54417800  |
| O                                   | -2.73854800 | 1.30289600  | -0.59431900 |
| Cl                                  | -3.55029200 | 0.11967200  | -0.87386100 |
| H                                   | -2.78771400 | -0.84303600 | 0.86382400  |
| O                                   | -2.84924800 | -0.79931300 | -1.76326000 |
| O                                   | -4.90881900 | 0.40082100  | -1.24556700 |
| O                                   | 2.09033700  | 2.62426000  | 1.33222000  |
| O                                   | 3.39263800  | 3.58035300  | -0.43411100 |
| Cl                                  | 2.27889400  | 2.68731100  | -0.28010100 |
| H                                   | 1.31035400  | 2.01875100  | 1.49438200  |
| O                                   | 2.54771700  | 1.31198800  | -0.70833000 |
| O                                   | 1.01686800  | 3.16618700  | -0.82604900 |

| (PA) <sub>4</sub> (AM) <sub>2</sub> | x           | y           | z           |
|-------------------------------------|-------------|-------------|-------------|
| O                                   | 2.77147900  | 0.23356800  | -2.44779700 |
| O                                   | 3.03809900  | -1.88505800 | -1.21911000 |
| Cl                                  | 2.00555400  | -0.93985900 | -2.02383100 |
| H                                   | 0.35076800  | -1.15945600 | 1.62207200  |
| O                                   | 0.96599200  | -0.56326200 | -1.07203500 |
| O                                   | 1.56221400  | -1.77599800 | -3.10303800 |
| N                                   | -0.56723200 | -0.77545800 | 1.34314400  |
| H                                   | -0.85496600 | -1.15444200 | 0.43697500  |
| H                                   | -0.49025800 | 0.25419900  | 1.24687400  |
| H                                   | -1.29740900 | -0.98979300 | 2.02240500  |
| O                                   | 3.67313500  | -0.19034200 | 0.64747300  |
| O                                   | 2.12411100  | -1.48533700 | 1.99149100  |
| Cl                                  | 2.90927800  | -0.22650800 | 1.94918500  |
| H                                   | 3.34541000  | -1.33614400 | -0.42346000 |
| O                                   | 3.82450400  | -0.12370600 | 3.06563500  |
| O                                   | 1.95265500  | 0.91966600  | 1.92184300  |
| O                                   | -4.27756700 | -0.15169300 | -0.65196300 |
| O                                   | -2.80115200 | -2.08676600 | -0.25739100 |
| Cl                                  | -3.92003900 | -1.37095700 | 0.34996100  |
| H                                   | -3.42033900 | 0.36160400  | -0.79011600 |
| O                                   | -3.52668300 | -0.76140300 | 1.61873100  |
| O                                   | -5.14886600 | -2.11411600 | 0.40503100  |
| O                                   | -1.87622700 | 0.85305900  | -0.91655700 |
| O                                   | -0.62952300 | 2.00468400  | 0.79439200  |
| Cl                                  | -1.41330000 | 2.20761900  | -0.46031300 |
| H                                   | 1.18383900  | 2.58016600  | -0.89680700 |
| O                                   | -0.48698300 | 2.75467600  | -1.48277800 |
| O                                   | -2.55045600 | 3.08397000  | -0.24761500 |
| N                                   | 2.11955600  | 2.36227300  | -0.49920600 |
| H                                   | 2.65845700  | 3.21504800  | -0.36903800 |
| H                                   | 2.61039000  | 1.72350300  | -1.13516700 |
| H                                   | 1.99393500  | 1.88553100  | 0.41580400  |

| (PA) <sub>4</sub> (AM) <sub>3</sub> | x           | y           | z           |
|-------------------------------------|-------------|-------------|-------------|
| O                                   | -1.13821600 | 3.52846100  | -0.38980800 |
| O                                   | -0.95303900 | 1.33218000  | -1.28690100 |
| Cl                                  | -2.01396500 | 2.43314800  | -0.77674300 |
| H                                   | 1.74660600  | -3.44795200 | 0.30082500  |
| O                                   | -2.71329900 | 1.84589300  | 0.36499100  |
| O                                   | -2.89430800 | 2.74558900  | -1.87543400 |
| N                                   | 1.70548200  | -2.43208400 | 0.30624400  |
| H                                   | 2.62554100  | -2.02051500 | 0.03989800  |

|    |             |             |             |
|----|-------------|-------------|-------------|
| H  | 1.44161900  | -2.09386600 | 1.24456700  |
| H  | 0.99952800  | -2.11611100 | -0.37851100 |
| O  | -2.34788900 | -0.81882500 | -1.25739100 |
| O  | -2.44146400 | -3.02159500 | -2.25683000 |
| Cl | -1.71190500 | -2.19297600 | -1.31870300 |
| H  | -1.43367800 | 0.42859800  | -1.34263700 |
| O  | -0.29833300 | -2.02836500 | -1.70449400 |
| O  | -1.78302400 | -2.75737500 | 0.06308700  |
| O  | -1.06277300 | -0.26588800 | 3.53496400  |
| O  | 1.02011800  | -1.32142700 | 2.88948400  |
| Cl | 0.14851300  | -0.14448300 | 2.68621200  |
| H  | -2.47263400 | -0.61058900 | 2.46346600  |
| O  | -0.26457400 | -0.09018800 | 1.25876800  |
| O  | 0.87510300  | 1.09602100  | 3.02749300  |
| N  | -3.05340100 | -0.80663100 | 1.62715700  |
| H  | -2.99320200 | 0.00331000  | 0.99889300  |
| H  | -4.02161600 | -0.99091000 | 1.87640600  |
| H  | -2.64116000 | -1.61496000 | 1.11872500  |
| O  | 3.98391200  | 1.34061400  | -0.37594900 |
| O  | 4.01981600  | -1.08554300 | -0.45391500 |
| Cl | 3.54443500  | 0.15203200  | -1.14185500 |
| H  | 2.42540300  | 2.61799300  | 0.34737000  |
| O  | 2.03870700  | 0.10952000  | -1.11241600 |
| O  | 4.02580600  | 0.19575500  | -2.51282900 |
| N  | 1.46325700  | 2.29514700  | 0.47575600  |
| H  | 0.77151500  | 2.99373300  | 0.19862400  |
| H  | 1.30820900  | 2.00696100  | 1.45429700  |
| H  | 1.37882000  | 1.45199700  | -0.12959700 |

| (PA) <sub>4</sub> (AM) <sub>4</sub> | x           | y           | z           |
|-------------------------------------|-------------|-------------|-------------|
| O                                   | -1.62739300 | 2.33048000  | -0.92471300 |
| O                                   | -2.94231500 | 0.44656100  | -1.65245100 |
| Cl                                  | -2.98811600 | 1.67424000  | -0.83180400 |
| H                                   | -0.79638100 | 2.70544600  | 0.62473800  |
| O                                   | -3.19677400 | 1.29319300  | 0.59484700  |
| O                                   | -4.00977500 | 2.60285100  | -1.28014100 |
| N                                   | 0.00232300  | 2.90310000  | 1.25525700  |
| H                                   | -0.05135000 | 3.85694100  | 1.60279000  |
| H                                   | 0.85170400  | 2.77948100  | 0.67543800  |
| H                                   | 0.00643900  | 2.22873900  | 2.04235900  |
| O                                   | 1.24841400  | -2.32511900 | -1.50033500 |
| O                                   | -0.02454100 | -3.28053600 | 0.32806200  |
| Cl                                  | -0.00381400 | -3.05096300 | -1.12546900 |

|    |             |             |             |
|----|-------------|-------------|-------------|
| H  | -0.50478800 | -0.51308400 | -2.00890800 |
| O  | -1.14948500 | -2.12217000 | -1.47537300 |
| O  | -0.13006400 | -4.28383000 | -1.88275500 |
| N  | -0.03346200 | 0.36166100  | -2.30215400 |
| H  | 0.97752700  | 0.30548700  | -2.08811200 |
| H  | -0.46063300 | 1.15749600  | -1.80170000 |
| H  | -0.16844600 | 0.49034700  | -3.30195800 |
| O  | -1.20246800 | -1.13208200 | 3.03221700  |
| O  | 1.21309300  | -1.13523500 | 3.02313400  |
| Cl | 0.00470300  | -0.38118600 | 2.62876800  |
| H  | -2.19710900 | -1.65265700 | 1.58108300  |
| O  | -0.00027100 | -0.17666100 | 1.15544200  |
| O  | 0.00894800  | 0.94480500  | 3.29330700  |
| N  | -2.77387500 | -1.52392800 | 0.73436600  |
| H  | -2.20137600 | -1.74562500 | -0.10358000 |
| H  | -3.05078100 | -0.52726700 | 0.69493900  |
| H  | -3.59574200 | -2.12128200 | 0.75895600  |
| O  | 3.23000100  | 1.26278700  | 0.59240600  |
| O  | 4.14204800  | 2.41008000  | -1.34403100 |
| Cl | 3.00020000  | 1.68327300  | -0.81993800 |
| H  | 3.05307800  | -0.54817100 | 0.66669500  |
| O  | 2.73193800  | 0.45243300  | -1.62327400 |
| O  | 1.76851100  | 2.52891700  | -0.86111400 |
| N  | 2.78291600  | -1.54588000 | 0.72897600  |
| H  | 2.19187200  | -1.65388200 | 1.56925500  |
| H  | 3.60930200  | -2.13429600 | 0.79158400  |
| H  | 2.23257200  | -1.80182800 | -0.11285500 |

## Reference

- [1] ZHANG J, DOLG M. ABCluster: the artificial bee colony algorithm for cluster global optimization [J]. *Physical Chemistry Chemical Physics*, 2015, 17(37): 24173-81.
- [2] RAPPÉ A K, CASEWIT C J, COLWELL K, et al. UFF, a full periodic table force field for molecular mechanics and molecular dynamics simulations [J]. *Journal of the American chemical society*, 1992, 114(25): 10024-35.
- [3] STEWART J J. Optimization of parameters for semiempirical methods VI: more modifications to the NDDO approximations and re-optimization of parameters [J]. *Journal of molecular modeling*, 2013, 19: 1-32.
- [4] STEWART J J. Mopac2016 [J]. *Stewart Computational Chemistry: Colorado Springs, CO, USA*, 2016, 650.
- [5] FRISCH M E, TRUCKS G, SCHLEGEL H, et al. Gaussian 16, revision C. 01 [Z]. *Gaussian, Inc., Wallingford CT*. 2016
- [6] ZHANG R, XIE H-B, MA F, et al. Critical Role of Iodous Acid in Neutral Iodine Oxoacid Nucleation [J]. *Environ Sci Technol*, 2022, 56(19): 14166-77.
- [7] NING A, LIU L, ZHANG S, et al. The critical role of dimethylamine in the rapid formation of iodic acid particles in marine areas [J]. *npj Climate and Atmospheric Science*, 2022, 5(1): 92.
- [8] NEESE F. The ORCA program system [J]. *Wiley Interdisciplinary Reviews: Computational Molecular Science*, 2012, 2(1): 73-8.
- [9] MCGRATH M, OLENIUS T, ORTEGA I, et al. Atmospheric Cluster Dynamics Code: a flexible method for solution of the birth-death equations [J]. *Atmospheric Chemistry and Physics*, 2012, 12(5): 2345-55.
- [10] DAL MASO M, KULMALA M, LEHTINEN K E, et al. Condensation and coagulation sinks and formation of nucleation mode particles in coastal and boreal forest boundary layers [J]. *Journal of Geophysical Research: Atmospheres*, 2002, 107(D19): PAR 2-1-PAR 2-10.
- [11] LU T, CHEN F. Quantitative analysis of molecular surface based on improved Marching Tetrahedra algorithm [J]. *Journal of Molecular Graphics and Modelling*, 2012, 38: 314-23.
